# Supplementary material for: Single Cell Analysis of Endothelial Cells Identified Organ-Specific Molecular Signatures and Heart-Specific Cell Populations and Molecular Features
Source: Front Cardiovasc Med. 2019 Nov 26;6:165. doi: 10.3389/fcvm.2019.00165 (PMC6901932; doi:10.3389/fcvm.2019.00165)
Supplement: Table S1 — The organ-specific EC genes. Function FindMarkers in Seurat 2 was used to identify the genes, and default parameter Wilcox test was used to calculate the p values. [file Table_1.XLSX]

## Sheet: Brain EDC genes
	p_val	avg_logFC	pct.1	pct.2	p_val_adj
Slc2a1	0	3.97762	0.994	0.156	0
Itm2a	0	3.8832	0.995	0.155	0
Bsg	0	3.16304	1	0.8	0
Slco1c1	0	2.7726	0.963	0.01	0
Pglyrp1	0	2.76418	0.978	0.065	0
Slco1a4	0	2.56578	0.967	0.016	0
Spock2	0	2.54635	0.945	0.037	0
Slc22a8	0	2.24274	0.803	0.005	0
Lsr	0	2.19968	0.925	0.102	0
Vwa1	0	2.11674	0.963	0.268	0
Mfsd2a	0	2.07958	0.754	0.01	0
Slc38a3	0	2.03148	0.794	0.024	0
Wfdc1	0	2.02956	0.956	0.12	0
Ptn	0	1.95302	0.878	0.042	0
Degs2	0	1.95163	0.783	0.09	0
Pltp	0	1.94482	1	0.546	0
Pcp4l1	0	1.85595	0.956	0.26	0
Hmgcs2	0	1.83333	0.66	0.073	0
Mal	0	1.82419	0.85	0.128	0
Isyna1	0	1.81199	0.803	0.155	0
Paqr5	0	1.775	0.825	0.035	0
Slc38a5	0	1.71596	0.466	0.009	0
Prom1	0	1.56131	0.833	0.03	0
Apcdd1	0	1.52838	0.75	0.021	0
Gatm	0	1.52267	0.822	0.121	0
Gsta4	0	1.49623	0.758	0.08	0
Foxq1	0	1.46569	0.8	0.016	0
Itih5	0	1.45541	0.768	0.094	0
Pllp	0	1.44396	0.914	0.164	0
Fn1	0	1.40877	0.875	0.17	0
Slc40a1	0	1.39625	0.735	0.056	0
Ddc	0	1.38986	0.599	0.016	0
Slc7a5	0	1.38335	0.836	0.037	0
Abcb1a	0	1.33585	0.975	0.291	0
Ccdc141	0	1.33513	0.769	0.018	0
Ocln	0	1.33176	0.78	0.074	0
Foxf2	0	1.26362	0.807	0.004	0
Gpcpd1	0	1.22932	0.897	0.122	0
Tfrc	0	1.17944	0.652	0.052	0
Slc16a4	0	1.16844	0.587	0.021	0
Stra6	0	1.14692	0.415	0.005	0
Slc35f2	0	1.03537	0.521	0.004	0
5430407P10Rik	0	1.0056	0.554	0.028	0
Lef1	0	0.988164	0.766	0.018	0
Pdxk	0	0.985884	0.71	0.053	0
Slc19a3	0	0.983214	0.582	0.005	0
Elovl7	0	0.97867	0.576	0.025	0
Tspan5	0	0.906304	0.763	0.113	0
Lrp8	0	0.821809	0.557	0.006	0
Car5a	0	0.785218	0.463	0.001	0
Atp10a	0	0.771515	0.685	0.025	0
Nebl	0	0.697531	0.523	0.029	0
Tnfrsf19	0	0.693637	0.465	0.008	0
Notum	0	0.675271	0.454	0.004	0
Sgpp2	0	0.673945	0.501	0.015	0
Zic3	0	0.643783	0.493	0.001	0
Rab11fip1	0	0.626791	0.487	0.022	0
Zic2	0	0.348757	0.66	0.001	0
Igf1r	1.21472e-306	1.44976	0.913	0.26	2.60861e-302
Slc16a1	1.62231e-306	1.54689	0.64	0.073	3.48392e-302
Sorbs2	2.07115e-302	0.966403	0.877	0.188	4.44779e-298
Edn3	2.35403e-297	1.16906	0.39	0.005	5.05528e-293
Sema3c	4.02778e-293	0.886254	0.807	0.138	8.64966e-289
Slc7a1	2.20863e-288	1.16744	0.722	0.12	4.74302e-284
Slc1a1	2.91037e-285	1.12128	0.697	0.095	6.25003e-281
Grb14	1.60154e-283	1.05062	0.574	0.055	3.43931e-279
Sgms2	1.60311e-282	0.801066	0.546	0.048	3.44269e-278
Aqp11	4.04414e-280	1.00633	0.537	0.043	8.6848e-276
Slc39a10	7.36609e-279	1.25716	0.822	0.178	1.58187e-274
A930038C07Rik	9.22569e-271	0.815935	0.367	0.006	1.98122e-266
Gstm7	3.93353e-270	0.973707	0.473	0.029	8.44726e-266
Rad54b	7.30988e-268	0.777668	0.349	0.004	1.5698e-263
Maoa	1.68278e-263	1.22996	0.724	0.127	3.61377e-259
Slc30a1	4.60911e-250	1.00867	0.828	0.21	9.89807e-246
Tiam1	1.75683e-247	0.324315	0.427	0.025	3.7728e-243
Abhd2	3.80345e-245	0.547964	0.579	0.074	8.1679e-241
Ctsh	6.79871e-239	1.04638	0.869	0.253	1.46002e-234
Ttyh2	1.57859e-238	1.04875	0.661	0.119	3.39002e-234
Tsc22d1	5.69161e-234	1.32625	0.998	0.737	1.22227e-229
Tmc7	4.34249e-232	0.459252	0.348	0.011	9.32549e-228
Mfsd7c	5.05094e-232	0.564012	0.37	0.016	1.08469e-227
2610019F03Rik	8.88765e-230	1.06847	0.652	0.112	1.90862e-225
Arl4a	1.24251e-226	1.42441	0.93	0.379	2.66829e-222
Osbpl1a	4.65544e-226	0.859793	0.626	0.108	9.99756e-222
Shroom1	4.16186e-224	0.534077	0.335	0.011	8.9376e-220
Kbtbd11	2.30851e-221	0.507716	0.44	0.037	4.95753e-217
Polk	4.55805e-221	0.673739	0.616	0.1	9.78842e-217
Sgms1	2.65707e-220	1.35172	0.973	0.526	5.70607e-216
Plat	2.96102e-217	1.28837	0.881	0.307	6.3588e-213
Tbc1d4	5.4741e-216	0.62552	0.543	0.073	1.17556e-211
Tpd52	1.53361e-210	0.84262	0.739	0.179	3.29344e-206
Slc52a3	7.41e-210	1.07552	0.51	0.064	1.5913e-205
Synm	4.692e-208	0.749568	0.626	0.112	1.00761e-203
Apod	3.00625e-207	1.06117	0.482	0.064	6.45593e-203
Cobll1	2.23699e-205	0.515835	0.582	0.097	4.80393e-201
Tbx1	4.76038e-205	0.609844	0.393	0.028	1.02229e-200
Alas1	1.39843e-204	1.15736	0.771	0.213	3.00313e-200
Afap1l2	5.31208e-203	0.608488	0.457	0.049	1.14077e-198
Cldn5	3.53679e-202	1.12198	1	0.674	7.59525e-198
Cgnl1	1.73971e-199	0.703741	0.746	0.173	3.73603e-195
9430020K01Rik	7.64209e-198	1.28438	0.966	0.539	1.64114e-193
Lrrn3	7.27125e-196	0.568537	0.301	0.011	1.5615e-191
Tpd52l1	6.70462e-191	0.448669	0.275	0.007	1.43982e-186
Efr3b	3.02808e-190	0.73227	0.75	0.195	6.5028e-186
Rgs12	4.17936e-187	1.01218	0.75	0.21	8.97518e-183
Gpd2	4.64677e-187	0.963589	0.685	0.165	9.97894e-183
Slc31a1	9.96236e-187	0.984429	0.579	0.112	2.13942e-182
Slc16a2	4.37888e-185	0.828175	0.732	0.201	9.40365e-181
Slc39a8	4.76827e-185	0.534766	0.443	0.052	1.02399e-180
Tcf7	6.15026e-183	0.570513	0.452	0.063	1.32077e-178
Foxc1	1.16438e-182	0.501146	0.663	0.149	2.50051e-178
Flt1	5.84358e-182	1.00353	0.998	0.826	1.25491e-177
Far2	6.04688e-182	0.482508	0.301	0.015	1.29857e-177
Nkd1	3.17635e-181	0.772533	0.669	0.143	6.8212e-177
Esyt2	2.83863e-179	0.773151	0.775	0.236	6.09596e-175
Mt1	1.72261e-176	0.815338	0.863	0.383	3.69931e-172
Net1	8.29712e-175	0.966437	0.616	0.139	1.78181e-170
Glul	6.21649e-172	1.21834	0.953	0.56	1.33499e-167
Abcg2	1.32411e-168	1.03206	0.93	0.431	2.84352e-164
E030010A14Rik	6.98357e-165	0.840872	0.668	0.162	1.49972e-160
Fam63a	3.42163e-164	1.06424	0.744	0.245	7.34794e-160
Col4a3bp	4.21937e-164	0.834671	0.699	0.198	9.0611e-160
Prr5l	8.10124e-164	0.678714	0.443	0.065	1.73974e-159
Abcc4	1.80959e-163	0.646726	0.78	0.244	3.88609e-159
Mpzl1	8.18435e-159	1.00512	0.864	0.352	1.75759e-154
Usp54	6.12378e-157	0.404621	0.412	0.056	1.31508e-152
Tmeff1	1.7717e-156	0.426991	0.398	0.052	3.80473e-152
Rnf144b	1.61945e-154	0.487161	0.669	0.184	3.47777e-150
Cdkn2b	2.16569e-153	0.6808	0.335	0.032	4.65082e-149
Reck	1.01482e-152	0.411993	0.385	0.049	2.17932e-148
Extl3	1.08488e-152	0.551487	0.535	0.112	2.32977e-148
Slc6a6	9.36148e-152	1.01568	0.944	0.498	2.01038e-147
Zap70	4.18123e-151	0.442554	0.267	0.015	8.97919e-147
Arl2bp	2.3534e-149	0.881747	0.842	0.354	5.05394e-145
Fam107a	2.41078e-149	0.641426	0.448	0.073	5.17715e-145
AU021092	3.76176e-149	0.76048	0.672	0.169	8.07838e-145
A130022J15Rik	3.9786e-149	0.539701	0.546	0.116	8.54405e-145
Mt2	1.57847e-148	0.418811	0.676	0.222	3.38977e-144
Slc52a2	4.79697e-148	0.702892	0.367	0.046	1.03015e-143
Paqr7	1.81542e-147	0.73918	0.459	0.08	3.89862e-143
Ldlrad3	6.17845e-146	0.422506	0.449	0.075	1.32682e-141
St6galnac2	1.17091e-145	0.811253	0.705	0.214	2.51453e-141
Nhsl1	1.32002e-145	0.425633	0.554	0.122	2.83475e-141
Prkcb	6.09227e-145	0.445717	0.356	0.046	1.30832e-140
Fut8	3.98093e-143	0.549098	0.576	0.136	8.54904e-139
Tgfa	6.72885e-143	0.347756	0.293	0.025	1.44502e-138
Ablim1	7.67651e-142	0.908528	0.959	0.573	1.64853e-137
Lrrc49	3.60777e-139	0.548069	0.429	0.074	7.74768e-135
Gjc1	9.61465e-137	0.529843	0.587	0.146	2.06475e-132
Fxyd5	1.39151e-135	0.844103	0.942	0.533	2.98826e-131
Tgfb2	3.77962e-133	0.576399	0.438	0.08	8.11674e-129
Car2	1.07048e-131	0.678932	0.573	0.158	2.29885e-127
Nostrin	2.33708e-131	0.727251	0.846	0.342	5.01888e-127
Usp53	1.67626e-130	0.398504	0.406	0.07	3.59976e-126
A2ld1	3.2665e-129	0.382297	0.335	0.044	7.01482e-125
Tsc22d3	1.08181e-128	1.01222	0.913	0.585	2.32318e-124
Ly6c1	1.88138e-128	0.755423	1	0.865	4.04027e-124
C130074G19Rik	2.77541e-128	0.583298	0.683	0.219	5.96018e-124
Hspa1a	2.3749e-127	0.96441	0.761	0.317	5.10011e-123
Hspb8	2.04527e-125	0.593847	0.363	0.057	4.39222e-121
Fam13c	1.25431e-123	0.598694	0.544	0.138	2.69363e-119
Cd320	8.02061e-123	0.686531	0.437	0.088	1.72243e-118
Aif1l	1.35507e-122	0.684007	0.295	0.033	2.91002e-118
Ndrg1	5.63713e-122	0.935133	0.88	0.454	1.21057e-117
Sos1	4.72255e-120	0.639274	0.563	0.157	1.01417e-115
Ptprr	1.27558e-119	0.729776	0.513	0.124	2.7393e-115
Asb4	1.92913e-119	0.433456	0.276	0.029	4.1428e-115
Sema7a	3.57724e-119	0.450723	0.793	0.316	7.68212e-115
Golim4	4.99754e-119	0.707759	0.693	0.257	1.07322e-114
Atox1	1.19932e-117	0.624845	0.977	0.721	2.57553e-113
St3gal6	4.26896e-117	0.880176	0.819	0.393	9.1676e-113
Prnp	2.25657e-116	0.671931	0.782	0.328	4.84599e-112
Gch1	8.13983e-116	0.676736	0.733	0.267	1.74803e-111
Ppapdc2	1.0909e-115	0.673398	0.61	0.191	2.3427e-111
Tob1	2.65014e-115	0.503612	0.785	0.327	5.69117e-111
Fam118a	8.05466e-115	0.436757	0.373	0.065	1.72974e-110
Pik3ip1	2.16619e-114	0.646906	0.577	0.172	4.65189e-110
Ifnar1	1.06617e-113	0.740645	0.799	0.361	2.2896e-109
Slco2b1	2.54646e-113	0.639768	0.585	0.183	5.46852e-109
Fcgrt	1.12023e-112	0.786733	0.913	0.529	2.40568e-108
Fry	1.21549e-112	0.729406	0.878	0.456	2.61027e-108
Acsl3	1.53021e-110	0.382077	0.368	0.067	3.28613e-106
AI467606	4.48637e-110	0.70668	0.32	0.05	9.63447e-106
Slc3a2	1.21044e-109	0.893032	0.938	0.627	2.59942e-105
Layn	4.25094e-109	0.590473	0.418	0.091	9.12889e-105
Il6ra	2.80513e-108	0.44586	0.395	0.086	6.02401e-104
Nomo1	8.31753e-108	0.374443	0.465	0.113	1.78619e-103
Hspb1	1.44035e-106	0.606921	0.986	0.795	3.09316e-102
Klf2	7.01521e-103	0.742012	0.988	0.883	1.50652e-98
0610010O12Rik	5.39958e-102	0.417759	0.398	0.088	1.15956e-97
Faim	5.70227e-102	0.481639	0.466	0.119	1.22456e-97
1110034G24Rik	6.1835e-102	0.653913	0.401	0.089	1.32791e-97
Csrp2	3.00295e-101	0.692768	0.638	0.243	6.44883e-97
Rpl38	6.2954e-100	0.404535	0.977	0.782	1.35194e-95
Maob	9.80465e-100	0.570425	0.3	0.049	2.10555e-95
Tbc1d14	2.42874e-99	0.48253	0.337	0.063	5.21573e-95
Hmcn1	5.26953e-99	0.313301	0.685	0.252	1.13163e-94
Stmn1	3.32803e-98	0.433734	0.735	0.286	7.14695e-94
Agrn	9.65238e-98	0.389035	0.574	0.188	2.07285e-93
Sesn1	1.78112e-97	0.438699	0.554	0.175	3.82496e-93
Pomp	2.49046e-95	0.618332	0.906	0.546	5.34826e-91
Cd59a	2.11574e-93	0.578527	0.763	0.325	4.54356e-89
Pir	1.0093e-92	0.49341	0.39	0.09	2.16748e-88
Arap2	2.03627e-92	0.339904	0.552	0.175	4.37289e-88
Rhobtb1	3.56611e-92	0.267644	0.368	0.079	7.65821e-88
Utrn	3.66914e-92	0.619115	0.933	0.583	7.87948e-88
Kif26a	2.06372e-90	0.326337	0.513	0.161	4.43183e-86
Fyco1	9.02508e-89	0.381199	0.454	0.129	1.93814e-84
Gpr124	1.27672e-88	0.29459	0.435	0.12	2.74176e-84
Pmepa1	5.59665e-88	0.255203	0.479	0.146	1.20188e-83
Apold1	1.89916e-87	0.808099	0.906	0.603	4.07844e-83
Chn2	2.05078e-87	0.377211	0.362	0.082	4.40404e-83
Nt5c2	4.94256e-87	0.513995	0.387	0.094	1.06142e-82
Serpinb6b	1.84405e-86	0.461864	0.337	0.07	3.9601e-82
Fzd6	1.88861e-86	0.31108	0.476	0.141	4.05579e-82
Smox	2.16921e-86	0.684339	0.521	0.175	4.65838e-82
Agfg1	2.2084e-86	0.457908	0.554	0.192	4.74255e-82
Insr	4.30968e-86	0.379963	0.563	0.194	9.25503e-82
Def6	9.84228e-86	0.352309	0.315	0.063	2.11363e-81
Parvb	9.902e-86	0.326778	0.608	0.232	2.12646e-81
Palm	5.23867e-85	0.469252	0.789	0.372	1.12501e-80
Ttll7	7.70166e-85	0.254124	0.462	0.135	1.65393e-80
Ddah1	1.03273e-84	0.532901	0.496	0.152	2.21778e-80
B3gnt2	5.9086e-84	0.613194	0.696	0.314	1.26887e-79
Msi2	1.0258e-83	0.264702	0.619	0.236	2.20291e-79
Rasd1	1.36539e-83	0.637263	0.571	0.2	2.93218e-79
Lhfpl2	4.84137e-83	0.306796	0.36	0.084	1.03969e-78
Gbe1	8.03738e-83	0.304388	0.31	0.064	1.72603e-78
Nampt	2.10404e-82	0.52636	0.569	0.206	4.51843e-78
Bok	6.64342e-82	0.636236	0.491	0.157	1.42668e-77
Tmem98	1.11407e-81	0.580831	0.544	0.192	2.39246e-77
Pop5	2.24714e-81	0.453999	0.591	0.225	4.82573e-77
Znrf3	3.46795e-81	0.350427	0.392	0.102	7.44743e-77
Slc46a3	1.24427e-80	0.495353	0.337	0.078	2.67206e-76
Lmo2	3.09238e-80	0.651846	0.752	0.397	6.64088e-76
Clip1	4.17351e-80	0.497024	0.621	0.255	8.96261e-76
Nes	1.12845e-79	0.569254	0.729	0.334	2.42335e-75
Fos	3.33838e-79	1.07222	0.92	0.741	7.16918e-75
Car4	5.75192e-79	0.66758	0.803	0.432	1.23522e-74
Slc25a1	7.80586e-79	0.451046	0.477	0.157	1.67631e-74
Chka	1.13582e-78	0.422067	0.443	0.136	2.43918e-74
Cdk11b	3.52122e-77	0.432202	0.713	0.359	7.56182e-73
Ptprg	1.06071e-76	0.371384	0.764	0.367	2.27788e-72
Ppp3cc	1.34028e-76	0.345491	0.349	0.087	2.87825e-72
Jag2	3.31642e-76	0.316066	0.538	0.192	7.12202e-72
Mtus1	9.59629e-76	0.487867	0.747	0.361	2.0608e-71
Cp	3.40103e-72	0.291666	0.484	0.164	7.30372e-68
Fam129b	3.49225e-72	0.395433	0.618	0.259	7.49961e-68
Pkig	1.69165e-71	0.48179	0.635	0.286	3.63282e-67
Sepp1	1.73215e-69	0.356599	0.992	0.92	3.71979e-65
Mtmr6	1.0714e-68	0.335371	0.51	0.192	2.30083e-64
Gng5	5.08081e-68	0.456292	0.958	0.761	1.0911e-63
2410091C18Rik	6.47599e-68	0.375182	0.36	0.101	1.39072e-63
Aspscr1	7.098e-68	0.371609	0.427	0.137	1.5243e-63
Il10rb	1.17043e-67	0.60571	0.76	0.412	2.51349e-63
Pcmtd1	4.15947e-67	0.452813	0.716	0.368	8.93246e-63
Atp8a1	2.44618e-66	0.356878	0.591	0.254	5.25317e-62
B230120H23Rik	2.63868e-65	0.288824	0.491	0.179	5.66656e-61
Ssbp4	4.59073e-65	0.377365	0.665	0.313	9.8586e-61
Macf1	5.40692e-65	0.526906	0.919	0.661	1.16114e-60
Ncoa1	7.97566e-65	0.309982	0.418	0.139	1.71277e-60
Pkm2	8.80653e-65	0.537722	0.911	0.674	1.8912e-60
Jun	8.03989e-64	0.890682	0.95	0.853	1.72657e-59
Hprt	2.97009e-63	0.554601	0.768	0.429	6.37827e-59
Bhlhe40	6.24354e-63	0.295226	0.598	0.251	1.3408e-58
Hip1	8.09137e-63	0.415814	0.733	0.382	1.73762e-58
Cd2ap	1.62799e-62	0.403839	0.718	0.386	3.49611e-58
Tuba1a	2.57608e-62	0.543524	0.955	0.77	5.53214e-58
Jund	1.01255e-59	0.494077	0.93	0.802	2.17445e-55
Gcnt2	2.92736e-59	0.366791	0.463	0.174	6.28651e-55
Thsd1	3.31348e-59	0.330414	0.582	0.255	7.1157e-55
Trim16	5.58828e-59	0.348767	0.432	0.15	1.20008e-54
Atf3	6.20841e-59	0.614673	0.719	0.436	1.33326e-54
Grrp1	1.12286e-58	0.275524	0.682	0.31	2.41135e-54
Cxcl12	1.29506e-58	0.585681	0.936	0.689	2.78114e-54
Fam69a	1.86056e-58	0.447316	0.301	0.082	3.99556e-54
Ndufa7	9.89001e-58	0.406466	0.906	0.634	2.12388e-53
Tnfrsf12a	1.44057e-57	0.403013	0.473	0.186	3.09363e-53
Ap3s1	4.0649e-57	0.349393	0.534	0.232	8.72938e-53
Grasp	5.19389e-57	0.315924	0.658	0.332	1.11539e-52
Ccdc91	7.49956e-57	0.37921	0.362	0.116	1.61053e-52
Ly6a	1.18932e-56	0.469077	0.997	0.893	2.55408e-52
Fosb	1.46361e-56	0.334705	0.647	0.321	3.1431e-52
St8sia4	2.04474e-56	0.293046	0.427	0.154	4.39109e-52
B4galt4	4.30769e-56	0.415628	0.644	0.308	9.25076e-52
Bcl2l1	6.04609e-56	0.467684	0.847	0.557	1.2984e-51
Grap	6.12657e-56	0.512916	0.713	0.38	1.31568e-51
Nos3	3.47179e-55	0.397611	0.763	0.441	7.45567e-51
Cd34	4.40816e-55	0.443391	0.95	0.669	9.46653e-51
1810037I17Rik	9.24664e-55	0.367568	0.858	0.58	1.98572e-50
Rnf103	2.65509e-54	0.363093	0.412	0.153	5.70181e-50
Rhob	3.63264e-54	0.367793	0.942	0.749	7.8011e-50
Gpx1	4.74459e-54	0.510171	0.939	0.747	1.0189e-49
Ppfibp1	7.39763e-54	0.316555	0.75	0.407	1.58864e-49
Pcca	6.64086e-53	0.323238	0.282	0.078	1.42612e-48
Palmd	1.19489e-52	0.362563	0.832	0.52	2.56603e-48
Specc1l	1.45307e-52	0.27155	0.437	0.17	3.12047e-48
Enc1	1.94511e-52	0.352719	0.392	0.141	4.17713e-48
Sox17	3.20985e-52	0.364474	0.814	0.468	6.89315e-48
Smarca2	6.89273e-52	0.398066	0.749	0.439	1.48021e-47
Kif5b	2.84299e-51	0.396005	0.881	0.601	6.10532e-47
Hes1	7.28668e-51	0.597127	0.842	0.601	1.56482e-46
Ifnar2	2.15939e-50	0.427697	0.769	0.48	4.63729e-46
Srp14	2.19398e-50	0.388034	0.789	0.478	4.71158e-46
Sh3bp4	2.43172e-50	0.259357	0.417	0.158	5.22213e-46
Eps8l2	9.35155e-50	0.331622	0.315	0.099	2.00824e-45
Tpm1	3.31981e-49	0.29306	0.855	0.554	7.1293e-45
Aldh9a1	3.90063e-49	0.452458	0.435	0.18	8.3766e-45
Anxa3	5.17223e-49	0.455227	0.877	0.604	1.11074e-44
Stard3nl	7.71666e-49	0.364341	0.509	0.225	1.65715e-44
Edn1	8.21211e-49	0.449607	0.418	0.161	1.76355e-44
Myl6	1.32913e-48	0.334022	0.998	0.935	2.8543e-44
Ppp1cb	5.24593e-48	0.433033	0.713	0.429	1.12656e-43
Mtap4	9.74653e-48	0.346554	0.825	0.531	2.09307e-43
Golm1	1.36409e-47	0.462916	0.374	0.146	2.92939e-43
Msrb2	1.67732e-46	0.342031	0.257	0.073	3.60205e-42
Atp6v0e2	1.72536e-46	0.374139	0.287	0.089	3.7052e-42
Gpr4	2.35799e-46	0.391112	0.696	0.394	5.06378e-42
Klf4	2.6778e-46	0.408406	0.92	0.714	5.75058e-42
Pon2	4.1118e-46	0.440666	0.672	0.365	8.83009e-42
A4galt	6.66377e-46	0.334645	0.304	0.099	1.43104e-41
Ankrd13a	1.21534e-45	0.328875	0.559	0.276	2.60994e-41
Map1lc3a	1.43348e-45	0.27666	0.743	0.432	3.0784e-41
Snx3	1.77964e-45	0.400474	0.944	0.753	3.82178e-41
Ap1s2	3.02172e-45	0.290181	0.466	0.206	6.48914e-41
Gbp3	3.82765e-45	0.296147	0.537	0.256	8.21989e-41
Mff	6.59898e-45	0.420117	0.607	0.325	1.41713e-40
Max	1.00905e-44	0.286495	0.548	0.265	2.16694e-40
Cdc42se1	3.45169e-44	0.251515	0.513	0.241	7.41251e-40
Arf6	3.50979e-44	0.352513	0.86	0.616	7.53728e-40
Plcb1	3.61983e-44	0.253497	0.49	0.22	7.77359e-40
Ucp2	7.58007e-44	0.411532	0.835	0.566	1.62782e-39
App	8.2353e-44	0.375668	0.995	0.884	1.76853e-39
Cpt1a	1.25489e-43	0.300923	0.465	0.208	2.69488e-39
Ctnnb1	1.32559e-43	0.414327	0.959	0.742	2.84671e-39
Ak3	1.50403e-43	0.367803	0.53	0.263	3.22991e-39
Akr1a1	2.21594e-43	0.456764	0.931	0.788	4.75873e-39
Cmtm8	8.68721e-43	0.328843	0.682	0.372	1.86558e-38
Cdkn1a	2.14358e-42	0.271331	0.986	0.798	4.60333e-38
Myl12b	2.89692e-42	0.329827	0.978	0.869	6.22114e-38
Dusp22	3.60494e-42	0.358173	0.374	0.151	7.74161e-38
Gltp	4.22392e-42	0.371944	0.607	0.33	9.07086e-38
Baiap2	7.21042e-42	0.284306	0.445	0.197	1.54844e-37
Nr4a1	1.10002e-41	0.608966	0.727	0.472	2.36229e-37
Adipor2	1.27023e-41	0.306061	0.616	0.332	2.72781e-37
Prdm16	1.56409e-41	0.333098	0.42	0.18	3.35889e-37
Capg	1.83148e-41	0.527853	0.465	0.224	3.9331e-37
Pfkl	2.44228e-41	0.297169	0.502	0.24	5.24479e-37
Epas1	2.7065e-41	0.34451	0.986	0.875	5.8122e-37
Alpl	4.87214e-40	0.550328	0.42	0.186	1.04629e-35
2510002D24Rik	5.38431e-40	0.310954	0.342	0.132	1.15628e-35
Bnip3l	6.12869e-40	0.349906	0.838	0.584	1.31614e-35
Nfkbia	2.44701e-39	0.262146	0.988	0.899	5.25495e-35
Fmnl3	4.7359e-39	0.250079	0.574	0.312	1.01704e-34
Klf6	5.04247e-39	0.383259	0.905	0.687	1.08287e-34
Hsp90aa1	1.29281e-38	0.300486	0.91	0.689	2.77631e-34
Tmem123	1.29339e-38	0.325916	0.722	0.451	2.77755e-34
Htra1	2.74331e-38	0.329152	0.332	0.133	5.89127e-34
Gde1	1.04949e-37	0.343593	0.493	0.245	2.25378e-33
Bnip2	1.57461e-37	0.322017	0.821	0.546	3.38148e-33
Tpi1	1.32071e-36	0.341352	0.613	0.345	2.83622e-32
Dusp1	1.60496e-36	0.53803	0.975	0.93	3.44665e-32
Gatsl3	2.2522e-36	0.348096	0.376	0.158	4.8366e-32
Peli1	4.8564e-36	0.298133	0.537	0.287	1.04291e-31
Fnbp1l	7.17207e-36	0.252433	0.683	0.421	1.5402e-31
Txn2	1.28884e-35	0.300732	0.629	0.356	2.76777e-31
Fam63b	1.98019e-35	0.25016	0.559	0.298	4.25246e-31
Fam118b	2.20422e-35	0.271048	0.295	0.11	4.73356e-31
Ubl3	2.29563e-35	0.319204	0.8	0.542	4.92986e-31
Fkbp4	4.46036e-35	0.320363	0.671	0.392	9.57862e-31
Mxra7	7.55166e-35	0.302371	0.546	0.302	1.62172e-30
Spr	1.13e-34	0.276282	0.546	0.29	2.42668e-30
Mtpap	1.34848e-34	0.258137	0.339	0.14	2.89586e-30
Chmp3	1.36191e-34	0.314591	0.71	0.453	2.92471e-30
Calm1	2.12164e-34	0.333663	1	0.982	4.55621e-30
Osbpl9	3.20899e-34	0.277649	0.686	0.421	6.8913e-30
Bnip3	3.54579e-34	0.295421	0.488	0.242	7.61458e-30
Nap1l1	4.36087e-34	0.250067	0.552	0.304	9.36496e-30
Spnb2	2.21312e-33	0.26675	0.995	0.951	4.75267e-29
Arf2	2.48544e-33	0.262383	0.427	0.204	5.33748e-29
Eltd1	4.39837e-33	0.270143	0.949	0.756	9.44549e-29
Alad	9.43869e-33	0.265169	0.353	0.15	2.02696e-28
Hmgn1	5.3027e-31	0.253789	0.619	0.371	1.13876e-26
Slc9a3r2	1.06953e-30	0.295765	0.981	0.883	2.29682e-26
2310046O06Rik	2.996e-30	0.267445	0.473	0.245	6.43391e-26
Taldo1	6.63876e-30	0.25469	0.729	0.473	1.42567e-25
Psma6	9.60027e-30	0.279839	0.758	0.507	2.06166e-25
Ctsc	1.58707e-29	0.431976	0.329	0.162	3.40824e-25
Tmsb10	6.55596e-29	0.265313	0.835	0.737	1.40789e-24
Fdps	8.55251e-28	0.299358	0.295	0.127	1.83665e-23
Pitpna	1.62202e-27	0.327298	0.702	0.489	3.48328e-23
Mxi1	2.43164e-27	0.251637	0.321	0.146	5.22194e-23
Ctla2a	6.82223e-27	0.399769	0.846	0.697	1.46507e-22
Serpinb9	1.25013e-26	0.276072	0.534	0.312	2.68465e-22
Vamp3	2.68321e-26	0.262893	0.778	0.541	5.76219e-22
Crtap	1.1607e-25	0.280514	0.538	0.318	2.49261e-21
Plk2	4.28378e-25	0.292267	0.783	0.572	9.19941e-21
Dynll1	4.8433e-25	0.276368	0.966	0.82	1.0401e-20
Wbp5	5.1951e-24	0.304974	0.629	0.417	1.11565e-19
Oasl2	5.46018e-24	0.251352	0.399	0.21	1.17257e-19
Junb	8.30045e-24	0.274703	0.871	0.747	1.78252e-19
Mbp	3.66818e-23	0.961808	0.345	0.19	7.87741e-19
Cyr61	3.19703e-22	0.44054	0.676	0.511	6.86562e-18
Fnta	2.19183e-21	0.262057	0.473	0.28	4.70696e-17
Ivns1abp	2.4491e-18	0.250906	0.488	0.318	5.25943e-14
Rnase4	5.57705e-16	0.468443	0.399	0.272	1.19767e-11
Lars2	9.29324e-14	0.35823	0.956	0.889	1.99572e-09

## Sheet: Fat EDC genes
	p_val	avg_logFC	pct.1	pct.2	p_val_adj
Csf2rb	3.50037e-221	1.11624	0.462	0.044	7.51705e-217
Angptl4	4.1375e-152	1.77898	0.556	0.137	8.88527e-148
Fabp4	5.22439e-118	1.15127	0.923	0.605	1.12194e-113
Egr1	2.3e-99	1.12835	0.878	0.626	4.93925e-95
Aqp7	7.42023e-98	0.968161	0.754	0.327	1.59349e-93
Egr2	6.0951e-86	0.573803	0.296	0.056	1.30892e-81
Car3	2.05927e-84	1.45628	0.28	0.053	4.42227e-80
Fos	3.96942e-80	1.1883	0.897	0.747	8.52432e-76
Tob1	4.24225e-79	0.454147	0.72	0.34	9.11023e-75
Gpr160	6.19445e-78	0.823592	0.309	0.067	1.33026e-73
Hexim1	1.1458e-72	0.534515	0.472	0.163	2.4606e-68
Rbp7	1.39518e-69	0.887084	0.544	0.225	2.99614e-65
Pparg	4.74298e-64	0.901259	0.449	0.165	1.01855e-59
Cyr61	2.37594e-62	1.04078	0.765	0.497	5.10232e-58
Lmo1	2.02063e-59	0.569874	0.309	0.086	4.3393e-55
Junb	1.36136e-55	0.755639	0.892	0.744	2.92353e-51
Cldn15	1.21479e-51	0.827827	0.293	0.086	2.60876e-47
Ubc	4.319e-51	0.451519	0.973	0.951	9.27504e-47
Txnip	8.81322e-51	0.750364	0.945	0.831	1.89264e-46
Fosb	3.40658e-50	0.448629	0.631	0.326	7.31563e-46
Mylip	4.65673e-50	0.585354	0.644	0.341	1.00003e-45
Tcf15	2.45619e-49	0.53135	0.717	0.407	5.27467e-45
Mgll	1.321e-47	0.587741	0.902	0.694	2.83685e-43
Sertad1	2.93268e-45	0.73203	0.655	0.402	6.29793e-41
Pim3	9.0567e-45	0.627281	0.77	0.529	1.94493e-40
Timp4	7.18692e-44	0.585659	0.549	0.262	1.54339e-39
Plin2	3.19873e-43	1.01049	0.546	0.325	6.86928e-39
Cd300lg	6.98384e-43	0.570111	0.833	0.563	1.49978e-38
Tpst1	2.02805e-42	0.703489	0.486	0.235	4.35523e-38
Sncg	1.23227e-40	0.634164	0.362	0.149	2.64629e-36
Hrct1	9.35593e-39	0.539888	0.446	0.215	2.00919e-34
Pvrl2	1.90962e-38	0.506454	0.377	0.164	4.10091e-34
Ier5l	2.65474e-38	0.414774	0.464	0.229	5.70105e-34
8430408G22Rik	5.87174e-37	0.560912	0.77	0.528	1.26096e-32
Ppp1r15a	9.50862e-37	0.79406	0.655	0.455	2.04198e-32
S100a6	1.16718e-36	0.617457	0.597	0.393	2.50652e-32
Gadd45b	2.11026e-36	0.699533	0.433	0.213	4.53179e-32
Gstt2	2.08105e-35	0.66273	0.424	0.206	4.46906e-31
Tmcc3	3.30827e-35	0.67881	0.7	0.503	7.10452e-31
Btg1	4.88312e-35	0.485533	0.849	0.66	1.04865e-30
Atf3	7.83243e-35	0.81803	0.66	0.448	1.68201e-30
Papss2	1.52009e-34	0.509397	0.438	0.212	3.26439e-30
Cd36	1.85619e-34	0.411987	0.913	0.7	3.98618e-30
Btg2	1.24257e-33	0.604338	0.918	0.836	2.66841e-29
Zfp36	2.02915e-33	0.457691	0.889	0.764	4.35761e-29
Cdh13	2.38458e-33	0.495168	0.634	0.369	5.12089e-29
Nfkbiz	4.14376e-32	0.565983	0.585	0.355	8.89872e-28
Rasd1	4.84388e-32	0.806816	0.433	0.226	1.04022e-27
Dnajb1	2.40008e-30	0.613101	0.647	0.432	5.15418e-26
Fth1	3.98926e-30	0.378725	0.986	0.981	8.56693e-26
Btnl9	1.99523e-29	0.373428	0.509	0.27	4.28476e-25
Hspa1a	4.40171e-29	0.339139	0.578	0.351	9.45268e-25
Ptrf	2.33656e-28	0.506694	0.989	0.92	5.01776e-24
Ppp1r10	2.49391e-28	0.435045	0.49	0.283	5.35568e-24
Ier2	3.13773e-28	0.553552	0.871	0.782	6.73828e-24
Meox2	5.32797e-28	0.398394	0.446	0.226	1.14418e-23
Fam101b	1.99345e-27	0.425485	0.691	0.472	4.28093e-23
Thrsp	2.22185e-27	0.528367	0.47	0.264	4.77142e-23
Cited2	5.88305e-27	0.410429	0.361	0.183	1.26339e-22
Ablim3	3.53848e-26	0.356009	0.483	0.268	7.59889e-22
Adora2a	4.53321e-26	0.347075	0.28	0.12	9.73506e-22
Ier5	1.26407e-25	0.532951	0.633	0.457	2.71459e-21
Cst3	1.32796e-25	0.400542	0.99	0.989	2.85179e-21
Fam70b	1.43327e-25	0.373446	0.364	0.175	3.07795e-21
C1qtnf9	1.75593e-25	0.264399	0.614	0.352	3.77087e-21
Fbln5	4.81152e-25	0.739219	0.357	0.186	1.03327e-20
Ncoa7	2.4225e-24	0.366159	0.3	0.14	5.20232e-20
Dusp1	2.96634e-24	0.478484	0.963	0.932	6.37021e-20
Hsp90aa1	7.45237e-24	0.424545	0.834	0.704	1.6004e-19
Hspa2	1.05241e-23	0.254218	0.303	0.142	2.26004e-19
Pkp4	8.9778e-23	0.381678	0.549	0.35	1.92798e-18
Jun	8.99845e-23	0.383412	0.918	0.859	1.93242e-18
Sult1a1	1.06742e-22	0.621314	0.564	0.39	2.29229e-18
Lnx1	1.12193e-22	0.315717	0.361	0.187	2.40935e-18
Atf4	1.35074e-22	0.546519	0.676	0.538	2.90072e-18
Gpihbp1	2.05744e-22	0.408368	0.841	0.676	4.41835e-18
Hspb1	2.60257e-22	0.336537	0.918	0.808	5.58902e-18
Flot2	1.62016e-21	0.337852	0.338	0.177	3.47929e-17
Polr2a	2.46454e-21	0.287796	0.564	0.386	5.29261e-17
Acox1	1.31545e-20	0.420819	0.433	0.264	2.82494e-16
2810013P06Rik	2.04831e-20	0.342317	0.316	0.164	4.39874e-16
Dhrs3	2.08488e-20	0.57268	0.86	0.685	4.47728e-16
Nr4a1	1.35355e-19	0.735928	0.634	0.489	2.90674e-15
Gda	1.96959e-19	0.351831	0.303	0.157	4.22969e-15
Zfp36l1	3.5208e-19	0.286214	0.915	0.852	7.56091e-15
Klf4	4.90286e-19	0.335177	0.863	0.725	1.05289e-14
Fhl1	5.3739e-19	0.565559	0.399	0.247	1.15404e-14
Rpl41	6.5364e-19	0.276141	0.984	0.977	1.40369e-14
Fabp5	9.44003e-19	0.380824	0.649	0.457	2.02725e-14
5430416O09Rik	2.37214e-18	0.505667	0.269	0.135	5.09418e-14
Scarb1	5.40654e-18	0.737534	0.668	0.567	1.16106e-13
1190002H23Rik	7.03753e-18	0.367121	0.794	0.645	1.51131e-13
Tgfbr3	2.13875e-17	0.422183	0.433	0.27	4.59297e-13
Plp2	4.78006e-17	0.282375	0.401	0.245	1.02652e-12
Pdzd2	5.96826e-17	0.30808	0.407	0.248	1.28168e-12
Lmcd1	1.15299e-16	0.336507	0.467	0.298	2.47605e-12
Lrg1	3.86565e-16	0.918185	0.262	0.143	8.30149e-12
Errfi1	4.63407e-15	0.466074	0.374	0.243	9.95166e-11
Cxcl1	1.39394e-14	0.357148	0.295	0.171	2.99349e-10
Ctnnbip1	1.47591e-14	0.255003	0.531	0.372	3.16952e-10
Pnrc1	2.17613e-14	0.330594	0.731	0.613	4.67325e-10
Gsn	2.28895e-14	0.278757	0.857	0.76	4.91553e-10
Lars2	2.49169e-14	0.355009	0.936	0.893	5.35091e-10
Gadd45g	4.4499e-14	0.379884	0.462	0.324	9.55616e-10
Rfxap	4.66379e-14	0.332812	0.264	0.15	1.00155e-09
Lgals1	5.41585e-14	0.419811	0.346	0.217	1.16305e-09
Sgk1	5.60851e-13	0.364461	0.841	0.76	1.20443e-08
Eif4e3	6.0933e-13	0.29093	0.364	0.23	1.30854e-08
Gpr56	8.31189e-13	0.255619	0.681	0.539	1.78498e-08
Rpl3	1.11227e-12	0.264725	0.882	0.824	2.3886e-08
Dnajb9	1.3949e-12	0.356888	0.462	0.343	2.99555e-08
Tmed5	4.06641e-12	0.297405	0.593	0.458	8.73261e-08
Prkcdbp	5.93975e-12	0.291815	0.678	0.562	1.27556e-07
Lpar6	9.69489e-12	0.473933	0.459	0.342	2.08198e-07
Pja1	1.9867e-11	0.439398	0.293	0.185	4.26643e-07
Ppfibp1	3.00096e-11	0.305614	0.573	0.44	6.44457e-07
Ech1	3.45624e-11	0.319432	0.644	0.529	7.42227e-07
Tsnax	1.84831e-10	0.256241	0.436	0.315	3.96925e-06
Mgst1	4.29728e-10	0.319038	0.377	0.27	9.22842e-06
6230427J02Rik	4.87012e-10	0.38678	0.298	0.197	1.04586e-05
Pnpla2	5.87119e-10	0.397373	0.57	0.456	1.26084e-05
Crip1	1.15345e-09	0.391614	0.845	0.769	2.47704e-05
Wsb1	1.67775e-09	0.262819	0.488	0.375	3.60297e-05
Ebf1	3.84836e-09	0.266674	0.419	0.302	8.26435e-05
Clk1	4.55442e-09	0.317966	0.61	0.521	9.78061e-05
Mrrf	7.57836e-09	0.369189	0.254	0.164	0.000162745
Cebpb	8.13002e-09	0.410652	0.427	0.34	0.000174592
Tgm2	1.52935e-08	0.295625	0.765	0.681	0.000328428
Itpripl1	1.58668e-08	0.435904	0.543	0.443	0.000340739
Srsf2	1.78472e-08	0.32887	0.866	0.82	0.000383269
Sh3bp5	2.48615e-08	0.276586	0.494	0.382	0.0005339
Oat	3.79937e-08	0.262428	0.441	0.339	0.000815914
Cdkn1a	5.04338e-08	0.251725	0.878	0.818	0.00108307
Pbxip1	1.57154e-07	0.28317	0.345	0.249	0.00337488
Tppp3	2.68584e-07	0.295333	0.398	0.297	0.00576784
Serping1	3.62809e-07	0.515188	0.364	0.284	0.00779131
Ckb	7.93156e-07	0.55897	0.393	0.329	0.017033
Rbbp6	1.48876e-06	0.258711	0.47	0.369	0.0319712
Etfb	1.49222e-06	0.284708	0.546	0.45	0.0320454
Hmgcl	3.39446e-06	0.333136	0.346	0.27	0.0728961
D0H4S114	7.2893e-06	0.263018	0.52	0.409	0.156538
Anxa1	7.13865e-05	0.354758	0.357	0.291	1
Mylk	0.000154238	0.421777	0.317	0.256	1
Tuba1c	0.00380632	0.377791	0.588	0.61	1
Dstn	0.248523	0.25402	0.628	0.633	1
Clu	0.507456	0.400136	0.361	0.361	1
Cdkn1c	0.824156	0.257299	0.424	0.422	1

## Sheet: Heart EDC genes
	p_val	avg_logFC	pct.1	pct.2	p_val_adj
Fabp4	2.13378e-223	0.799267	0.953	0.489	4.58229e-219
Fabp5	1.54185e-191	1.0918	0.762	0.335	3.31112e-187
Cd81	6.29352e-167	0.730655	0.981	0.87	1.35153e-162
Cd36	1.50948e-165	1.0293	0.862	0.66	3.24161e-161
Slc28a2	1.2985e-153	1.02319	0.472	0.118	2.78852e-149
Cd300lg	1.75218e-149	0.782369	0.867	0.459	3.76281e-145
C1qtnf9	9.23331e-144	0.803507	0.641	0.255	1.98285e-139
Lpl	5.55822e-143	0.99604	0.736	0.367	1.19363e-138
Aqp7	4.41344e-136	0.785258	0.648	0.251	9.47787e-132
Car8	7.94791e-135	0.937253	0.503	0.157	1.70681e-130
Cav1	1.69608e-128	0.760462	0.933	0.838	3.64233e-124
Tcf15	2.1231e-128	0.766364	0.683	0.327	4.55935e-124
Mgll	3.74399e-127	0.794927	0.872	0.645	8.04021e-123
Kcna5	1.33053e-122	0.520549	0.449	0.132	2.85731e-118
Ehd2	5.1279e-116	0.955429	0.821	0.618	1.10122e-111
Nrp1	9.91927e-114	0.65782	0.946	0.82	2.13016e-109
Tmem88	7.1667e-112	0.735215	0.86	0.639	1.53905e-107
Meox2	3.63182e-109	0.890468	0.456	0.152	7.79934e-105
Myadm	5.00512e-107	0.97423	0.814	0.605	1.07485e-102
Sparcl1	7.33838e-95	0.741859	0.845	0.709	1.57592e-90
Ablim3	1.02954e-88	0.506291	0.492	0.196	2.21094e-84
1810011O10Rik	6.16454e-88	0.711109	0.773	0.523	1.32384e-83
Sdpr	5.21031e-87	0.570485	0.941	0.908	1.11891e-82
1190002H23Rik	1.47175e-83	0.567614	0.827	0.58	3.16059e-79
Lims2	4.25646e-81	0.781076	0.788	0.649	9.14075e-77
Gpihbp1	2.80772e-78	0.47149	0.879	0.604	6.02958e-74
Fxyd6	5.9294e-78	0.566994	0.363	0.122	1.27334e-73
Timp4	4.21284e-77	0.868308	0.48	0.209	9.04708e-73
Fam198b	1.67358e-70	0.545779	0.426	0.179	3.59401e-66
Cdkn1c	2.45038e-70	0.625702	0.59	0.331	5.26219e-66
Eng	2.20835e-66	0.616284	0.935	0.923	4.74243e-62
Gng11	3.4713e-64	0.423007	0.928	0.822	7.45461e-60
8430408G22Rik	3.22008e-62	0.76132	0.697	0.491	6.91512e-58
Cav2	3.90095e-62	0.578721	0.842	0.725	8.37728e-58
A430107O13Rik	2.43068e-61	0.353899	0.351	0.135	5.21988e-57
Lamb1	6.13098e-60	0.53425	0.356	0.144	1.31663e-55
Eepd1	1.82689e-59	0.81369	0.294	0.105	3.92325e-55
Arhgap18	3.31654e-59	0.650667	0.444	0.22	7.12226e-55
Pik3c2b	1.29021e-56	0.266845	0.521	0.266	2.77072e-52
Fscn1	1.12592e-55	0.33805	0.534	0.299	2.41792e-51
Tmsb4x	1.13339e-54	0.29857	0.999	0.998	2.43396e-50
Btnl9	2.38899e-54	0.767437	0.447	0.229	5.13036e-50
Hspg2	2.0021e-53	0.42508	0.654	0.421	4.29952e-49
Unc45b	2.47898e-53	0.539171	0.663	0.459	5.32361e-49
Jam2	3.66603e-52	0.543732	0.818	0.658	7.8728e-48
Tpm4	1.39149e-51	0.530532	0.897	0.853	2.98822e-47
Ppap2b	2.17626e-51	0.376613	0.85	0.629	4.67352e-47
Gas6	8.88777e-51	0.689845	0.688	0.515	1.90865e-46
Sepw1	3.36425e-50	0.354102	0.885	0.818	7.22472e-46
Rbp7	4.06668e-50	0.430094	0.414	0.195	8.7332e-46
Slc26a10	2.24436e-49	0.725036	0.352	0.161	4.81976e-45
Tspan6	7.10841e-48	0.605676	0.386	0.193	1.52653e-43
Fam101b	9.47504e-48	0.540782	0.636	0.434	2.03477e-43
Tcf4	1.03027e-47	0.474141	0.941	0.911	2.21251e-43
Thrsp	1.12465e-45	0.524297	0.428	0.222	2.41519e-41
Jup	1.51856e-45	0.412497	0.902	0.81	3.2611e-41
Dcn	1.71722e-45	0.877224	0.719	0.532	3.68773e-41
Emcn	2.76407e-45	0.429201	0.851	0.716	5.93583e-41
Art3	3.52743e-45	0.689018	0.277	0.112	7.57515e-41
Rftn1	1.38328e-44	0.779204	0.399	0.22	2.97059e-40
Sncaip	2.23717e-44	0.274723	0.287	0.117	4.80432e-40
Kdr	2.98963e-43	0.468619	0.843	0.71	6.42023e-39
Aplnr	4.28592e-43	0.567529	0.375	0.188	9.20401e-39
Ctnnbip1	2.54249e-42	0.492774	0.518	0.329	5.46e-38
Ednrb	1.46366e-41	0.357678	0.524	0.305	3.1432e-37
Adh1	2.25356e-41	0.709481	0.398	0.222	4.83953e-37
Psap	1.90435e-40	0.395597	0.943	0.942	4.0896e-36
Mfge8	3.15308e-40	0.455366	0.745	0.596	6.77124e-36
Sparc	8.38351e-40	0.349024	0.982	0.948	1.80036e-35
Pi16	1.22413e-38	0.474246	0.262	0.111	2.62881e-34
Gimap4	3.14702e-38	0.449689	0.612	0.422	6.75823e-34
Serpinh1	5.86624e-38	0.293155	0.801	0.683	1.25977e-33
AW112010	1.8731e-37	0.562793	0.624	0.484	4.02248e-33
Ahnak	3.67625e-37	0.420326	0.947	0.875	7.89475e-33
Sgk1	5.20341e-37	0.450176	0.823	0.744	1.11743e-32
Ltbp4	1.06097e-35	0.333793	0.853	0.691	2.27843e-31
Ptrf	2.00242e-34	0.280803	0.957	0.916	4.30019e-30
Trp53i11	5.27118e-34	0.604673	0.408	0.251	1.13199e-29
Plod1	8.09851e-34	0.678537	0.577	0.442	1.73916e-29
Cdh13	1.52276e-33	0.375123	0.534	0.34	3.27013e-29
Ehd1	4.5868e-33	0.433639	0.619	0.449	9.85015e-29
Ccnd1	4.66263e-33	0.661598	0.511	0.366	1.0013e-28
Nudt4	1.33361e-32	0.461222	0.422	0.263	2.86394e-28
Tpst1	2.28603e-32	0.481857	0.377	0.216	4.90925e-28
Lnx1	2.68371e-32	0.273587	0.318	0.155	5.76326e-28
Cd34	2.8996e-31	0.424324	0.794	0.666	6.22689e-27
Cd200	4.78544e-31	0.442094	0.825	0.749	1.02767e-26
2610305D13Rik	9.24542e-31	0.385309	0.298	0.156	1.98545e-26
Sult1a1	1.20327e-30	0.390212	0.523	0.358	2.58403e-26
Fli1	2.12926e-30	0.350943	0.793	0.65	4.57258e-26
Jam3	3.23958e-30	0.405983	0.3	0.155	6.957e-26
Tnfaip1	1.01641e-29	0.489807	0.706	0.6	2.18273e-25
Cd38	2.57164e-29	0.374684	0.588	0.428	5.52259e-25
Txnip	1.11069e-28	0.293715	0.865	0.839	2.3852e-24
F2r	2.4896e-28	0.402642	0.354	0.205	5.34642e-24
Lum	9.41964e-28	0.49219	0.312	0.171	2.02287e-23
Myct1	1.22965e-27	0.395415	0.689	0.559	2.64068e-23
Aplp2	1.66232e-27	0.381324	0.899	0.893	3.56983e-23
Ccdc80	1.98756e-26	0.501153	0.418	0.263	4.2683e-22
Tspan13	4.64004e-26	0.335653	0.911	0.833	9.96449e-22
Palm	5.68953e-26	0.349409	0.53	0.384	1.22183e-21
Cxcl12	1.03965e-25	0.490484	0.758	0.71	2.23264e-21
Ifngr1	4.77773e-25	0.378646	0.746	0.628	1.02602e-20
Fbln2	1.85435e-24	0.386218	0.421	0.27	3.98221e-20
Nfib	2.50725e-24	0.394737	0.826	0.772	5.38433e-20
Nrp2	7.03309e-24	0.262914	0.452	0.292	1.51036e-19
Pea15a	2.47289e-23	0.446587	0.756	0.693	5.31052e-19
Col4a1	3.56229e-23	0.397381	0.824	0.769	7.65002e-19
Dusp3	7.70504e-23	0.268222	0.934	0.898	1.65466e-18
Papss2	1.61043e-22	0.362152	0.331	0.199	3.45839e-18
Lama4	6.40551e-22	0.35963	0.428	0.292	1.37558e-17
Ssh2	7.77112e-22	0.454474	0.464	0.337	1.66885e-17
Fam70b	2.74939e-21	0.401964	0.279	0.161	5.9043e-17
Zyx	3.35758e-21	0.352068	0.502	0.382	7.21041e-17
Cald1	1.58184e-20	0.310879	0.58	0.448	3.397e-16
Xdh	3.53696e-20	0.49921	0.585	0.47	7.59562e-16
Gngt2	3.70312e-20	0.255257	0.609	0.482	7.95246e-16
Tmbim6	4.57734e-20	0.311217	0.884	0.901	9.82985e-16
Gopc	7.90741e-20	0.279634	0.294	0.179	1.69812e-15
Col4a2	1.05696e-19	0.389617	0.774	0.72	2.26983e-15
Mndal	1.82196e-19	0.308029	0.493	0.358	3.91266e-15
Ushbp1	5.65889e-19	0.470208	0.724	0.662	1.21525e-14
BC017612	1.13207e-18	0.317687	0.569	0.471	2.43111e-14
Tm4sf1	1.23848e-18	0.277056	0.908	0.859	2.65963e-14
Adipor1	7.84431e-18	0.401825	0.736	0.694	1.68456e-13
Snrk	9.22233e-18	0.389746	0.801	0.776	1.98049e-13
Ifi203	1.24781e-17	0.254449	0.416	0.301	2.67968e-13
Mmrn2	1.96496e-17	0.344639	0.752	0.678	4.21974e-13
S1pr1	2.07875e-17	0.277741	0.949	0.924	4.46412e-13
Oat	2.31969e-17	0.466738	0.422	0.317	4.98154e-13
Nid1	2.47458e-17	0.329742	0.484	0.356	5.31416e-13
Tie1	5.42846e-17	0.36964	0.787	0.753	1.16576e-12
Gimap6	1.19796e-16	0.30311	0.849	0.805	2.57262e-12
Msn	1.32201e-16	0.351609	0.789	0.743	2.83902e-12
Rassf9	1.37147e-16	0.365527	0.303	0.197	2.94524e-12
Mbnl2	4.94811e-16	0.450671	0.676	0.632	1.06261e-11
Mllt4	5.30253e-16	0.41424	0.706	0.647	1.13872e-11
Plscr2	7.64839e-16	0.319138	0.315	0.211	1.64249e-11
Sox18	9.17007e-16	0.307338	0.752	0.691	1.96927e-11
Fez2	1.45928e-15	0.418774	0.511	0.412	3.13381e-11
Plcb4	3.29899e-15	0.450687	0.44	0.346	7.08457e-11
Kitl	4.34518e-15	0.353629	0.694	0.607	9.33128e-11
Ctnnb1	1.10809e-14	0.293336	0.806	0.758	2.37963e-10
4930523C07Rik	1.9454e-14	0.335958	0.503	0.406	4.17776e-10
Itgb1	3.36785e-14	0.295384	0.87	0.847	7.23245e-10
Map3k1	4.08176e-14	0.282725	0.573	0.493	8.76557e-10
Tsnax	4.70095e-14	0.564933	0.39	0.303	1.00953e-09
Smtn	6.70118e-14	0.376949	0.474	0.385	1.43908e-09
Ggta1	7.10833e-14	0.349012	0.376	0.273	1.52651e-09
Cxcr7	1.23142e-13	0.441437	0.48	0.402	2.64447e-09
Fam43a	1.48192e-13	0.250682	0.474	0.381	3.18242e-09
Ets1	2.70563e-13	0.34797	0.792	0.784	5.81035e-09
Alpl	2.7718e-13	0.340832	0.286	0.187	5.95244e-09
Pdgfd	3.26852e-13	0.289432	0.35	0.254	7.01915e-09
Fstl1	5.11295e-13	0.270678	0.406	0.301	1.09801e-08
Pxdn	8.46053e-13	0.260055	0.379	0.279	1.8169e-08
Ccnd2	1.61641e-12	0.351561	0.569	0.492	3.47125e-08
Gsn	2.5597e-12	0.400603	0.833	0.742	5.49695e-08
Ercc1	2.60371e-12	0.274711	0.336	0.245	5.59146e-08
Gltscr2	5.12003e-12	0.336717	0.658	0.594	1.09953e-07
2019-09-04	9.54332e-12	0.273657	0.529	0.434	2.04943e-07
Cdc42ep1	1.36684e-11	0.279737	0.649	0.603	2.93529e-07
Slc44a2	1.93103e-11	0.332671	0.404	0.32	4.1469e-07
Tspan2	2.05609e-11	0.266903	0.323	0.235	4.41545e-07
Aqp1	2.20777e-11	0.365142	0.606	0.543	4.74119e-07
Tacc1	2.26815e-11	0.273265	0.735	0.676	4.87086e-07
Dok4	5.10552e-11	0.45783	0.287	0.213	1.09641e-06
Ilk	7.18832e-11	0.299512	0.577	0.497	1.54369e-06
Cnn2	9.42202e-11	0.291244	0.562	0.486	2.02338e-06
Rsad2	9.44516e-11	0.28977	0.401	0.317	2.02835e-06
Tpm1	1.01835e-10	0.294767	0.644	0.575	2.18691e-06
Kank3	1.64032e-10	0.341487	0.735	0.704	3.52259e-06
Adam15	5.41942e-10	0.39508	0.643	0.615	1.16382e-05
Ets2	1.36091e-09	0.321442	0.623	0.571	2.92254e-05
P4ha1	1.69344e-09	0.354274	0.354	0.278	3.63665e-05
Hnrnpf	1.70504e-09	0.259263	0.737	0.76	3.66158e-05
Ndel1	1.8655e-09	0.432418	0.587	0.548	4.00615e-05
Tmem123	2.05603e-09	0.357085	0.528	0.472	4.41532e-05
Acly	2.12031e-09	0.4781	0.411	0.342	4.55337e-05
D14Ertd668e	2.46819e-09	0.265084	0.345	0.262	5.30044e-05
Pls3	2.62054e-09	0.401313	0.578	0.535	5.62761e-05
Actn4	3.43e-09	0.282146	0.825	0.822	7.36592e-05
Apbb2	4.00021e-09	0.358067	0.622	0.575	8.59046e-05
Ptp4a3	4.79114e-09	0.273766	0.542	0.473	0.00010289
Eef2	5.22057e-09	0.269145	0.82	0.853	0.000112112
Gpr56	1.13811e-08	0.251002	0.601	0.538	0.000244408
Sp100	2.07701e-08	0.290523	0.562	0.505	0.000446038
Rnf130	3.31735e-08	0.260907	0.596	0.533	0.000712402
Slc25a4	4.36431e-08	0.254774	0.692	0.65	0.000937235
Akap2	6.45297e-08	0.250764	0.791	0.77	0.00138577
Sh2d3c	6.8618e-08	0.371022	0.557	0.504	0.00147357
Triobp	8.03248e-08	0.398385	0.462	0.406	0.00172497
Hspa12b	1.13406e-07	0.332909	0.51	0.454	0.00243539
Tmod3	2.32645e-07	0.294007	0.66	0.624	0.00499605
Sdc3	2.3603e-07	0.281901	0.395	0.326	0.00506874
Csde1	2.8901e-07	0.299031	0.666	0.616	0.00620648
Fmo2	3.40841e-07	0.34329	0.306	0.244	0.00731957
Tspan12	9.19289e-07	0.335142	0.511	0.488	0.0197417
Unc5b	1.4205e-06	0.254733	0.318	0.255	0.0305053
Mcc	1.42843e-06	0.253561	0.431	0.366	0.0306755
Cyb5r1	1.96387e-06	0.291556	0.32	0.264	0.0421742
Myo10	1.99117e-06	0.37134	0.569	0.549	0.0427603
Lyn	2.69808e-06	0.284285	0.458	0.4	0.0579412
Cfh	2.80331e-06	1.28036	0.308	0.245	0.060201
Gbp9	4.49789e-06	0.267785	0.304	0.248	0.0965922
H1f0	7.23222e-06	0.252496	0.592	0.551	0.155312
Gbp7	1.86601e-05	0.45432	0.533	0.517	0.400726
Lipe	3.038e-05	0.329362	0.39	0.344	0.65241
Myo1b	3.38635e-05	0.254923	0.327	0.279	0.727218
Gdi2	3.91909e-05	0.271343	0.644	0.632	0.841625
Lrrc8c	5.9442e-05	0.316497	0.441	0.408	1
Nck1	6.29677e-05	0.289454	0.42	0.376	1
Ptgs1	8.26043e-05	0.362187	0.282	0.236	1
Cdc42bpa	9.90116e-05	0.35476	0.381	0.343	1
Rbck1	0.000104024	0.324685	0.397	0.366	1
Pnkd	0.000224986	0.282386	0.426	0.385	1
Polr2m	0.000248523	0.271845	0.471	0.442	1
Fkbp9	0.000872315	0.280166	0.384	0.353	1
Acsl5	0.00101225	0.340675	0.381	0.352	1
Anxa6	0.00129697	0.259887	0.428	0.4	1
Cyth1	0.00132816	0.258729	0.321	0.287	1
Dars	0.00199675	0.2585	0.273	0.241	1
Coro1c	0.00215329	0.29513	0.335	0.308	1
Rapgef3	0.00270262	0.336792	0.367	0.347	1
Phactr2	0.00310377	0.358518	0.557	0.573	1
Kctd10	0.00501319	0.256916	0.461	0.456	1
Cyp2d22	0.00959762	0.289238	0.366	0.34	1
Dusp6	0.009655	0.253793	0.553	0.553	1
Ccny	0.0103292	0.258037	0.363	0.344	1
Ccnd3	0.0118579	0.250807	0.505	0.516	1
Bnip3	0.0194857	0.270365	0.29	0.274	1
Capn2	0.0196377	0.253353	0.576	0.596	1
Immt	0.0204092	0.267624	0.37	0.346	1
Pink1	0.0210961	0.276286	0.518	0.509	1
Cgnl1	0.0254226	0.318795	0.275	0.252	1
Gaa	0.0377302	0.265328	0.26	0.242	1
Plod3	0.0630981	0.265982	0.343	0.332	1
Tap2	0.0664473	0.292005	0.491	0.513	1
Spop	0.079434	0.279751	0.45	0.456	1
Nadk	0.248995	0.251794	0.34	0.338	1
Ext2	0.586081	0.280043	0.352	0.368	1
Bgn	0.612288	0.313024	0.312	0.305	1
Cpe	0.631553	0.7196	0.254	0.28	1
Apoe	0.88081	0.463081	0.884	0.84	1
Aco2	0.886812	0.28082	0.393	0.422	1
Gbp3	0.942089	0.297005	0.288	0.304	1

## Sheet: Kidney
	p_val	avg_logFC	pct.1	pct.2	p_val_adj
Igfbp5	9.76446e-94	1.94343	0.719	0.111	2.09692e-89
Ptpru	2.42308e-86	1.15093	0.605	0.075	5.20357e-82
Dkk2	8.60416e-83	1.23423	0.368	0.028	1.84774e-78
Pbx1	3.39763e-75	1.69013	0.842	0.21	7.29642e-71
Tnfaip2	2.67929e-71	1.09233	0.64	0.106	5.75378e-67
Esm1	7.68564e-71	2.34395	0.491	0.062	1.65049e-66
Dram1	7.28666e-61	1.14636	0.368	0.04	1.56481e-56
Irx3	1.88224e-52	0.798524	0.482	0.081	4.04211e-48
Ehd3	1.14781e-51	1.22286	0.649	0.138	2.46492e-47
Plscr2	9.83015e-48	1.68882	0.746	0.234	2.11103e-43
Meis2	1.153e-47	0.893559	0.579	0.124	2.47607e-43
Cd24a	6.59168e-46	1.5108	0.754	0.248	1.41556e-41
Rsad2	1.8505e-43	1.82769	0.807	0.334	3.97396e-39
Plvap	1.82987e-42	1.63668	0.825	0.349	3.92965e-38
Ppap2a	1.13077e-41	1.38764	0.965	0.662	2.42833e-37
Fam167b	1.16633e-39	0.822647	0.544	0.118	2.5047e-35
Emcn	4.66336e-38	1.29953	0.947	0.758	1.00146e-33
Ifi44	6.94233e-38	1.38288	0.675	0.218	1.49087e-33
Cldn15	2.31641e-37	1.19312	0.482	0.106	4.97449e-33
Ramp3	1.55509e-35	1.32271	0.57	0.164	3.33955e-31
Itprip	5.65793e-34	1.23613	0.579	0.172	1.21504e-29
Ltbp1	1.29849e-32	0.82469	0.605	0.186	2.7885e-28
Igfbp3	1.07856e-31	2.25112	0.649	0.256	2.31621e-27
Marcksl1	7.17004e-29	0.48496	0.588	0.188	1.53977e-24
Ehd4	1.43147e-28	0.874232	0.886	0.452	3.07408e-24
F2r	2.78339e-26	1.40758	0.623	0.247	5.97733e-22
Timp3	7.53393e-25	0.992922	0.956	0.842	1.61791e-20
Ppap2b	1.24642e-24	0.99669	0.947	0.7	2.67668e-20
AU021092	2.40941e-24	1.2292	0.614	0.235	5.1742e-20
Calml4	8.28549e-24	0.487965	0.263	0.049	1.77931e-19
Ces2e	1.574e-23	1.14524	0.333	0.077	3.38016e-19
Pdia5	8.61297e-23	0.894541	0.447	0.134	1.84964e-18
Cmpk2	2.20657e-21	1.2466	0.535	0.215	4.73862e-17
Chst2	8.9228e-21	0.942999	0.412	0.126	1.91617e-16
Hipk2	4.54121e-20	0.728615	0.404	0.126	9.75224e-16
Gpx8	2.78577e-19	0.613249	0.307	0.079	5.98244e-15
Gas7	4.61965e-18	1.13331	0.439	0.167	9.92069e-14
Ednrb	3.68485e-17	0.838295	0.702	0.373	7.91321e-13
Gimap5	4.14099e-17	1.03677	0.64	0.363	8.89277e-13
Cd200	4.99896e-17	0.745172	0.912	0.772	1.07353e-12
Laptm4a	9.72315e-17	0.529586	0.956	0.951	2.08805e-12
Cd81	1.27393e-16	0.474245	1	0.907	2.73577e-12
Zfhx3	2.2929e-16	0.579312	0.588	0.271	4.924e-12
Tbxa2r	3.20367e-16	1.03954	0.412	0.152	6.87989e-12
Ncoa7	3.78312e-16	0.901088	0.412	0.157	8.12425e-12
Slfn2	4.13293e-16	0.803127	0.465	0.184	8.87546e-12
F8	7.00045e-16	0.536073	0.298	0.079	1.50335e-11
Lrrc32	7.59092e-16	0.863851	0.57	0.27	1.63015e-11
Cyp26b1	2.39538e-15	0.674864	0.421	0.157	5.14409e-11
Fam110a	2.71612e-15	0.89446	0.368	0.131	5.83288e-11
Tbc1d1	3.11678e-15	0.610847	0.386	0.134	6.69329e-11
Nrp1	3.27023e-15	0.649063	0.974	0.861	7.02281e-11
Junb	4.31058e-15	0.818523	0.921	0.762	9.25697e-11
1200009I06Rik	5.4372e-15	0.473178	0.254	0.067	1.16764e-10
Fam117b	6.55148e-15	0.586759	0.579	0.266	1.40693e-10
Cdc14a	4.51565e-14	0.591125	0.298	0.094	9.69736e-10
Hoxb5	5.22902e-14	0.287307	0.281	0.081	1.12293e-09
Gimap6	3.01176e-13	0.616143	0.939	0.817	6.46775e-09
Ncoa3	3.59359e-13	0.707526	0.86	0.656	7.71724e-09
Enpep	6.36758e-13	0.634023	0.254	0.074	1.36744e-08
Gimap4	6.7943e-13	0.920001	0.711	0.482	1.45908e-08
Sgpp1	1.17492e-12	0.722451	0.342	0.13	2.52313e-08
Serinc3	4.67064e-12	0.577651	0.956	0.915	1.00302e-07
Hspa1a	5.83197e-12	1.3239	0.632	0.378	1.25242e-07
Limch1	6.55935e-12	0.866808	0.649	0.401	1.40862e-07
Malat1	1.2263e-11	0.434764	1	0.997	2.63348e-07
Tgtp1	1.72338e-11	0.779899	0.544	0.287	3.70095e-07
Cd38	2.21479e-11	0.779317	0.719	0.477	4.75627e-07
Irf1	5.8817e-11	0.494751	0.754	0.535	1.2631e-06
Plscr1	7.29864e-11	0.69295	0.57	0.316	1.56738e-06
Meox1	9.01369e-11	0.750221	0.395	0.175	1.93569e-06
Dhrs3	2.42544e-10	0.605767	0.842	0.707	5.20864e-06
Upp1	3.06019e-10	0.662208	0.36	0.152	6.57176e-06
Jun	3.2126e-10	0.614111	0.921	0.866	6.89906e-06
Mal	5.51679e-10	0.453926	0.482	0.231	1.18473e-05
Sh3bp5	5.98457e-10	0.702401	0.632	0.392	1.28519e-05
Egr1	7.99232e-10	0.762954	0.807	0.659	1.71635e-05
Lrrc58	1.50741e-09	0.813866	0.904	0.819	3.23717e-05
App	1.6331e-09	0.494988	0.947	0.9	3.50708e-05
Lpcat1	2.29069e-09	0.699059	0.368	0.171	4.91926e-05
Serpine2	2.82773e-09	0.647093	0.404	0.188	6.07256e-05
Sgk1	3.27385e-09	0.688825	0.851	0.769	7.03059e-05
Ly6e	5.33193e-09	0.339396	0.991	0.966	0.000114503
Ier5	5.64091e-09	0.721364	0.667	0.478	0.000121139
Cyp20a1	6.95675e-09	0.603827	0.377	0.18	0.000149396
Plk2	8.17477e-09	0.954242	0.754	0.6	0.000175553
Ripply3	9.67694e-09	0.544803	0.474	0.255	0.000207812
Plat	1.20917e-08	1.85961	0.57	0.389	0.000259668
Tspan15	2.29439e-08	0.659702	0.509	0.293	0.00049272
Pola2	2.55842e-08	0.597407	0.386	0.193	0.000549422
Rdx	3.2241e-08	0.586804	0.807	0.66	0.000692375
Tek	3.39333e-08	0.559745	0.825	0.686	0.000728718
Tgtp2	5.09557e-08	0.651435	0.623	0.419	0.00109427
Il10rb	5.21031e-08	0.741007	0.623	0.46	0.00111891
Ptgs1	5.28428e-08	0.661447	0.456	0.247	0.0011348
Hbegf	6.04193e-08	0.517395	0.5	0.288	0.0012975
Vamp5	8.7531e-08	0.501513	0.605	0.403	0.00187973
Rhob	1.34777e-07	0.440269	0.86	0.776	0.00289433
Kdr	1.3701e-07	0.535163	0.833	0.755	0.00294228
Rapgef4	1.51058e-07	0.397271	0.623	0.393	0.00324398
Ier3	1.95587e-07	0.43681	0.667	0.471	0.00420024
Asph	2.1183e-07	0.460539	0.307	0.141	0.00454904
Gas6	2.13875e-07	0.854789	0.711	0.572	0.00459296
Ccrl2	2.89718e-07	0.715393	0.395	0.21	0.00622168
Eng	2.90157e-07	0.3888	0.956	0.927	0.00623113
Ifi203	3.16476e-07	0.498996	0.526	0.336	0.00679632
Ppp1r10	3.61949e-07	0.677143	0.5	0.308	0.00777286
Btg1	4.58325e-07	0.690068	0.789	0.685	0.00984252
1810011O10Rik	5.12165e-07	0.483925	0.781	0.606	0.0109988
Slc5a3	5.66889e-07	0.511059	0.333	0.16	0.0121739
Pcdh17	6.54588e-07	0.473098	0.509	0.308	0.0140573
Nedd9	9.98462e-07	0.648944	0.544	0.361	0.021442
Atp1a1	1.31266e-06	0.641152	0.684	0.577	0.0281894
Pip4k2a	1.7962e-06	0.398406	0.289	0.139	0.0385734
H2-T23	2.23728e-06	0.490968	0.868	0.765	0.0480457
Trim47	2.3629e-06	0.582303	0.623	0.464	0.0507432
Sema3f	2.40237e-06	0.446457	0.456	0.279	0.0515908
Prkcdbp	3.12401e-06	0.484941	0.711	0.576	0.067088
Pde2a	3.20511e-06	0.554245	0.649	0.478	0.0688298
Mmrn2	3.93661e-06	0.528079	0.781	0.702	0.0845388
Cpne2	3.9761e-06	0.540274	0.368	0.202	0.0853867
Tmem176b	6.11755e-06	0.41359	0.675	0.51	0.131374
Cdc42ep4	6.2358e-06	0.629944	0.474	0.313	0.133914
Flt1	6.40259e-06	0.363274	0.912	0.85	0.137496
Oasl2	7.04148e-06	0.611628	0.395	0.234	0.151216
Ifit3	7.91547e-06	0.954002	0.36	0.211	0.169985
Socs1	8.37226e-06	0.259827	0.272	0.131	0.179794
Eltd1	8.53642e-06	0.529063	0.842	0.784	0.18332
Iigp1	8.94856e-06	1.07484	0.535	0.39	0.19217
Slc43a3	9.43452e-06	0.398635	0.798	0.631	0.202606
Gm12216	1.04056e-05	0.63769	0.325	0.178	0.22346
Lrrc8a	1.06347e-05	0.252539	0.939	0.868	0.22838
Agpat2	1.13767e-05	0.431216	0.351	0.199	0.244315
Gimap8	1.3512e-05	0.467739	0.368	0.219	0.290171
Plaur	1.47612e-05	0.744979	0.447	0.307	0.316997
I830012O16Rik	1.64472e-05	0.694961	0.281	0.146	0.353203
Hspa5	1.85307e-05	0.453664	0.877	0.856	0.397948
Tgfbr2	2.24703e-05	0.632958	0.64	0.503	0.48255
Rarg	2.72876e-05	0.318063	0.368	0.229	0.586001
2810474O19Rik	2.76653e-05	0.61193	0.509	0.359	0.594112
Ubc	2.92242e-05	0.257345	0.974	0.953	0.62759
Pi16	2.97826e-05	1.01476	0.289	0.16	0.63958
Tnfsf10	3.8906e-05	0.519001	0.491	0.362	0.835507
Fosb	4.42279e-05	0.360766	0.518	0.367	0.949794
Npr1	4.46967e-05	0.319771	0.5	0.354	0.959863
Abcg1	5.3105e-05	0.484247	0.5	0.351	1
Thbd	5.58175e-05	0.262721	0.86	0.766	1
Ccnd2	5.93598e-05	0.502182	0.658	0.515	1
Slco3a1	7.03315e-05	0.583434	0.316	0.186	1
Apbb2	8.19476e-05	0.559915	0.684	0.589	1
Efnb2	8.62694e-05	0.36846	0.614	0.458	1
St3gal5	8.94676e-05	0.385159	0.307	0.172	1
Irgm2	9.25855e-05	0.554762	0.43	0.299	1
Irf7	9.33937e-05	0.455744	0.386	0.245	1
Dlc1	9.89469e-05	0.419322	0.719	0.606	1
Atrn	0.000102101	0.488922	0.439	0.301	1
Sipa1	0.000102908	0.646313	0.5	0.369	1
Bcl2	0.000127023	0.413825	0.298	0.171	1
Slc6a6	0.000129536	0.345456	0.728	0.561	1
Kctd12	0.000134565	0.389883	0.474	0.328	1
Impact	0.000146603	0.443717	0.36	0.226	1
Slc44a2	0.000164536	0.748212	0.465	0.346	1
Lmcd1	0.000168053	0.604057	0.456	0.319	1
Spry1	0.00016814	0.316581	0.5	0.335	1
Tie1	0.000177886	0.504331	0.763	0.765	1
Ldhb	0.000192406	0.327812	0.342	0.193	1
Fam176b	0.000242879	0.395133	0.474	0.368	1
Vprbp	0.000250185	0.279908	0.272	0.154	1
Dll4	0.000250761	0.646718	0.491	0.381	1
Arhgef3	0.000250918	0.662916	0.474	0.361	1
Actn4	0.00031108	0.516868	0.816	0.823	1
Irgm1	0.000325653	0.559428	0.482	0.357	1
Dysf	0.000328132	0.270991	0.421	0.266	1
Gimap9	0.000335178	0.464887	0.307	0.186	1
Cyb5b	0.00034265	0.476263	0.412	0.288	1
Sbno2	0.000358625	0.326377	0.412	0.273	1
Bst2	0.000374242	0.312095	0.807	0.743	1
Shisa5	0.000394964	0.269969	0.781	0.77	1
Socs3	0.000402646	0.507307	0.482	0.368	1
Sncg	0.000414357	0.356464	0.298	0.177	1
Slc29a1	0.000445605	0.438841	0.553	0.414	1
Sertad1	0.000486824	0.438363	0.561	0.436	1
2010111I01Rik	0.00049605	0.417517	0.386	0.26	1
Cd47	0.000550527	0.419711	0.763	0.748	1
4933407C03Rik	0.000562809	0.467362	0.561	0.423	1
Sox4	0.000597272	0.288611	0.351	0.224	1
Itgb5	0.000632142	0.806647	0.36	0.239	1
Usp18	0.000675327	0.571617	0.351	0.227	1
Akap13	0.00069398	0.424424	0.579	0.472	1
B3gnt2	0.000719067	0.53618	0.482	0.369	1
H2-Ab1	0.000721861	0.655629	0.465	0.374	1
Tspan12	0.000768722	0.780297	0.535	0.495	1
Zfand5	0.00083693	0.329802	0.649	0.546	1
Jund	0.000844083	0.294284	0.86	0.82	1
Ets1	0.000844566	0.478959	0.781	0.787	1
Trex1	0.000853184	0.631756	0.316	0.205	1
Rnf144a	0.000873768	0.413761	0.474	0.345	1
Klf13	0.000875597	0.281731	0.93	0.884	1
Slbp	0.000875701	0.339392	0.386	0.265	1
Hsph1	0.00093872	0.308788	0.263	0.157	1
Cd34	0.000974769	0.329472	0.772	0.71	1
Id2	0.00101897	0.425272	0.553	0.44	1
Gja1	0.00103634	0.468786	0.588	0.503	1
Rgl1	0.00104042	0.324124	0.482	0.354	1
Cmtm8	0.00110949	0.352455	0.544	0.415	1
Gtf2a1	0.00113969	0.556522	0.421	0.31	1
Ifit1	0.00140972	0.63206	0.325	0.211	1
Mxra8	0.00142053	0.653483	0.316	0.214	1
Jup	0.00146018	0.341504	0.833	0.842	1
Dock1	0.00148604	0.385518	0.535	0.412	1
Brd2	0.00155234	0.533332	0.605	0.506	1
Icam1	0.0016205	0.263869	0.491	0.386	1
Ier5l	0.00166655	0.326465	0.377	0.26	1
Cald1	0.00167041	0.254517	0.614	0.491	1
Kctd12b	0.00177732	0.391935	0.281	0.173	1
Ppp1r15a	0.00178337	0.352298	0.57	0.482	1
Selm	0.00181487	0.260884	0.596	0.509	1
Spcs3	0.00184167	0.600421	0.298	0.202	1
Mospd2	0.00200373	0.372445	0.307	0.198	1
Dnm2	0.00204018	0.468637	0.553	0.495	1
Arhgap26	0.00216907	0.42568	0.386	0.262	1
Asap1	0.00217198	0.404924	0.465	0.341	1
Parp12	0.0021832	0.347347	0.342	0.235	1
Spry4	0.00231734	0.486816	0.395	0.272	1
Hexim1	0.00233846	0.311037	0.307	0.206	1
Foxo1	0.00235138	0.39237	0.579	0.502	1
BC006779	0.00266513	0.583014	0.289	0.192	1
Atp6ap2	0.00285848	0.412653	0.5	0.371	1
Nr4a1	0.00288498	0.305912	0.614	0.508	1
Stim2	0.00294492	0.708583	0.535	0.462	1
Wtap	0.00303457	0.321179	0.684	0.622	1
Insig1	0.00341095	0.311579	0.456	0.341	1
Rai14	0.00348657	0.301398	0.272	0.171	1
Tgoln1	0.0035329	0.454555	0.57	0.48	1
Mtch1	0.00401032	0.536253	0.579	0.567	1
Kdm5a	0.00407535	0.383044	0.395	0.305	1
Tm9sf2	0.00408334	0.588658	0.623	0.625	1
Taf7	0.00422745	0.317421	0.377	0.261	1
Ehbp1l1	0.00484793	0.388079	0.272	0.186	1
Elk3	0.00528451	0.331215	0.702	0.673	1
Maged2	0.00535356	0.525327	0.263	0.171	1
Cpd	0.00553265	0.489908	0.439	0.354	1
Plxnd1	0.00566223	0.263567	0.518	0.378	1
Polr3gl	0.0058789	0.329586	0.289	0.199	1
Mtap1b	0.00595342	0.42797	0.333	0.239	1
Endod1	0.0064088	0.386404	0.281	0.186	1
Rcsd1	0.00670856	0.51616	0.412	0.312	1
Rasgrp3	0.00745999	0.377199	0.596	0.546	1
Tmem30a	0.00764736	0.53682	0.605	0.541	1
Hsp90aa1	0.00791022	0.455036	0.737	0.723	1
Mfge8	0.00800469	0.540815	0.64	0.649	1
Adam10	0.011177	0.291807	0.702	0.709	1
Ddx58	0.0121113	0.253362	0.342	0.247	1
Sun2	0.0129487	0.294088	0.325	0.242	1
H1f0	0.0144887	0.444006	0.605	0.564	1
Irf9	0.0145223	0.313836	0.386	0.295	1
Ifnar2	0.014772	0.288523	0.579	0.522	1
Znfx1	0.0154952	0.338169	0.333	0.248	1
Parp9	0.0156622	0.387581	0.272	0.193	1
Myo1c	0.0164856	0.383891	0.553	0.499	1
Mef2a	0.0171712	0.403433	0.509	0.417	1
Prkch	0.0175148	0.383465	0.535	0.478	1
Cdc42ep2	0.0179307	0.511544	0.36	0.287	1
Cbfa2t3	0.0181468	0.309545	0.64	0.588	1
Macf1	0.0189588	0.254655	0.746	0.699	1
Efna1	0.0204968	0.476205	0.474	0.426	1
Lifr	0.0205	0.624747	0.561	0.49	1
Dtx3l	0.0206119	0.302755	0.351	0.27	1
Pitpna	0.0210088	0.340817	0.579	0.52	1
Oaz2	0.0210162	0.301837	0.658	0.601	1
H2-T24	0.0221409	0.290148	0.351	0.264	1
Stx2	0.0231266	0.448048	0.316	0.241	1
Bgn	0.0231521	0.369571	0.404	0.305	1
Wsb1	0.0243016	0.617221	0.439	0.39	1
Slc38a2	0.0243375	0.285361	0.588	0.504	1
Ppp1r16b	0.0245531	0.359328	0.711	0.7	1
Rpn2	0.0255564	0.421797	0.614	0.617	1
Laptm4b	0.0259994	0.508157	0.333	0.249	1
Klhl24	0.0266497	0.430764	0.526	0.45	1
Mtdh	0.0279817	0.301254	0.518	0.484	1
Btg2	0.0286763	0.434667	0.816	0.849	1
Gsk3b	0.0294108	0.27139	0.719	0.719	1
Dusp1	0.029571	0.291434	0.904	0.938	1
Etnk1	0.030182	0.309323	0.36	0.283	1
Clcn4-2	0.0301924	0.404361	0.386	0.297	1
Fam171a1	0.0308628	0.503692	0.333	0.273	1
Tra2b	0.0309647	0.30771	0.623	0.59	1
Alkbh5	0.0310468	0.394441	0.711	0.665	1
Clk1	0.0332467	0.332009	0.579	0.533	1
Tenc1	0.0332572	0.368458	0.561	0.495	1
Ifih1	0.0361847	0.528295	0.342	0.278	1
Itga5	0.0366007	0.259033	0.342	0.271	1
Gbp7	0.0373866	0.338454	0.579	0.521	1
Tmem184b	0.0377142	0.375957	0.535	0.509	1
Arhgap27	0.0390112	0.254133	0.316	0.238	1
Rc3h1	0.0395527	0.433563	0.386	0.315	1
Entpd1	0.0408777	0.468277	0.474	0.392	1
Adamts1	0.0422052	0.423951	0.614	0.579	1
Cdv3	0.0454162	0.488731	0.579	0.575	1
Ilf3	0.0463074	0.506206	0.307	0.25	1
Slc38a10	0.0485742	0.327162	0.333	0.277	1
Isg15	0.0485773	0.303258	0.377	0.326	1
2019-09-11	0.0497318	0.35284	0.518	0.474	1
Ube3a	0.0521507	0.327863	0.368	0.303	1
Usp22	0.0532164	0.281369	0.202	0.292	1
Nosip	0.059647	0.274168	0.386	0.323	1
Adss	0.0603924	0.380241	0.263	0.209	1
Napa	0.0629547	0.2822	0.465	0.392	1
Baiap2	0.0635661	0.303489	0.307	0.233	1
Robo4	0.0694811	0.438849	0.596	0.58	1
Rap1b	0.0701918	0.291723	0.746	0.735	1
Pea15a	0.0704874	0.33193	0.667	0.717	1
Hk1	0.0726562	0.259385	0.342	0.292	1
Ralb	0.078635	0.265209	0.526	0.491	1
Nfat5	0.079357	0.253897	0.368	0.307	1
Cx3cl1	0.0825603	0.465137	0.333	0.272	1
Fam18b	0.0828648	0.47041	0.254	0.204	1
Tspan14	0.0839271	0.593633	0.351	0.31	1
3230401D17Rik	0.0860871	0.268109	0.342	0.289	1
Ivns1abp	0.0869819	0.28664	0.404	0.342	1
Als2cl	0.0883732	0.308077	0.272	0.217	1
Amotl1	0.0888521	0.345515	0.5	0.452	1
Dnajb1	0.094453	0.319335	0.509	0.463	1
Pxk	0.0963013	0.30557	0.325	0.277	1
Uba7	0.0979701	0.319535	0.289	0.235	1
Map2k1	0.0995822	0.360715	0.316	0.266	1
Bcl2l1	0.103	0.405014	0.588	0.602	1
Ndel1	0.103291	0.42736	0.579	0.561	1
Mef2c	0.104358	0.333562	0.509	0.458	1
Ubr2	0.105541	0.258164	0.351	0.291	1
Strn4	0.105876	0.512362	0.316	0.283	1
Rell1	0.109914	0.311251	0.377	0.335	1
Arl8b	0.110676	0.362932	0.377	0.307	1
Nufip2	0.11672	0.556338	0.553	0.554	1
Chmp1b	0.121169	0.334234	0.272	0.226	1
4930414L22Rik	0.123495	0.316199	0.254	0.212	1
Pias1	0.12594	0.479593	0.333	0.306	1
Aff4	0.126183	0.318988	0.412	0.35	1
Smpdl3a	0.128194	0.402859	0.5	0.494	1
Tob1	0.13123	0.264536	0.447	0.395	1
Olfml3	0.131643	0.352114	0.281	0.214	1
Mcl1	0.132289	0.255775	0.649	0.68	1
Sat1	0.133277	0.63011	0.623	0.665	1
Wdfy3	0.135424	0.310753	0.281	0.233	1
Smtn	0.135723	0.359325	0.447	0.415	1
Cdc42ep1	0.13955	0.266796	0.614	0.619	1
Gnl3l	0.14118	0.276702	0.298	0.259	1
Ppp2r1a	0.142824	0.270945	0.596	0.572	1
Atp6v1h	0.149852	0.257372	0.325	0.28	1
Rab18	0.152105	0.269123	0.526	0.504	1
Scyl1	0.15417	0.537067	0.289	0.249	1
Larp4	0.15879	0.379326	0.281	0.236	1
Ube2h	0.165143	0.267816	0.342	0.454	1
Erg	0.165678	0.308244	0.36	0.326	1
Ninj1	0.16689	0.275978	0.342	0.295	1
2810403A07Rik	0.173474	0.318358	0.421	0.388	1
Ecm1	0.174431	0.265508	0.325	0.405	1
Arhgap1	0.181085	0.414665	0.333	0.286	1
Mfng	0.181903	0.368763	0.333	0.301	1
Tcf25	0.182278	0.260403	0.421	0.532	1
Lrrc8c	0.18233	0.48247	0.439	0.419	1
Pttg1ip	0.196363	0.309004	0.658	0.669	1
Csrnp1	0.200386	0.468158	0.386	0.379	1
Zmynd8	0.201298	0.265898	0.351	0.32	1
Igtp	0.203406	0.419473	0.368	0.315	1
Ganab	0.207322	0.27825	0.254	0.217	1
Gbp9	0.210507	0.310045	0.316	0.266	1
Stat6	0.217096	0.435714	0.281	0.257	1
Tug1	0.218544	0.298806	0.272	0.23	1
Hyal2	0.220806	0.32713	0.474	0.442	1
Lpp	0.228787	0.345873	0.351	0.315	1
Clptm1	0.231234	0.441578	0.439	0.449	1
Pear1	0.244223	0.425035	0.289	0.26	1
Hnrnph1	0.250023	0.319202	0.561	0.519	1
Letm1	0.251172	0.457212	0.263	0.238	1
Lphn2	0.254074	0.308477	0.395	0.361	1
Inpp5k	0.254355	0.26585	0.351	0.308	1
Myo6	0.258711	0.299774	0.447	0.419	1
Klf7	0.258893	0.262118	0.491	0.494	1
Exosc10	0.261049	0.462179	0.289	0.254	1
Cd74	0.265533	0.550493	0.386	0.375	1
Med1	0.283718	0.339775	0.43	0.434	1
Serping1	0.285725	0.36472	0.254	0.297	1
Nucb1	0.288902	0.253052	0.579	0.568	1
Nckap1	0.291057	0.300477	0.351	0.346	1
Cdk17	0.297526	0.400146	0.386	0.355	1
Secisbp2l	0.298505	0.378181	0.412	0.386	1
Tmem126a	0.303742	0.325741	0.325	0.316	1
Ccnt1	0.322553	0.276248	0.298	0.271	1
Hexa	0.327109	0.328313	0.447	0.424	1
Gaa	0.33224	0.352114	0.272	0.248	1
Csnk2a1	0.333141	0.330032	0.561	0.615	1
2900097C17Rik	0.335065	0.376926	0.351	0.324	1
Unc93b1	0.338072	0.293456	0.263	0.323	1
Rlim	0.339352	0.271863	0.43	0.417	1
Dnajb9	0.339764	0.438022	0.36	0.361	1
Stt3a	0.341128	0.31142	0.333	0.421	1
Lima1	0.342609	0.355926	0.386	0.378	1
Scaf11	0.344023	0.278242	0.289	0.354	1
Tram1	0.346983	0.305054	0.535	0.522	1
Ythdf1	0.352144	0.274184	0.254	0.228	1
Itfg1	0.359114	0.345977	0.342	0.304	1
Stat1	0.360682	0.278986	0.404	0.387	1
Akap8	0.365262	0.379138	0.254	0.242	1
Filip1l	0.367953	0.347385	0.333	0.316	1
Tap1	0.37291	0.289201	0.307	0.278	1
Shoc2	0.373155	0.287744	0.298	0.283	1
Vgll4	0.374452	0.278031	0.351	0.326	1
Csnk1d	0.385667	0.407304	0.333	0.32	1
Armc1	0.386809	0.30008	0.254	0.234	1
Ythdf2	0.40213	0.338432	0.421	0.398	1
Pros1	0.405261	0.251342	0.465	0.493	1
Ebf1	0.411586	0.333961	0.342	0.318	1
Nid1	0.411986	0.260946	0.412	0.401	1
Tmem127	0.422754	0.324589	0.421	0.386	1
Golgb1	0.433444	0.266075	0.289	0.27	1
Dok4	0.456777	0.258377	0.254	0.238	1
Kbtbd2	0.45831	0.367716	0.298	0.302	1
Actr1a	0.471035	0.29379	0.333	0.4	1
Amfr	0.477888	0.529446	0.342	0.343	1
Wls	0.477991	0.349515	0.237	0.295	1
Hnrnph2	0.490387	0.303702	0.404	0.376	1
Srrm2	0.500394	0.41311	0.772	0.804	1
Herpud1	0.502453	0.295548	0.491	0.525	1
Rnf13	0.51915	0.387879	0.325	0.315	1
Stom	0.528603	0.309924	0.298	0.301	1
Gosr2	0.534624	0.31398	0.219	0.278	1
Pvr	0.534644	0.376647	0.272	0.256	1
Tpp2	0.537145	0.305362	0.289	0.288	1
Bcar1	0.54746	0.329734	0.342	0.336	1
Sdha	0.548637	0.290212	0.456	0.501	1
Psmd1	0.549599	0.433604	0.377	0.41	1
Mgat1	0.586327	0.290239	0.377	0.385	1
Serinc1	0.588965	0.366391	0.535	0.618	1
Tmbim1	0.615993	0.296423	0.43	0.497	1
Sar1a	0.617572	0.265679	0.439	0.497	1
Asah1	0.622859	0.276917	0.404	0.408	1
Lrch1	0.657462	0.37681	0.307	0.318	1
Nsd1	0.663879	0.265202	0.395	0.396	1
Pcnp	0.667873	0.252076	0.57	0.619	1
Lmbrd1	0.691025	0.377364	0.368	0.407	1
Fkbp9	0.69441	0.313298	0.325	0.365	1
Tmx1	0.700205	0.278791	0.263	0.309	1
Zbtb20	0.711982	0.320239	0.404	0.414	1
Tor1aip2	0.730148	0.26995	0.333	0.348	1
Gbp2	0.740518	0.366201	0.342	0.399	1
Snx9	0.741776	0.252365	0.254	0.26	1
Nfkb1	0.747792	0.337497	0.254	0.248	1
Hspa9	0.750862	0.341749	0.36	0.381	1
2010106G01Rik	0.752362	0.304682	0.482	0.496	1
Stx7	0.763136	0.293341	0.351	0.373	1
Sec61a1	0.780438	0.355973	0.465	0.54	1
Tcp1	0.808255	0.306276	0.36	0.371	1
Ghitm	0.809228	0.308773	0.518	0.566	1
Gnaq	0.816073	0.377255	0.535	0.566	1
Kars	0.829073	0.350578	0.386	0.419	1
Glyr1	0.830795	0.30005	0.237	0.263	1
Plcb1	0.836208	0.296307	0.237	0.261	1
Ppp2r5c	0.895866	0.334678	0.421	0.473	1
Ss18	0.915902	0.322684	0.246	0.264	1
Rsl1d1	0.918294	0.354178	0.272	0.285	1
Sumo3	0.965353	0.265636	0.404	0.439	1
Ccnl2	0.973206	0.263611	0.272	0.291	1
Itsn2	0.979228	0.397488	0.342	0.39	1
Ergic1	0.983223	0.341524	0.263	0.273	1
Tap2	0.988591	0.269145	0.447	0.507	1
Atf7ip	0.995022	0.28123	0.316	0.324	1

## Sheet: Liver
	p_val	avg_logFC	pct.1	pct.2	p_val_adj
Dnase1l3	0	4.9312	0.978	0.024	0
Clec4g	0	4.64056	0.984	0.018	0
Fcgr2b	0	3.44556	0.962	0.045	0
Stab2	0	3.43463	0.973	0.017	0
Mrc1	0	3.39005	0.984	0.046	0
Oit3	0	3.14153	0.962	0.013	0
F8	0	2.86173	0.973	0.045	0
Plxnc1	0	2.39753	0.978	0.041	0
Bmp2	0	2.38939	0.967	0.032	0
Adam23	0	1.89129	0.945	0.033	0
Maf	0	1.84992	0.978	0.067	0
Gm4980	0	1.80292	0.891	0.056	0
Clec1b	0	1.50874	0.792	0.021	0
Aass	0	1.49807	0.798	0.01	0
Il1a	0	1.43994	0.656	0.013	0
Msr1	0	1.42409	0.639	0.008	0
Serpina3f	0	1.2546	0.601	0.009	0
Gata4	0	1.16287	0.705	0.026	0
Tmem132e	0	0.767246	0.432	0.001	0
Wnt2	1.03994e-298	1.72492	0.585	0.02	2.23326e-294
Serpina3g	2.97284e-292	2.23424	0.721	0.039	6.38417e-288
Masp1	6.40733e-286	0.640921	0.437	0.007	1.37597e-281
Gpr77	2.51648e-285	0.797883	0.749	0.043	5.40415e-281
Cd55	6.508e-278	2.63447	0.967	0.108	1.39759e-273
Saa2	2.3607e-275	0.657481	0.481	0.012	5.06961e-271
Gm14023	8.26821e-275	0.806477	0.464	0.01	1.7756e-270
Hgf	2.52119e-271	0.462059	0.475	0.011	5.41426e-267
Ehd3	5.9235e-270	2.82672	0.989	0.113	1.27207e-265
Fam167b	3.52898e-260	2.03266	0.923	0.094	7.57848e-256
Enpep	1.10421e-259	1.2316	0.749	0.049	2.3713e-255
Slc9a9	7.76506e-258	1.0033	0.541	0.021	1.66755e-253
Mup20	1.91173e-250	1.37485	0.667	0.042	4.10544e-246
Saa1	6.77429e-249	0.637165	0.536	0.022	1.45478e-244
Mup7	9.33831e-245	0.638472	0.552	0.025	2.0054e-240
Fgb	1.46199e-242	1.17174	0.617	0.035	3.13963e-238
Tmem106a	9.78872e-236	1.54042	0.836	0.079	2.10213e-231
Hmha1	5.4456e-234	1.07088	0.705	0.054	1.16944e-229
Dpp4	2.92739e-232	2.17081	0.94	0.121	6.28657e-228
Zbtb39	5.34533e-219	0.457147	0.781	0.073	1.14791e-214
2310014F07Rik	3.13789e-216	0.488393	0.295	0.003	6.73863e-212
Hs3st3b1	9.75451e-210	1.08567	0.634	0.044	2.09478e-205
Cd84	4.07738e-207	0.712128	0.492	0.024	8.75618e-203
AI607873	1.32303e-206	0.914892	0.628	0.045	2.84122e-202
Cnr2	2.54203e-202	0.80893	0.437	0.017	5.45901e-198
Col13a1	2.83291e-202	0.778373	0.634	0.045	6.08367e-198
Fga	5.17139e-198	0.871809	0.454	0.02	1.11056e-193
Mup3	3.79437e-197	1.34532	0.667	0.059	8.14841e-193
Akr1b8	1.62526e-195	1.13948	0.503	0.028	3.49024e-191
Gpr97	4.70405e-191	1.45647	0.765	0.082	1.01019e-186
Apoa1	5.0715e-190	1.35927	0.65	0.058	1.0891e-185
Alb	1.33725e-189	1.93674	0.76	0.087	2.87173e-185
C1qtnf1	2.98296e-189	1.62825	0.902	0.129	6.40591e-185
Fam124a	1.69112e-188	1.38535	0.699	0.066	3.63169e-184
Apoa2	9.81684e-176	0.77737	0.601	0.054	2.10817e-171
Tns3	6.9898e-175	0.828661	0.672	0.067	1.50106e-170
Itga9	4.60161e-170	1.15239	0.847	0.119	9.88195e-166
Myo7a	4.63502e-170	1.05051	0.661	0.066	9.95371e-166
Gpr182	4.9696e-168	2.66465	0.978	0.249	1.06722e-163
Itga8	1.88809e-164	0.550035	0.355	0.014	4.05468e-160
Mug1	6.81385e-160	0.385795	0.339	0.013	1.46327e-155
Npl	2.64078e-157	0.773025	0.344	0.014	5.67107e-153
Ifi204	7.73028e-153	0.824075	0.612	0.061	1.66008e-148
Dse	1.06364e-152	0.655954	0.486	0.037	2.28417e-148
Serpina3k	2.39053e-152	1.69456	0.568	0.056	5.13365e-148
Cotl1	3.03534e-150	0.747587	0.776	0.12	6.51839e-146
Serpina1c	3.25022e-149	0.944645	0.415	0.026	6.97985e-145
Arrb2	1.57328e-148	0.361447	0.65	0.075	3.37861e-144
Pzp	7.25664e-145	0.42434	0.344	0.016	1.55836e-140
Hpx	1.07751e-143	1.70542	0.475	0.039	2.31396e-139
Apoc1	4.24217e-141	0.535945	0.448	0.033	9.11007e-137
Ralgapa2	1.58809e-140	1.07272	0.743	0.112	3.41043e-136
Ap1b1	1.55514e-139	1.12115	0.918	0.192	3.33967e-135
Sgpp1	3.3556e-139	1.00412	0.732	0.109	7.20615e-135
Hpse	1.34425e-137	0.531421	0.311	0.013	2.88679e-133
Gatm	3.73476e-136	1.57223	0.918	0.196	8.0204e-132
Iqgap2	4.80242e-136	0.71234	0.388	0.024	1.03132e-131
Man2a1	3.07803e-134	1.30871	0.934	0.219	6.61006e-130
Gc	7.99313e-133	1.26363	0.492	0.047	1.71652e-128
Flrt1	4.58564e-132	0.383486	0.268	0.009	9.84767e-128
1600021P15Rik	3.01641e-131	0.545318	0.393	0.026	6.47774e-127
Slc43a2	1.23504e-129	1.00155	0.601	0.075	2.65225e-125
Pla2r1	4.10015e-129	0.651576	0.355	0.021	8.80506e-125
Serpina1e	8.52152e-129	1.17192	0.437	0.036	1.83e-124
Cntfr	2.25557e-122	0.487119	0.322	0.018	4.84384e-118
Emilin1	3.37218e-118	1.17489	0.803	0.153	7.24176e-114
Zmynd15	7.18936e-116	0.582412	0.421	0.036	1.54392e-111
Tfpi	1.10622e-114	1.24176	0.787	0.155	2.37561e-110
Fgg	3.8674e-114	1.11052	0.432	0.041	8.30523e-110
Stab1	7.95778e-112	2.07037	0.978	0.436	1.70893e-107
Smap2	1.12006e-108	0.780126	0.831	0.194	2.40533e-104
Darc	7.97105e-108	0.754706	0.317	0.02	1.71178e-103
Apoc3	1.72811e-105	0.495773	0.273	0.015	3.71112e-101
Bace2	2.17307e-105	1.24488	0.749	0.145	4.66667e-101
Marcksl1	4.36316e-105	0.762452	0.787	0.172	9.36989e-101
Lhfpl2	1.52041e-104	1.00826	0.628	0.103	3.26508e-100
Lgmn	1.34295e-103	1.7404	0.951	0.387	2.88398e-99
Sepp1	4.64788e-103	2.04981	0.995	0.928	9.98132e-99
Fgd6	8.09957e-98	0.616431	0.546	0.079	1.73938e-93
Il6st	9.9985e-98	1.70128	0.951	0.396	2.14718e-93
Gm4951	3.02049e-97	0.821019	0.568	0.085	6.4865e-93
Kit	4.5973e-97	1.11677	0.645	0.118	9.8727e-93
Igfbp4	2.54808e-95	1.37983	0.984	0.375	5.47201e-91
Dab2	2.49345e-94	1.178	0.896	0.268	5.35468e-90
Mertk	1.09455e-93	1.09793	0.689	0.141	2.35055e-89
Cxcl16	1.51445e-93	1.22276	0.781	0.185	3.25227e-89
Nqo2	2.4028e-92	1.08209	0.628	0.114	5.16001e-88
Fabp1	1.85993e-91	0.581596	0.372	0.038	3.99421e-87
Scamp5	4.83948e-90	0.299564	0.328	0.029	1.03928e-85
Kng1	7.28916e-89	0.595209	0.284	0.021	1.56535e-84
Ambp	1.13909e-88	0.650274	0.273	0.019	2.44621e-84
Hdc	3.35603e-88	0.903343	0.47	0.064	7.20707e-84
Ccdc80	1.00722e-87	1.15065	0.885	0.292	2.16301e-83
Flt4	1.06982e-87	1.16435	0.967	0.441	2.29745e-83
Jak1	1.16845e-87	1.62331	1	0.592	2.50924e-83
Apoe	4.00539e-87	1.54234	1	0.849	8.60157e-83
Man1a	5.29948e-87	0.739465	0.617	0.12	1.13806e-82
Nr2f2	7.68947e-86	0.81558	0.907	0.265	1.65131e-81
Tmem2	9.36096e-86	1.24231	0.967	0.402	2.01027e-81
Cyp26b1	1.47583e-85	0.931895	0.667	0.141	3.16935e-81
Mmp14	3.41605e-85	0.988087	0.623	0.128	7.33596e-81
Lifr	8.38459e-84	1.5982	0.973	0.47	1.80059e-79
Cnksr3	1.93628e-83	0.530445	0.53	0.086	4.15816e-79
Slc29a1	2.83563e-82	1.49507	0.94	0.394	6.08951e-78
Agpat5	2.80598e-81	0.693773	0.792	0.201	6.02584e-77
Chst15	4.12961e-81	0.966911	0.612	0.121	8.86834e-77
Ccdc152	9.56304e-81	0.306512	0.426	0.058	2.05366e-76
Id4	6.47276e-80	0.682077	0.415	0.055	1.39002e-75
Fam174b	2.05019e-79	1.05126	0.612	0.124	4.40278e-75
Inhbb	4.31619e-79	0.496774	0.399	0.05	9.26902e-75
Bend4	6.8088e-79	0.623795	0.262	0.02	1.46219e-74
Serpina1b	2.44567e-78	0.675567	0.301	0.028	5.25207e-74
Meis2	3.172e-78	0.611275	0.601	0.115	6.81188e-74
Ptprb	3.49478e-78	1.34343	0.973	0.838	7.50504e-74
Slc39a8	6.5656e-78	0.684568	0.53	0.092	1.40996e-73
Tbx2	1.16514e-77	0.530273	0.432	0.058	2.50214e-73
Shroom2	2.06546e-77	0.717491	0.443	0.065	4.43558e-73
Psen2	3.64756e-77	1.04423	0.732	0.185	7.83314e-73
Serpina1d	5.18774e-76	0.771701	0.268	0.023	1.11407e-71
Igfbp7	6.75931e-76	1.13473	0.989	0.853	1.45156e-71
Itsn1	9.4337e-76	0.505015	0.497	0.085	2.02589e-71
F2r	9.89945e-73	0.577863	0.842	0.231	2.12591e-68
Lamp2	1.81175e-72	1.38267	0.973	0.548	3.89073e-68
Gnpda1	2.6425e-72	0.748319	0.361	0.045	5.67477e-68
Gm7609	1.6317e-71	0.498554	0.355	0.045	3.50407e-67
Degs1	9.04657e-71	1.30758	0.973	0.52	1.94275e-66
Clec9a	3.24174e-70	0.491898	0.443	0.07	6.96164e-66
Tmem64	1.08983e-68	0.671426	0.672	0.173	2.34041e-64
Hp	1.50738e-68	1.2095	0.372	0.054	3.23709e-64
Ctsl	2.60743e-68	1.49558	0.962	0.747	5.59945e-64
Rnd3	2.63365e-68	0.633147	0.546	0.115	5.65577e-64
Slc40a1	2.94095e-66	0.607065	0.628	0.138	6.3157e-62
Fcgrt	8.11738e-66	1.27244	0.984	0.569	1.74321e-61
Ces2g	1.32318e-64	0.532019	0.437	0.073	2.84152e-60
Mt1	3.18102e-64	0.689292	0.918	0.435	6.83123e-60
Hecw2	8.23257e-64	0.73465	0.705	0.195	1.76794e-59
Snx24	1.08969e-63	0.367806	0.322	0.04	2.34012e-59
Slc38a6	1.13135e-63	0.402285	0.361	0.052	2.42958e-59
Armcx4	3.71884e-62	0.478349	0.29	0.033	7.9862e-58
Man2b1	5.33063e-62	0.990412	0.76	0.25	1.14475e-57
Lcp2	1.07124e-60	0.467481	0.273	0.031	2.3005e-56
Mfsd5	2.97782e-60	0.869269	0.863	0.329	6.39488e-56
Snx5	3.38308e-60	0.928605	0.765	0.257	7.26516e-56
Ppap2b	1.5073e-59	1.05566	0.978	0.694	3.23693e-55
Chst2	2.43856e-59	0.685461	0.53	0.116	5.2368e-55
Slc25a37	9.55469e-59	0.40496	0.432	0.079	2.05187e-54
Kcnb1	1.86815e-58	0.56575	0.514	0.111	4.01184e-54
Acer3	7.6106e-58	0.644295	0.59	0.145	1.63438e-53
Lyve1	9.85795e-58	0.515015	0.661	0.162	2.117e-53
Trf	1.37253e-56	1.72864	0.863	0.428	2.9475e-52
Plxnd1	1.60807e-56	0.742743	0.88	0.359	3.45333e-52
Gpr155	1.82254e-56	0.282638	0.333	0.049	3.91391e-52
Ap2s1	6.698e-56	0.796163	0.874	0.408	1.4384e-51
Cd302	5.82312e-55	0.872706	0.607	0.177	1.25052e-50
Ifitm2	6.29151e-55	0.737524	0.984	0.937	1.3511e-50
Rcn1	1.30973e-54	1.02076	0.716	0.241	2.81265e-50
Arhgap23	1.45434e-54	0.509378	0.617	0.178	3.1232e-50
Zeb2	1.55755e-54	0.53827	0.448	0.094	3.34485e-50
Fyn	5.18887e-54	0.80207	0.842	0.31	1.11431e-49
Nrp2	5.87173e-54	0.71978	0.858	0.325	1.26095e-49
Mlxip	7.23739e-54	0.647013	0.71	0.224	1.55423e-49
P2ry1	1.30365e-53	0.450087	0.251	0.029	2.79958e-49
Cd38	1.16258e-52	0.908601	0.962	0.462	2.49663e-48
Fam178a	4.65853e-52	0.734487	0.798	0.307	1.00042e-47
Arhgdib	8.6001e-52	1.00734	0.781	0.334	1.84687e-47
Bgn	9.36635e-51	0.789523	0.76	0.287	2.01142e-46
Cd59a	1.29442e-50	0.901088	0.869	0.37	2.77976e-46
Fcer1g	1.66213e-50	0.775908	0.443	0.107	3.56942e-46
Plekhg1	1.84956e-50	0.798273	0.776	0.303	3.97194e-46
Lgals1	2.79532e-50	0.67821	0.628	0.218	6.00295e-46
Kdr	3.94827e-50	0.946889	0.978	0.747	8.47891e-46
Fmnl2	4.73357e-50	0.609827	0.59	0.168	1.01653e-45
Kcnk6	4.77374e-50	0.455216	0.41	0.083	1.02516e-45
Sirpa	5.54835e-50	0.690353	0.454	0.105	1.19151e-45
Gimap4	5.95576e-50	0.822623	0.956	0.467	1.279e-45
Ttr	1.83642e-49	0.596034	0.404	0.086	3.94371e-45
Gja4	3.92089e-49	0.924316	0.639	0.193	8.42012e-45
Ppap2a	4.95442e-49	1.09768	0.951	0.657	1.06396e-44
Tcn2	9.46325e-49	1.18991	0.929	0.61	2.03223e-44
Raph1	3.39133e-48	0.76256	0.71	0.259	7.28287e-44
Snx2	7.55532e-48	0.882391	0.836	0.354	1.62251e-43
Ada	9.76716e-48	0.815957	0.35	0.064	2.0975e-43
Npr1	8.45536e-47	0.646064	0.831	0.336	1.81579e-42
Sh3bp5	5.13921e-46	0.71788	0.896	0.376	1.10365e-41
Sema6a	2.6891e-45	0.80686	0.945	0.489	5.77485e-41
Wdr59	2.69483e-45	0.300038	0.388	0.081	5.78714e-41
Cpne2	4.45641e-45	0.702907	0.601	0.188	9.57015e-41
St3gal4	8.56107e-45	0.688118	0.568	0.166	1.83849e-40
Cyp4b1	1.39422e-44	0.734776	0.956	0.537	2.99408e-40
Adamts7	2.23801e-44	0.503022	0.284	0.045	4.80612e-40
Calml4	2.72862e-44	0.306773	0.284	0.045	5.85972e-40
C230081A13Rik	1.1257e-43	0.78056	0.776	0.316	2.41744e-39
Pisd-ps3	1.48013e-43	0.76103	0.814	0.362	3.17857e-39
Hipk2	1.67918e-43	0.35449	0.47	0.119	3.60605e-39
Dcbld1	1.96233e-43	0.524944	0.525	0.139	4.21411e-39
Ralgps2	2.14859e-43	0.398279	0.295	0.05	4.6141e-39
Olfm1	3.60806e-43	0.612619	0.383	0.084	7.74831e-39
Calr	4.51152e-43	1.00941	0.978	0.808	9.68848e-39
Slco2a1	4.93634e-43	0.282209	0.607	0.175	1.06008e-38
Ptgs1	6.35929e-43	0.841411	0.667	0.233	1.36566e-38
Lrrc32	7.31481e-43	0.673851	0.716	0.259	1.57086e-38
Cltc	3.65836e-42	0.907649	0.923	0.573	7.85633e-38
Ankrd44	8.21915e-42	0.39442	0.585	0.178	1.76506e-37
Aldob	9.91855e-42	1.16072	0.279	0.048	2.13001e-37
Mylip	1.26194e-41	0.822777	0.814	0.366	2.71002e-37
Renbp	1.78967e-41	0.874699	0.421	0.104	3.84333e-37
Snx8	3.82566e-41	0.496192	0.284	0.048	8.21561e-37
Aqp1	6.32431e-41	0.533439	0.978	0.546	1.35814e-36
Atp2b4	1.37209e-40	0.449855	0.661	0.231	2.94656e-36
Ctsb	1.60763e-40	0.821712	1	0.785	3.45239e-36
Sash1	1.75448e-40	0.470372	0.885	0.442	3.76775e-36
Serpinc1	1.97252e-40	0.573949	0.251	0.039	4.23598e-36
Spint2	2.86288e-40	0.711457	0.59	0.211	6.14803e-36
St3gal5	4.13631e-40	0.492491	0.546	0.159	8.88272e-36
Prkcq	7.41823e-40	0.357878	0.262	0.043	1.59307e-35
Casp1	9.05723e-40	0.53861	0.322	0.062	1.94504e-35
Rgl1	9.67959e-40	0.632005	0.787	0.338	2.07869e-35
Psd3	1.16356e-39	0.430119	0.393	0.093	2.49875e-35
Clta	3.0055e-39	0.776573	0.902	0.515	6.45432e-35
Prr5l	3.09404e-39	0.514528	0.432	0.108	6.64445e-35
Ctdspl	3.15732e-39	0.376193	0.388	0.089	6.78034e-35
Athl1	6.8946e-39	0.477129	0.388	0.09	1.48062e-34
Macf1	9.93501e-39	0.809879	0.978	0.688	2.13354e-34
Mt2	1.23766e-38	0.318525	0.678	0.273	2.65787e-34
Snx13	4.25148e-38	0.557187	0.557	0.181	9.13005e-34
Epb4.1l2	8.95801e-38	0.556758	0.787	0.344	1.92373e-33
Pde2a	9.78541e-38	0.795547	0.896	0.464	2.10142e-33
Gas7	1.53587e-37	0.626865	0.497	0.16	3.29828e-33
Golga7	3.74804e-37	0.797403	0.765	0.35	8.04891e-33
Pcdh12	1.23317e-36	0.443089	0.53	0.161	2.64823e-32
Cmtm8	1.64562e-36	0.703726	0.825	0.4	3.53396e-32
Rbp4	1.98151e-36	0.544019	0.251	0.045	4.25529e-32
Slc7a7	2.00812e-36	0.617899	0.366	0.086	4.31244e-32
Mbd1	4.80795e-36	0.483702	0.47	0.143	1.03251e-31
Lgals3bp	9.67188e-36	0.833857	0.896	0.499	2.07704e-31
3200002M19Rik	1.15925e-35	0.290549	0.279	0.051	2.48949e-31
Il13ra1	2.3118e-35	0.511235	0.454	0.129	4.96459e-31
Eif2c3	2.61911e-35	0.406322	0.454	0.127	5.62454e-31
Tpp1	5.51859e-35	0.839125	0.831	0.412	1.18512e-30
Mtss1	3.9009e-34	0.494376	0.798	0.378	8.37719e-30
C3	4.37205e-34	0.314267	0.388	0.109	9.38897e-30
Arrb1	5.46286e-34	0.509934	0.448	0.132	1.17315e-29
Xpc	6.8135e-34	0.333289	0.421	0.114	1.4632e-29
Vps13c	9.53786e-34	0.309212	0.437	0.124	2.04826e-29
Ahsg	1.14378e-33	0.378632	0.339	0.078	2.45627e-29
Phldb2	1.69994e-33	0.582141	0.727	0.307	3.65063e-29
Rn45s	1.82961e-33	0.347988	1	1	3.92909e-29
Ly96	2.92281e-33	0.335904	0.339	0.079	6.27674e-29
Tinagl1	3.47028e-33	0.719264	0.984	0.8	7.45243e-29
BC017647	4.41167e-33	0.541405	0.557	0.196	9.47407e-29
Fchsd2	7.77856e-33	0.473396	0.404	0.114	1.67045e-28
Ftl1	1.306e-32	0.602279	1	0.981	2.80463e-28
Agfg2	1.4454e-32	0.468392	0.339	0.082	3.104e-28
Hspg2	2.32545e-32	0.264116	0.913	0.484	4.9939e-28
Pros1	2.61818e-32	0.744591	0.852	0.476	5.62254e-28
Nptn	7.47314e-32	0.65154	0.792	0.412	1.60486e-27
P2rx4	1.67278e-31	0.527881	0.486	0.158	3.5923e-27
Hsp90b1	4.72125e-31	0.751948	0.956	0.81	1.01389e-26
Sdf2l1	6.25207e-31	0.696173	0.41	0.127	1.34263e-26
Vamp5	8.70099e-31	0.623026	0.781	0.392	1.86854e-26
Me2	1.57981e-30	0.356604	0.355	0.093	3.39264e-26
Prickle1	1.88449e-30	0.529829	0.727	0.325	4.04695e-26
Clec14a	2.06729e-30	0.595134	0.907	0.511	4.43951e-26
6430548M08Rik	3.17452e-30	0.554175	0.448	0.138	6.81727e-26
Arhgef7	4.88945e-30	0.53483	0.634	0.268	1.05001e-25
Armcx1	5.04761e-30	0.410298	0.377	0.103	1.08398e-25
2510009E07Rik	8.24075e-30	0.336048	0.481	0.157	1.7697e-25
Slc43a3	1.46537e-29	0.763536	0.962	0.62	3.14688e-25
Pitpna	1.75474e-29	0.670025	0.874	0.505	3.7683e-25
Vtn	1.80033e-29	0.277533	0.268	0.057	3.8662e-25
Scarb2	1.96609e-29	0.697513	0.607	0.249	4.22218e-25
Stard8	1.98653e-29	0.569565	0.683	0.31	4.26608e-25
Il27ra	2.79975e-29	0.36758	0.279	0.061	6.01247e-25
Srgap1	4.6107e-29	0.289875	0.355	0.098	9.90147e-25
Stx2	5.12158e-29	0.306676	0.596	0.227	1.09986e-24
Elf1	6.08187e-29	0.641146	0.831	0.479	1.30608e-24
Zswim6	8.87182e-29	0.4125	0.432	0.14	1.90522e-24
Nid1	1.09328e-28	0.686474	0.754	0.385	2.34782e-24
Acer2	1.35759e-28	0.573739	0.787	0.391	2.91543e-24
Zfp715	2.28445e-28	0.291635	0.393	0.115	4.90586e-24
Nuak2	2.29274e-28	0.508163	0.295	0.071	4.92367e-24
Hist1h1e	3.28882e-28	0.366071	0.585	0.244	7.06273e-24
Rab3il1	5.22105e-28	0.44292	0.35	0.096	1.12122e-23
Nt5dc3	5.56861e-28	0.311539	0.251	0.054	1.19586e-23
Cyb5	9.57701e-28	0.620754	0.923	0.662	2.05666e-23
Calm2	1.09694e-27	0.662616	0.978	0.879	2.35569e-23
Atrnl1	1.31253e-27	0.297328	0.257	0.056	2.81866e-23
Frmd4a	1.71093e-27	0.560333	0.437	0.146	3.67422e-23
Dpp7	4.18117e-27	0.483976	0.306	0.077	8.97906e-23
Casp4	5.76733e-27	0.347875	0.393	0.119	1.23853e-22
Ifi203	2.23618e-26	0.303374	0.71	0.325	4.8022e-22
Serinc3	2.3474e-26	0.471033	0.995	0.912	5.04104e-22
Lphn2	3.34384e-26	0.531478	0.699	0.346	7.1809e-22
Rrbp1	4.66144e-26	0.57907	0.929	0.634	1.00104e-21
Fam171a1	4.9841e-26	0.562792	0.617	0.259	1.07033e-21
Dlc1	5.90364e-26	0.58607	0.896	0.596	1.26781e-21
Uap1l1	7.95694e-26	0.500896	0.279	0.069	1.70875e-21
Znrf1	1.46679e-25	0.491906	0.749	0.369	3.14994e-21
Mgat1	1.4691e-25	0.61861	0.732	0.369	3.15489e-21
Bst2	4.08096e-25	0.427452	0.984	0.734	8.76387e-21
Ssx2ip	8.04252e-25	0.313674	0.262	0.063	1.72713e-20
Fut11	8.32797e-25	0.337724	0.563	0.219	1.78843e-20
Rab3gap2	8.97892e-25	0.255151	0.372	0.115	1.92822e-20
Klhl36	2.25304e-24	0.503061	0.251	0.059	4.83841e-20
Dennd4c	2.4169e-24	0.391077	0.35	0.11	5.1903e-20
Rreb1	3.38546e-24	0.298095	0.426	0.151	7.27028e-20
Csrp2	8.26654e-24	0.429657	0.639	0.288	1.77524e-19
Cdc27	9.31608e-24	0.431849	0.432	0.149	2.00063e-19
Tmem51	1.20226e-23	0.501796	0.273	0.072	2.58186e-19
Pdia3	1.20469e-23	0.6176	0.984	0.86	2.58706e-19
Rasal2	1.21834e-23	0.423429	0.738	0.38	2.61638e-19
Tnfrsf1a	1.79305e-23	0.565596	0.858	0.559	3.85057e-19
4932438A13Rik	2.72519e-23	0.296302	0.546	0.232	5.85235e-19
Mid1	2.72957e-23	0.373384	0.317	0.093	5.86176e-19
Cmtm3	4.33512e-23	0.499734	0.639	0.303	9.30967e-19
Fam20a	9.02247e-23	0.28185	0.29	0.079	1.93758e-18
Dchs1	1.07578e-22	0.515617	0.399	0.142	2.31023e-18
Nucb1	1.93121e-22	0.638757	0.836	0.556	4.14727e-18
Lrrc58	2.09485e-22	0.496454	0.956	0.815	4.49868e-18
Mndal	2.6639e-22	0.259118	0.754	0.39	5.72072e-18
Apc	3.47951e-22	0.621367	0.645	0.334	7.47225e-18
Tbc1d2b	4.81833e-22	0.328787	0.279	0.077	1.03474e-17
Tex2	5.40569e-22	0.320909	0.35	0.113	1.16087e-17
Msrb3	5.55039e-22	0.395434	0.612	0.291	1.19195e-17
Tgfbr3	6.3587e-22	0.313373	0.617	0.279	1.36553e-17
Bmp2k	7.18658e-22	0.345224	0.295	0.084	1.54332e-17
Blvrb	7.7376e-22	0.499785	0.475	0.2	1.66165e-17
Rfk	8.7763e-22	0.478344	0.776	0.425	1.88471e-17
Nt5c3	1.62476e-21	0.488225	0.415	0.154	3.48916e-17
Vcpip1	1.85987e-21	0.378747	0.372	0.126	3.99406e-17
Sema6d	1.95869e-21	0.381382	0.497	0.209	4.2063e-17
Rapgef5	2.25784e-21	0.375168	0.536	0.227	4.8487e-17
Cdc42ep2	2.46721e-21	0.650271	0.585	0.276	5.29833e-17
Gpihbp1	2.7529e-21	0.458236	0.973	0.688	5.91186e-17
Chst7	2.96552e-21	0.474556	0.328	0.101	6.36846e-17
Robo4	3.15888e-21	0.483	0.891	0.567	6.78369e-17
Hfe	3.19589e-21	0.498413	0.541	0.229	6.86317e-17
Sptlc2	4.4795e-21	0.451233	0.694	0.337	9.61974e-17
H2-T23	6.74141e-21	0.570286	0.973	0.759	1.44772e-16
Add3	6.95059e-21	0.354717	0.667	0.336	1.49264e-16
Cd47	7.01898e-21	0.520871	0.956	0.739	1.50733e-16
Nav1	7.75242e-21	0.45355	0.732	0.412	1.66483e-16
Trip12	1.18446e-20	0.461899	0.601	0.296	2.54364e-16
Lpar6	1.19838e-20	0.459026	0.689	0.345	2.57351e-16
Car8	1.20272e-20	0.36351	0.612	0.264	2.58284e-16
Lpp	1.50265e-20	0.391866	0.612	0.303	3.22695e-16
Hyal2	1.59664e-20	0.452823	0.803	0.427	3.42878e-16
Dnajc3	2.17198e-20	0.571092	0.836	0.563	4.66433e-16
Lrrc33	2.31946e-20	0.550099	0.481	0.204	4.98105e-16
Tle1	2.47814e-20	0.388811	0.454	0.182	5.32181e-16
Rell1	2.49351e-20	0.384429	0.639	0.322	5.35481e-16
Alox12	2.63736e-20	0.365567	0.279	0.079	5.66373e-16
Appl2	2.63755e-20	0.296074	0.306	0.094	5.66415e-16
C1ra	2.63778e-20	0.417189	0.311	0.101	5.66463e-16
Xiap	2.96685e-20	0.534972	0.803	0.518	6.37131e-16
Snap23	3.53851e-20	0.407373	0.579	0.264	7.59895e-16
Acap2	3.90265e-20	0.346467	0.65	0.324	8.38095e-16
Dpagt1	4.40114e-20	0.588798	0.519	0.232	9.45145e-16
Ap2a2	7.69542e-20	0.377304	0.847	0.524	1.65259e-15
B2m	9.2012e-20	0.295486	0.995	0.992	1.97596e-15
Myo10	1.04713e-19	0.467691	0.842	0.543	2.24872e-15
Ccbp2	1.32936e-19	0.290545	0.279	0.08	2.85481e-15
Il16	1.37934e-19	0.536529	0.306	0.1	2.96213e-15
Exoc3l	1.39998e-19	0.369181	0.322	0.102	3.00645e-15
Inpp5a	2.50022e-19	0.29143	0.661	0.328	5.36921e-15
Ckap4	2.51196e-19	0.332478	0.579	0.274	5.39444e-15
Map4k5	3.07742e-19	0.505599	0.454	0.197	6.60876e-15
Adarb1	4.21327e-19	0.415551	0.443	0.188	9.048e-15
Ctsd	4.52595e-19	0.552161	0.973	0.852	9.71948e-15
Gstk1	4.75025e-19	0.411108	0.366	0.131	1.02012e-14
Gns	8.14874e-19	0.386202	0.503	0.226	1.74994e-14
Vav3	9.02134e-19	0.271246	0.383	0.142	1.93733e-14
Stox2	9.60676e-19	0.350126	0.388	0.148	2.06305e-14
Rpn1	1.22929e-18	0.384908	0.825	0.542	2.63991e-14
Soat1	1.44004e-18	0.354363	0.262	0.08	3.0925e-14
Elk3	2.38989e-18	0.443401	0.891	0.664	5.13228e-14
Bmpr2	4.23118e-18	0.477699	0.503	0.232	9.08646e-14
Scpep1	5.5944e-18	0.541249	0.377	0.152	1.2014e-13
Pxdn	9.21731e-18	0.357159	0.601	0.301	1.97942e-13
Sord	1.36392e-17	0.517818	0.268	0.086	2.92901e-13
Kdelr2	1.40866e-17	0.506811	0.907	0.725	3.02509e-13
Hexa	1.77232e-17	0.628485	0.678	0.413	3.80607e-13
Sbf2	2.23976e-17	0.338518	0.503	0.235	4.80988e-13
Fam111a	2.60969e-17	0.298188	0.317	0.11	5.60432e-13
Rnf130	3.44471e-17	0.455999	0.825	0.543	7.39751e-13
Amotl1	3.60126e-17	0.54356	0.732	0.441	7.7337e-13
Strn4	4.1905e-17	0.545587	0.546	0.272	8.99909e-13
Gmpr	6.71228e-17	0.457667	0.257	0.079	1.44146e-12
Rere	6.90538e-17	0.396014	0.492	0.235	1.48293e-12
Rasgrp3	9.79097e-17	0.2575	0.852	0.533	2.10261e-12
Tet3	9.88406e-17	0.299448	0.432	0.188	2.1226e-12
Taok3	1.58299e-16	0.259322	0.317	0.115	3.39946e-12
Rod1	1.84975e-16	0.339376	0.82	0.537	3.97234e-12
Pear1	2.4086e-16	0.290107	0.519	0.249	5.17247e-12
Csf1	2.91147e-16	0.338791	0.421	0.179	6.25239e-12
Upp1	3.84017e-16	0.459382	0.377	0.148	8.24677e-12
Sft2d1	3.89845e-16	0.373386	0.672	0.38	8.37193e-12
Lpgat1	3.9513e-16	0.340842	0.333	0.128	8.48542e-12
Wasl	7.60354e-16	0.302323	0.596	0.328	1.63286e-11
Asah2	9.539e-16	0.313922	0.251	0.083	2.0485e-11
C1qc	1.51101e-15	0.31652	0.415	0.204	3.24488e-11
Tanc1	1.53508e-15	0.398217	0.612	0.335	3.29657e-11
Tmem30a	1.92056e-15	0.393034	0.809	0.531	4.1244e-11
Flnb	1.97355e-15	0.390412	0.727	0.445	4.2382e-11
Plxnb2	2.245e-15	0.320938	0.251	0.086	4.82114e-11
Cnp	2.48425e-15	0.45454	0.514	0.269	5.33493e-11
Nagk	3.72805e-15	0.360424	0.421	0.188	8.00598e-11
Neurl3	4.78454e-15	0.425851	0.29	0.103	1.02748e-10
Flcn	5.93712e-15	0.389086	0.333	0.131	1.275e-10
Pnp	7.85033e-15	0.415005	0.721	0.456	1.68586e-10
Tln1	8.70225e-15	0.370677	0.831	0.608	1.86881e-10
C1qb	8.9728e-15	0.62456	0.481	0.274	1.92691e-10
Scaf11	9.8316e-15	0.333224	0.612	0.34	2.11134e-10
Sec63	1.12324e-14	0.341802	0.59	0.318	2.41215e-10
Nrp1	1.16081e-14	0.294607	0.989	0.859	2.49284e-10
Chst14	1.17385e-14	0.369838	0.328	0.127	2.52084e-10
Aff1	1.4049e-14	0.310665	0.426	0.197	3.01702e-10
Dmwd	2.06966e-14	0.457527	0.421	0.196	4.44459e-10
Igsf3	2.126e-14	0.31591	0.257	0.089	4.56559e-10
Pxk	3.09351e-14	0.265977	0.53	0.267	6.6433e-10
Rin2	3.87747e-14	0.486274	0.514	0.269	8.32687e-10
Irf8	3.95681e-14	0.378517	0.339	0.141	8.49726e-10
Bok	4.35777e-14	0.534278	0.426	0.198	9.35831e-10
Hdac1	8.40651e-14	0.538516	0.65	0.39	1.8053e-09
Wls	1.03054e-13	0.301692	0.552	0.282	2.21308e-09
Mpp1	1.06882e-13	0.309485	0.432	0.197	2.2953e-09
Pdia4	1.19649e-13	0.30768	0.585	0.316	2.56946e-09
Zmiz1	2.08977e-13	0.349028	0.721	0.45	4.48779e-09
Dhrs3	3.11188e-13	0.306286	0.902	0.702	6.68275e-09
Cerk	3.28617e-13	0.269831	0.301	0.12	7.05704e-09
Bicd2	4.10764e-13	0.311666	0.541	0.285	8.82115e-09
Eif4ebp1	5.08011e-13	0.300196	0.41	0.2	1.09095e-08
Eps15	5.43509e-13	0.349241	0.486	0.259	1.16719e-08
Iqsec1	7.48471e-13	0.378829	0.601	0.376	1.60734e-08
Mgat4b	8.62893e-13	0.383524	0.437	0.217	1.85306e-08
Slk	1.02003e-12	0.295042	0.607	0.35	2.19052e-08
Exoc5	1.13205e-12	0.281918	0.459	0.233	2.43108e-08
Lamp1	1.16709e-12	0.337786	0.978	0.874	2.50632e-08
Rnf169	1.2851e-12	0.399204	0.377	0.178	2.75975e-08
Tmem9b	1.64599e-12	0.427075	0.672	0.409	3.53476e-08
Zzef1	1.76158e-12	0.253802	0.388	0.18	3.78299e-08
Asap1	2.00795e-12	0.377809	0.574	0.334	4.31208e-08
Pgm1	4.24322e-12	0.355031	0.41	0.198	9.11232e-08
Tek	4.31568e-12	0.320169	0.913	0.679	9.26793e-08
Bcar1	4.58736e-12	0.360141	0.568	0.326	9.85135e-08
Hspa5	6.92768e-12	0.400116	0.951	0.853	1.48772e-07
Pdia6	1.17532e-11	0.455752	0.842	0.65	2.52399e-07
Ddx17	1.24081e-11	0.267167	0.749	0.498	2.66463e-07
Canx	1.37872e-11	0.368364	0.94	0.797	2.96079e-07
Cdr2l	1.45448e-11	0.286298	0.377	0.179	3.12349e-07
Pml	1.61979e-11	0.416656	0.328	0.152	3.47851e-07
Srgap2	1.62041e-11	0.281272	0.514	0.292	3.47983e-07
Hmox2	1.82686e-11	0.397999	0.475	0.261	3.92319e-07
Pip4k2a	2.32667e-11	0.320141	0.306	0.136	4.99652e-07
Klhl6	2.86035e-11	0.317584	0.372	0.176	6.14261e-07
Rnase4	3.01163e-11	0.501324	0.475	0.283	6.46748e-07
Scarf1	3.40123e-11	0.336209	0.563	0.312	7.30413e-07
Spag9	3.64946e-11	0.279893	0.82	0.555	7.83721e-07
Ephb4	4.021e-11	0.292372	0.612	0.38	8.6351e-07
Wdfy3	4.29472e-11	0.280932	0.426	0.226	9.22291e-07
4632428N05Rik	5.5115e-11	0.30686	0.536	0.313	1.1836e-06
Dgkz	6.58431e-11	0.289693	0.514	0.302	1.41398e-06
Fat4	8.34763e-11	0.27923	0.383	0.197	1.79265e-06
Picalm	9.48823e-11	0.340106	0.749	0.557	2.0376e-06
Slc9a3r1	1.07106e-10	0.383745	0.311	0.146	2.30011e-06
Gpr116	1.09757e-10	0.261049	0.984	0.907	2.35702e-06
Rcn3	1.33459e-10	0.297987	0.393	0.202	2.86604e-06
Gimap6	1.42434e-10	0.273579	0.967	0.814	3.05878e-06
Insr	1.93112e-10	0.524093	0.432	0.242	4.14708e-06
Fndc3b	1.99115e-10	0.323748	0.372	0.188	4.27599e-06
Gsto1	2.02089e-10	0.425752	0.268	0.124	4.33985e-06
Taok2	2.19746e-10	0.268055	0.59	0.381	4.71904e-06
Usp8	2.22096e-10	0.31081	0.361	0.177	4.7695e-06
Ncstn	2.35948e-10	0.327631	0.574	0.349	5.06698e-06
Grn	3.07457e-10	0.312916	0.902	0.678	6.60265e-06
Gna13	3.16816e-10	0.280581	0.426	0.23	6.80362e-06
2019-09-09	3.21232e-10	0.251949	0.464	0.269	6.89847e-06
Stat6	3.31424e-10	0.314071	0.464	0.248	7.11733e-06
Ubr4	3.57807e-10	0.324157	0.459	0.265	7.68391e-06
Ep300	3.70895e-10	0.286405	0.437	0.235	7.96497e-06
Phyh	5.20283e-10	0.442054	0.311	0.149	1.11731e-05
Agpat2	5.36835e-10	0.307513	0.377	0.195	1.15285e-05
Rcbtb1	6.54478e-10	0.315647	0.317	0.151	1.40549e-05
Mxra8	6.70438e-10	0.498464	0.383	0.21	1.43977e-05
Camk1	9.15894e-10	0.450594	0.563	0.351	1.96688e-05
Snrk	9.50973e-10	0.290435	0.951	0.777	2.04221e-05
Herc2	1.13757e-09	0.348552	0.519	0.32	2.44292e-05
Ldhb	1.25048e-09	0.425457	0.355	0.19	2.6854e-05
Ppp2r5e	1.63369e-09	0.292474	0.344	0.174	3.50834e-05
Ecm1	1.69085e-09	0.409902	0.623	0.392	3.6311e-05
Slco3a1	1.6987e-09	0.358413	0.355	0.182	3.64795e-05
Fam176b	1.85382e-09	0.253302	0.568	0.362	3.98107e-05
Ostc	2.20136e-09	0.300577	0.568	0.364	4.72741e-05
Plxna2	2.21325e-09	0.26728	0.574	0.373	4.75296e-05
Ndfip1	2.26434e-09	0.381922	0.776	0.637	4.86266e-05
Ltbr	3.87286e-09	0.312114	0.514	0.326	8.31696e-05
9530082P21Rik	3.96747e-09	0.366666	0.404	0.227	8.52014e-05
Acadsb	4.06991e-09	0.288452	0.306	0.152	8.74013e-05
Numa1	4.09162e-09	0.258511	0.503	0.3	8.78676e-05
Zcchc14	5.20898e-09	0.254974	0.443	0.248	0.000111863
Prrc2b	5.83068e-09	0.368092	0.541	0.355	0.000125214
Ralb	6.03571e-09	0.319111	0.694	0.483	0.000129617
Atp1b3	6.42919e-09	0.278032	0.918	0.691	0.000138067
Ncoa2	7.4751e-09	0.290201	0.257	0.116	0.000160528
Cd82	8.03038e-09	0.297845	0.339	0.183	0.000172452
Helz	8.98917e-09	0.257537	0.333	0.168	0.000193042
Arid1a	1.83398e-08	0.255521	0.579	0.379	0.000393847
Khk	2.35508e-08	0.261923	0.251	0.115	0.000505753
Huwe1	2.57458e-08	0.253626	0.497	0.304	0.00055289
Zcchc24	2.84706e-08	0.259059	0.317	0.164	0.000611405
Spry4	2.91542e-08	0.262067	0.448	0.267	0.000626086
Creld2	3.15667e-08	0.52163	0.415	0.261	0.000677895
Prex2	3.63827e-08	0.251939	0.776	0.591	0.000781318
2610507B11Rik	3.76833e-08	0.259297	0.383	0.212	0.000809248
Magt1	3.83531e-08	0.358307	0.454	0.284	0.000823634
Tbxa2r	4.27873e-08	0.373229	0.306	0.153	0.000918857
Tbc1d1	4.7812e-08	0.323848	0.273	0.135	0.00102676
Rbm33	5.14009e-08	0.283188	0.279	0.138	0.00110383
Ripk1	6.1442e-08	0.309628	0.415	0.247	0.00131947
Iah1	7.03992e-08	0.269717	0.317	0.168	0.00151182
2400001E08Rik	8.46289e-08	0.272501	0.514	0.341	0.00181741
Grlf1	8.508e-08	0.351362	0.257	0.127	0.00182709
Tpst2	8.9314e-08	0.330749	0.672	0.477	0.00191802
Slc31a2	9.74136e-08	0.275673	0.47	0.28	0.00209196
Dpysl3	1.09212e-07	0.320601	0.301	0.156	0.00234532
Gng12	1.23769e-07	0.282545	0.503	0.324	0.00265794
Mapk12	1.45334e-07	0.316362	0.415	0.252	0.00312104
Ypel2	1.89782e-07	0.287481	0.328	0.179	0.00407557
Lrp10	2.15593e-07	0.251219	0.607	0.424	0.00462986
Baz2a	2.45256e-07	0.298682	0.388	0.224	0.00526686
Rab7l1	3.06674e-07	0.341202	0.295	0.155	0.00658582
Grina	3.40415e-07	0.408267	0.508	0.343	0.00731042
Ddah2	4.25481e-07	0.256723	0.557	0.383	0.0091372
Wdr26	7.20104e-07	0.305987	0.486	0.329	0.0154642
Rpa1	7.25055e-07	0.25647	0.295	0.162	0.0155705
Pik3r1	7.35793e-07	0.315498	0.366	0.219	0.0158012
Tmem55b	1.11135e-06	0.273294	0.432	0.269	0.0238661
Idh1	1.24184e-06	0.357423	0.355	0.212	0.0266686
Tmem179b	1.78082e-06	0.346668	0.393	0.25	0.038243
Ubr5	2.1774e-06	0.279895	0.383	0.234	0.0467597
Tmem205	2.36515e-06	0.314248	0.437	0.302	0.0507916
Ttc4	5.85476e-06	0.295187	0.251	0.134	0.125731
AI837181	6.78861e-06	0.260876	0.322	0.195	0.145785
She	8.39847e-06	0.257151	0.492	0.33	0.180357
Unc93b1	8.67882e-06	0.278067	0.459	0.315	0.186378
Slc38a10	8.99859e-06	0.293786	0.415	0.272	0.193245
D19Wsu162e	9.00629e-06	0.411275	0.317	0.194	0.19341
Irak4	1.02335e-05	0.261485	0.273	0.153	0.219764
Gstp1	1.11537e-05	0.480391	0.721	0.616	0.239526
Jak2	1.47057e-05	0.291631	0.29	0.178	0.315805
Pcbp1	1.67612e-05	0.255432	0.863	0.731	0.359947
Trappc5	1.76506e-05	0.256873	0.355	0.228	0.379047
Plekhf2	2.51997e-05	0.308963	0.344	0.219	0.541163
Lman1	2.82208e-05	0.258778	0.525	0.389	0.606041
Ctnnd1	3.38745e-05	0.284111	0.574	0.417	0.727455
Zfx	4.45585e-05	0.258344	0.251	0.144	0.956894
Cat	5.75258e-05	0.296232	0.497	0.357	1
Phf3	5.96816e-05	0.2666	0.333	0.217	1
Laptm5	6.53432e-05	0.28487	0.377	0.266	1
Atp6ap2	7.94492e-05	0.275439	0.492	0.369	1
Scp2	0.000100788	0.32023	0.661	0.525	1
Pigk	0.000171768	0.355413	0.279	0.175	1
Aff4	0.000186492	0.432895	0.459	0.347	1
Ranbp2	0.000189221	0.2633	0.333	0.227	1
Agpat6	0.000202015	0.355505	0.311	0.21	1
Arhgef15	0.000332865	0.295543	0.612	0.512	1
Pik3ca	0.00111981	0.290608	0.311	0.222	1
Hn1	0.00344094	0.257416	0.432	0.355	1
Sephs2	0.0107397	0.292336	0.279	0.208	1
Dcn	0.0573136	0.332027	0.601	0.598	1

## Sheet: Lung
	p_val	avg_logFC	pct.1	pct.2	p_val_adj
Tmem100	0	3.01506	0.801	0.123	0
Hpgd	0	2.88214	0.802	0.088	0
Lyve1	0	2.04789	0.663	0.08	0
Foxf1a	0	1.87448	0.737	0.069	0
Ace	0	1.53636	0.768	0.151	0
Scn7a	0	1.43081	0.526	0.027	0
1110050K14Rik	0	1.13099	0.507	0.028	0
Grtp1	0	0.946934	0.424	0.009	0
Adrb1	0	0.853046	0.486	0.008	0
Rasgef1a	0	0.811017	0.456	0.016	0
Calcrl	8.68297e-271	2.08367	0.927	0.586	1.86467e-266
Hilpda	1.35394e-267	2.35898	0.671	0.141	2.90759e-263
Tspan8	2.28357e-261	1.54183	0.475	0.04	4.90396e-257
Mfap2	7.98994e-243	1.67116	0.517	0.065	1.71584e-238
Myzap	1.00971e-216	1.36088	0.726	0.198	2.16834e-212
Slco2a1	1.41303e-214	1.52359	0.586	0.108	3.03448e-210
Krt80	2.78904e-209	0.560392	0.324	0.012	5.98945e-205
Ehd4	1.43764e-206	1.46259	0.847	0.381	3.08734e-202
Abi3bp	1.96111e-201	1.02409	0.448	0.056	4.21149e-197
Mapt	5.46073e-198	1.04992	0.453	0.061	1.17269e-193
Prx	1.97577e-196	0.946964	0.327	0.018	4.24296e-192
Casc4	9.08897e-193	0.716783	0.397	0.041	1.95186e-188
Ramp2	9.40133e-190	1.32658	0.934	0.834	2.01894e-185
Adrb2	1.04149e-174	1.46458	0.649	0.194	2.2366e-170
Nckap5	7.53922e-173	0.651494	0.271	0.011	1.61905e-168
Timp2	8.74472e-172	1.30476	0.7	0.238	1.87793e-167
Cdk14	2.44031e-171	0.380799	0.501	0.09	5.24056e-167
Atp2a3	8.89477e-170	1.09816	0.555	0.125	1.91015e-165
Cd9	3.55566e-166	1.1561	0.936	0.662	7.63578e-162
Hopx	5.15361e-166	0.573699	0.315	0.025	1.10674e-161
Nsg1	1.1542e-164	1.05912	0.522	0.113	2.47864e-160
Meis1	1.61292e-160	0.843498	0.39	0.053	3.46374e-156
Sox11	1.09993e-153	0.717111	0.262	0.014	2.36209e-149
Plvap	6.92216e-153	1.14306	0.76	0.275	1.48653e-148
Icam2	9.24922e-148	1.28111	0.892	0.744	1.98627e-143
BC028528	4.82145e-146	1.53008	0.757	0.412	1.03541e-141
Tmcc2	1.07319e-145	1.2596	0.537	0.143	2.30468e-141
Ccbp2	1.12613e-143	1.01884	0.327	0.037	2.41837e-139
Vegfa	2.37258e-143	0.282556	0.327	0.037	5.09511e-139
Clec14a	2.45685e-141	1.47995	0.815	0.465	5.27609e-137
Acvrl1	1.21862e-140	1.32216	0.853	0.588	2.617e-136
Dpysl2	2.13726e-136	1.28505	0.942	0.869	4.58977e-132
Cd97	3.18279e-133	1.42971	0.841	0.486	6.83504e-129
Thbd	3.02366e-132	1.37661	0.878	0.745	6.49331e-128
Tmem176a	1.05111e-129	1.30064	0.668	0.272	2.25725e-125
Ppp1r16b	6.73536e-124	1.40566	0.878	0.662	1.44642e-119
Itm2b	7.57053e-122	0.672103	0.987	0.993	1.62577e-117
Cyp4b1	2.0957e-121	1.41574	0.834	0.495	4.50052e-117
Stmn2	4.75381e-121	0.964604	0.596	0.193	1.02088e-116
Nkd1	8.85044e-121	0.967076	0.527	0.157	1.90063e-116
Tspan7	8.90442e-121	1.20859	0.857	0.662	1.91222e-116
Prickle2	1.29228e-120	0.920275	0.429	0.1	2.77517e-116
Fmo1	3.08062e-114	1.07501	0.83	0.459	6.61563e-110
Sema3c	1.19411e-113	1.20896	0.552	0.172	2.56434e-109
Kit	2.7155e-113	0.81906	0.397	0.085	5.83153e-109
C920021L13Rik	3.18917e-113	0.366573	0.538	0.168	6.84874e-109
Pard6g	3.70222e-113	0.71465	0.328	0.054	7.95052e-109
H2-D1	2.0184e-112	0.64102	0.992	0.991	4.33451e-108
Ncald	4.73345e-111	0.709741	0.292	0.042	1.01651e-106
Cldn5	9.84025e-108	0.765017	0.923	0.681	2.11319e-103
Pde9a	3.02957e-104	0.714863	0.286	0.043	6.50601e-100
Tmem176b	7.36972e-101	1.15621	0.768	0.459	1.58265e-96
Clec1a	2.92436e-100	1.15893	0.665	0.324	6.28007e-96
Tcn2	1.49875e-96	0.932235	0.843	0.576	3.21857e-92
Pde3a	1.92816e-93	0.44719	0.254	0.038	4.14073e-89
Igfbp4	8.89029e-93	0.886962	0.701	0.336	1.90919e-88
Casz1	1.80505e-91	0.480304	0.493	0.164	3.87635e-87
Pam	2.77557e-91	0.691256	0.862	0.567	5.96053e-87
H2-Ab1	4.32548e-91	2.19137	0.61	0.326	9.28897e-87
Fam38b	1.53774e-88	0.459489	0.303	0.059	3.3023e-84
H2-Aa	4.57634e-88	1.94982	0.552	0.269	9.82769e-84
Cd74	8.06619e-86	1.70539	0.606	0.326	1.73221e-81
Ankrd33b	1.02391e-85	0.671358	0.406	0.118	2.19884e-81
Slc16a9	1.03444e-82	0.601441	0.333	0.081	2.22146e-78
Aldh2	2.3372e-82	0.875507	0.831	0.598	5.01915e-78
Tspan18	9.97538e-82	0.972245	0.659	0.346	2.14221e-77
Hyal2	2.15251e-81	0.929604	0.689	0.389	4.62251e-77
Pde4b	1.02132e-80	0.780668	0.752	0.423	2.19328e-76
Ripply3	1.10585e-80	1.13632	0.503	0.208	2.37482e-76
Ecscr	1.43753e-80	0.900091	0.81	0.592	3.08709e-76
Tmod2	4.22726e-80	0.627914	0.307	0.073	9.07803e-76
Ldb2	1.55767e-79	0.73351	0.675	0.319	3.34509e-75
Ghr	1.04119e-78	0.70523	0.457	0.166	2.23596e-74
Foxp1	1.11062e-78	0.840431	0.859	0.625	2.38507e-74
Cadm1	1.11684e-77	0.780274	0.359	0.103	2.39841e-73
Hs3st1	1.35258e-77	1.05695	0.413	0.141	2.90467e-73
H2-K1	2.38059e-77	0.671557	0.973	0.966	5.11231e-73
6330512M04Rik	2.4947e-77	0.771655	0.284	0.064	5.35738e-73
Gja4	5.91069e-77	1.21575	0.446	0.161	1.26932e-72
Tmem2	8.00115e-77	0.725192	0.699	0.367	1.71825e-72
Atp13a2	3.42122e-76	0.606748	0.34	0.09	7.34707e-72
Smad6	1.43127e-75	0.557172	0.582	0.25	3.07365e-71
5430417L22Rik	3.40785e-75	1.01461	0.506	0.215	7.31837e-71
Lysmd2	8.25119e-75	0.852184	0.542	0.246	1.77194e-70
Gata3	7.66879e-74	0.830908	0.339	0.099	1.64687e-69
Pllp	1.05771e-72	0.661091	0.541	0.221	2.27142e-68
Gmfg	2.44553e-71	0.39555	0.287	0.07	5.25179e-67
Egfl7	3.15813e-70	0.694153	0.923	0.902	6.78207e-66
Nhlrc2	3.32703e-70	0.843815	0.317	0.091	7.14479e-66
H2-Q6	8.73712e-70	0.838869	0.627	0.318	1.8763e-65
Ptgfrn	1.14377e-69	0.283342	0.29	0.07	2.45626e-65
Ece1	1.86313e-69	0.854946	0.914	0.845	4.00107e-65
Phlda3	1.51586e-68	0.840854	0.385	0.132	3.25532e-64
Lhfp	1.03636e-67	0.832079	0.371	0.127	2.22558e-63
Hoxa5	3.06037e-67	0.650265	0.299	0.081	6.57215e-63
Pdlim2	8.36301e-67	0.66834	0.311	0.091	1.79596e-62
Pltp	9.03197e-67	0.674036	0.815	0.572	1.93961e-62
Ddah1	6.49137e-65	0.788653	0.422	0.157	1.39402e-60
Cd24a	2.48757e-64	0.394864	0.505	0.209	5.34205e-60
Cyth3	3.90986e-64	0.765187	0.602	0.309	8.39642e-60
Arglu1	4.09503e-64	0.847438	0.927	0.856	8.79409e-60
Stmn1	1.20328e-63	0.768374	0.57	0.307	2.58404e-59
Sema3f	2.09217e-62	0.601731	0.519	0.232	4.49293e-58
Cebpd	4.58669e-61	0.988361	0.736	0.528	9.84992e-57
Fkbp1a	1.20482e-60	0.615524	0.923	0.868	2.58734e-56
Rnf144a	2.01401e-60	0.67429	0.588	0.297	4.3251e-56
H2-Eb1	1.35027e-59	1.40732	0.426	0.196	2.89969e-55
Crip2	1.84716e-59	0.690339	0.928	0.913	3.96678e-55
Clu	9.53903e-57	0.894405	0.582	0.313	2.04851e-52
Plec	1.85045e-56	0.883363	0.784	0.591	3.97384e-52
Galntl4	3.38064e-56	0.605392	0.602	0.305	7.25993e-52
Agpat4	5.0633e-56	0.785895	0.429	0.186	1.08734e-51
Rnf141	8.39493e-56	0.387269	0.373	0.141	1.80281e-51
Hmcn1	1.24443e-55	0.450175	0.535	0.271	2.67242e-51
Lphn1	3.18644e-55	0.319084	0.263	0.072	6.84287e-51
Pak4	2.26472e-54	0.412978	0.274	0.079	4.86348e-50
Slc43a3	1.03316e-53	0.603805	0.841	0.591	2.21871e-49
Ccrl2	4.94979e-53	0.830034	0.408	0.174	1.06297e-48
Efnb2	6.31284e-51	0.872798	0.643	0.424	1.35568e-46
Acer3	1.73309e-50	0.508636	0.34	0.126	3.72182e-46
Cd47	5.42919e-50	0.547971	0.891	0.717	1.16592e-45
Qsox1	6.30444e-50	0.700041	0.596	0.351	1.35388e-45
Fam108c	9.42008e-50	0.452237	0.356	0.138	2.02296e-45
Vim	1.43309e-49	0.545233	0.896	0.782	3.07756e-45
Ntn1	3.27796e-49	0.389272	0.291	0.096	7.03943e-45
Ppap2a	4.13448e-49	0.482934	0.826	0.636	8.8788e-45
Lamp1	4.86613e-49	0.538969	0.944	0.864	1.045e-44
Arrb1	2.10574e-48	0.400163	0.313	0.109	4.52209e-44
Il2rg	2.29332e-47	0.722101	0.633	0.402	4.9249e-43
Elovl1	6.02064e-47	0.780915	0.604	0.372	1.29293e-42
Ahr	4.71885e-46	0.361812	0.351	0.137	1.01337e-41
D4Bwg0951e	5.73151e-46	0.573082	0.297	0.105	1.23084e-41
Gm13889	2.57922e-45	0.271626	0.292	0.101	5.53887e-41
Plscr1	4.23858e-45	0.58297	0.522	0.28	9.10235e-41
Plaur	4.46757e-44	0.270588	0.521	0.265	9.5941e-40
Gltp	5.17427e-44	0.710508	0.555	0.332	1.11118e-39
Shisa5	1.66529e-43	0.561407	0.842	0.755	3.57621e-39
Car2	5.97219e-43	0.990969	0.392	0.183	1.28253e-38
Pmp22	7.10741e-43	1.18202	0.623	0.453	1.52632e-38
Ankrd44	1.00314e-42	0.421277	0.368	0.159	2.15424e-38
Dpp4	1.65578e-42	0.324416	0.324	0.12	3.55579e-38
Lbp	2.13024e-42	0.838858	0.288	0.106	4.57468e-38
Klhl5	1.28825e-41	0.70784	0.566	0.332	2.76651e-37
Gnaq	1.5621e-41	0.570584	0.738	0.527	3.35461e-37
Atp2b1	2.04753e-41	0.663656	0.684	0.479	4.39708e-37
Gcg	2.39403e-41	1.08946	0.4	0.171	5.14119e-37
Gstm1	3.62101e-41	0.73257	0.833	0.789	7.77611e-37
Acer2	5.17066e-41	0.801815	0.586	0.369	1.1104e-36
Pitpnc1	5.61759e-41	0.669937	0.829	0.739	1.20638e-36
P2rx4	6.37431e-41	0.63114	0.331	0.138	1.36888e-36
Lxn	3.24733e-40	0.704788	0.428	0.218	6.97365e-36
H2-T23	1.11564e-39	0.553711	0.861	0.748	2.39583e-35
Eln	4.0778e-39	0.438604	0.303	0.12	8.75707e-35
Cish	7.19851e-39	0.55183	0.389	0.181	1.54588e-34
Trim8	7.8389e-39	0.379034	0.564	0.329	1.6834e-34
Adk	1.03204e-38	0.505902	0.335	0.145	2.21631e-34
S100a16	1.39184e-38	0.587299	0.849	0.758	2.98898e-34
Malat1	1.85165e-38	0.430488	0.999	0.997	3.97643e-34
St5	2.46019e-38	0.277171	0.389	0.177	5.28326e-34
Stxbp6	1.08492e-37	0.414007	0.347	0.151	2.32987e-33
Kdelr2	3.25267e-37	0.614064	0.841	0.71	6.98511e-33
Fgfr3	4.2408e-37	0.427672	0.301	0.122	9.10712e-33
Pan3	7.87949e-37	0.597168	0.752	0.592	1.69212e-32
Ctla2a	8.32494e-37	0.655443	0.801	0.702	1.78778e-32
Edn1	1.47327e-36	0.688404	0.36	0.166	3.16384e-32
Tubb5	1.98771e-36	0.684408	0.886	0.833	4.2686e-32
Marveld1	2.67409e-36	0.399467	0.296	0.117	5.74261e-32
S1pr4	3.25769e-36	0.572191	0.301	0.128	6.99588e-32
Ddah2	4.18475e-36	0.699061	0.544	0.357	8.98676e-32
Prss23	6.34207e-36	1.49119	0.434	0.245	1.36196e-31
Plscr3	6.69085e-36	0.342384	0.522	0.293	1.43686e-31
B2m	6.80619e-36	0.305197	0.983	0.994	1.46163e-31
Zfp187	9.01884e-36	0.688816	0.784	0.647	1.9368e-31
Rab27a	1.70693e-35	0.469529	0.266	0.103	3.66563e-31
Cdr2l	6.51182e-34	0.792288	0.332	0.156	1.39841e-29
Laptm4a	4.44417e-33	0.324419	0.954	0.95	9.54385e-29
Slc3a2	8.91664e-33	0.455844	0.822	0.642	1.91485e-28
Sppl3	1.59604e-32	0.509695	0.513	0.318	3.4275e-28
Arl4d	4.42013e-32	0.736895	0.446	0.269	9.49223e-28
1810006K21Rik	1.27539e-31	0.332111	0.575	0.392	2.7389e-27
Ly6a	1.28726e-31	0.477035	0.882	0.915	2.76439e-27
Ctsd	2.38665e-31	0.484656	0.91	0.846	5.12533e-27
Gstp1	7.78399e-31	0.567514	0.714	0.6	1.67161e-26
Impdh1	1.35209e-30	0.602445	0.588	0.397	2.90362e-26
Aph1a	1.55711e-30	0.392105	0.611	0.415	3.34388e-26
Cyb561	2.58287e-30	0.330381	0.386	0.188	5.5467e-26
Bin1	2.61965e-30	0.442548	0.305	0.147	5.6257e-26
Tgfb1i1	8.68883e-30	0.536116	0.503	0.317	1.86593e-25
Kdsr	1.27622e-29	0.485997	0.47	0.281	2.74068e-25
Emp2	2.15366e-29	1.74922	0.43	0.278	4.62499e-25
6430548M08Rik	2.99286e-29	0.387942	0.283	0.123	6.42716e-25
B4galt1	5.9029e-29	0.82258	0.669	0.543	1.26765e-24
Ptprk	6.22268e-29	0.305759	0.357	0.177	1.33632e-24
Rbm26	8.06647e-29	0.349772	0.555	0.377	1.73227e-24
Epas1	1.39402e-28	0.561879	0.884	0.894	2.99365e-24
Bmp6	1.82757e-28	0.619024	0.412	0.222	3.9247e-24
Skap2	3.45199e-28	0.601113	0.388	0.219	7.41315e-24
Wtap	3.8214e-28	0.694667	0.724	0.602	8.20645e-24
Gata2	2.51673e-27	0.44158	0.653	0.459	5.40468e-23
Serpinb1a	4.40548e-27	0.678276	0.293	0.144	9.46076e-23
Tmem50a	4.64987e-27	0.453518	0.819	0.746	9.98559e-23
Avpi1	4.82556e-27	0.721875	0.259	0.119	1.03629e-22
Tbx3	7.3223e-27	0.5818	0.474	0.295	1.57246e-22
Wscd1	2.99249e-26	0.319255	0.343	0.169	6.42638e-22
Gcc2	8.24809e-26	0.290319	0.41	0.235	1.77128e-21
Plekha2	9.13206e-26	0.362864	0.339	0.171	1.96111e-21
Tspo	1.31686e-25	0.578463	0.765	0.681	2.82796e-21
Snx21	1.36773e-25	0.42995	0.259	0.119	2.9372e-21
Vwf	1.70299e-25	1.12083	0.371	0.214	3.65716e-21
Daam1	1.93364e-25	0.258976	0.324	0.163	4.15249e-21
Lcp1	4.10837e-25	0.309961	0.267	0.124	8.82273e-21
Gnb1	5.90291e-25	0.59124	0.977	0.974	1.26765e-20
Snrpb	7.63689e-25	0.62458	0.777	0.717	1.64002e-20
Tmbim1	1.04879e-24	0.456881	0.631	0.466	2.25228e-20
Ly6e	1.47223e-24	0.395791	0.968	0.966	3.16161e-20
Prickle1	1.58935e-24	0.472158	0.475	0.313	3.41313e-20
Tnfsf10	2.7057e-24	0.482981	0.502	0.336	5.81049e-20
Clec2d	3.28262e-24	0.36255	0.681	0.541	7.04943e-20
4930420K17Rik	9.86768e-24	0.326248	0.343	0.19	2.11908e-19
Mcam	1.62238e-23	0.46452	0.489	0.286	3.48406e-19
Myl12b	1.66098e-23	0.40398	0.912	0.879	3.56696e-19
Trim16	1.71372e-23	0.399206	0.319	0.166	3.68022e-19
Slco3a1	5.11122e-23	0.363496	0.316	0.162	1.09764e-18
Tmem63a	1.06339e-22	0.355022	0.291	0.146	2.28362e-18
Phactr1	1.13194e-22	0.350624	0.286	0.142	2.43085e-18
Rhoj	1.41151e-22	0.360544	0.722	0.566	3.03122e-18
Wfdc1	1.86964e-22	0.423913	0.394	0.215	4.01506e-18
Klf13	2.78751e-22	0.633514	0.884	0.886	5.98618e-18
Txn1	3.46673e-22	0.457359	0.769	0.715	7.44481e-18
Myct1	1.09168e-21	0.347101	0.716	0.581	2.34439e-17
Rcsd1	1.21877e-21	0.288307	0.465	0.282	2.61731e-17
Txndc5	1.33711e-21	0.283429	0.438	0.264	2.87143e-17
Tmco1	2.02137e-21	0.515024	0.624	0.513	4.3409e-17
Nostrin	2.72647e-21	0.45988	0.543	0.391	5.8551e-17
Slc39a1	3.37228e-21	0.606301	0.849	0.768	7.24198e-17
Map1lc3a	4.13709e-21	0.509207	0.578	0.458	8.88439e-17
Notch2	4.79452e-21	0.325085	0.317	0.181	1.02962e-16
Fas	4.89922e-21	0.393002	0.604	0.445	1.05211e-16
Rps6ka1	1.18905e-20	0.320115	0.312	0.169	2.55348e-16
Smarca2	2.66761e-20	0.425532	0.627	0.456	5.72869e-16
Ctsc	3.04038e-20	0.514704	0.295	0.164	6.52922e-16
Itpripl2	3.71706e-20	0.252159	0.384	0.234	7.98238e-16
Mkl2	4.05149e-20	0.67196	0.627	0.518	8.70058e-16
Tspan9	4.88257e-20	0.478404	0.639	0.497	1.04853e-15
Cd93	5.01143e-20	0.75354	0.76	0.838	1.0762e-15
Mll2	5.27603e-20	0.326506	0.773	0.671	1.13303e-15
Gpx3	5.58887e-20	0.614862	0.449	0.314	1.20021e-15
Grn	6.85621e-20	0.45935	0.772	0.669	1.47237e-15
Tppp3	1.79146e-19	0.676618	0.429	0.286	3.84717e-15
Dad1	3.03942e-19	0.394827	0.744	0.649	6.52715e-15
Tmem59	3.2813e-19	0.290805	0.886	0.855	7.04659e-15
Clic1	5.19929e-19	0.393342	0.821	0.766	1.11655e-14
Atxn10	2.55979e-18	0.43705	0.418	0.277	5.49715e-14
Fhl1	2.57763e-18	0.327739	0.392	0.243	5.53546e-14
Carhsp1	7.1206e-18	0.250006	0.491	0.32	1.52915e-13
Alkbh5	7.42859e-18	0.422622	0.745	0.649	1.59529e-13
4921513D23Rik	9.32679e-18	0.616685	0.722	0.632	2.00293e-13
Tmbim4	1.13746e-17	0.507105	0.55	0.427	2.4427e-13
Cbfa2t3	1.28625e-17	0.322945	0.701	0.565	2.76223e-13
1810063B07Rik	3.34688e-17	0.449847	0.313	0.188	7.18742e-13
Hmgn2	6.24949e-17	0.383729	0.481	0.355	1.34208e-12
Bmpr2	1.021e-16	0.422817	0.352	0.221	2.19261e-12
Sdc4	1.04122e-16	0.69125	0.489	0.387	2.23603e-12
Ifitm2	1.05865e-16	0.3664	0.951	0.937	2.27345e-12
Spry2	1.17355e-16	0.410961	0.463	0.353	2.52021e-12
Lyz2	1.77656e-16	1.93635	0.541	0.377	3.81517e-12
Sgce	3.45452e-16	0.379275	0.313	0.189	7.41858e-12
Asap2	3.95018e-16	0.250153	0.398	0.263	8.483e-12
Ifi47	5.21335e-16	0.472775	0.353	0.224	1.11957e-11
Npdc1	6.28405e-16	0.419124	0.552	0.418	1.3495e-11
Pfn1	7.23455e-16	0.368916	0.9	0.899	1.55362e-11
Slc9a3r2	1.2512e-15	0.323411	0.899	0.897	2.68696e-11
Il4ra	1.38825e-15	0.332931	0.424	0.269	2.98127e-11
Ubl7	1.45828e-15	0.308341	0.375	0.249	3.13165e-11
Lgmn	1.99785e-15	0.26008	0.513	0.389	4.29038e-11
Ap2a2	2.53112e-15	0.374968	0.628	0.519	5.43559e-11
Agtrap	2.62373e-15	0.393299	0.328	0.206	5.63446e-11
Sat1	4.00022e-15	0.486506	0.728	0.65	8.59047e-11
Sod1	6.89798e-15	0.581572	0.938	0.937	1.48134e-10
Rap1a	9.11046e-15	0.304434	0.627	0.509	1.95647e-10
Hpcal1	9.82753e-15	0.434071	0.542	0.437	2.11046e-10
Guk1	1.25624e-14	0.532134	0.385	0.273	2.69778e-10
Lass4	1.32448e-14	0.373748	0.402	0.273	2.84433e-10
Ssr1	1.37733e-14	0.401762	0.712	0.664	2.95782e-10
Degs1	1.57473e-14	0.252808	0.664	0.513	3.38174e-10
Mtmr2	1.78076e-14	0.317375	0.606	0.501	3.82419e-10
Fam108b	2.29226e-14	0.274058	0.317	0.201	4.92262e-10
Hey1	2.58661e-14	0.341681	0.352	0.224	5.55476e-10
Stt3b	3.21791e-14	0.49864	0.331	0.214	6.91047e-10
Marcks	4.49384e-14	0.373399	0.736	0.658	9.65052e-10
Pcdh17	4.8921e-14	0.281051	0.424	0.289	1.05058e-09
Atp1b3	7.77525e-14	0.289547	0.786	0.682	1.66974e-09
Tmem109	7.82704e-14	0.348923	0.657	0.561	1.68086e-09
Efcab4a	9.60575e-14	0.353314	0.572	0.461	2.06284e-09
Lrg1	9.6973e-14	0.287514	0.251	0.141	2.0825e-09
Abi3	1.16679e-13	0.333717	0.458	0.339	2.50568e-09
Lrrc8a	1.16758e-13	0.661593	0.867	0.87	2.50737e-09
Mid1ip1	1.2624e-13	0.336542	0.299	0.188	2.711e-09
Acot2	2.08128e-13	0.471494	0.284	0.181	4.46956e-09
Klf4	2.30891e-13	0.265265	0.825	0.728	4.95838e-09
Dnajc8	2.66858e-13	0.407683	0.615	0.53	5.73077e-09
Tuba1a	5.86162e-13	0.284125	0.839	0.789	1.25878e-08
Arap2	8.8072e-13	0.29567	0.325	0.212	1.89135e-08
Inpp5k	1.52783e-12	0.320615	0.414	0.287	3.28102e-08
Srsf5	1.89578e-12	0.260317	0.784	0.703	4.0712e-08
Ncoa3	1.98184e-12	0.468844	0.709	0.651	4.256e-08
Sec11a	2.09637e-12	0.429629	0.469	0.365	4.50195e-08
Cmtm3	2.19941e-12	0.418948	0.41	0.298	4.72324e-08
Rpn1	2.43762e-12	0.338981	0.644	0.535	5.23479e-08
Spcs1	3.79542e-12	0.420872	0.604	0.542	8.15067e-08
Fam173a	4.12815e-12	0.300345	0.258	0.159	8.86521e-08
Cyb5	4.93519e-12	0.346484	0.718	0.663	1.05983e-07
Dctn4	8.62913e-12	0.354957	0.57	0.502	1.8531e-07
Dhrs1	8.87592e-12	0.473366	0.271	0.173	1.9061e-07
Mapk3	1.11872e-11	0.253657	0.697	0.589	2.40246e-07
Klhl9	1.15612e-11	0.369154	0.556	0.459	2.48278e-07
Rnf187	1.825e-11	0.287583	0.628	0.536	3.91919e-07
Atpif1	1.9894e-11	0.291939	0.542	0.441	4.27223e-07
H47	2.25165e-11	0.322563	0.313	0.212	4.83541e-07
Mcmbp	3.27718e-11	0.304113	0.611	0.514	7.03774e-07
Mrps18a	4.94749e-11	0.299647	0.312	0.217	1.06247e-06
Grap	6.39477e-11	0.454307	0.509	0.414	1.37328e-06
Tmem126a	8.03676e-11	0.323601	0.394	0.299	1.72589e-06
Ephx1	8.88732e-11	0.261133	0.578	0.466	1.90855e-06
Ifitm3	1.07295e-10	0.341473	0.95	0.973	2.30417e-06
Ppp1ca	1.07334e-10	0.355579	0.748	0.732	2.305e-06
Ict1	1.07895e-10	0.365216	0.29	0.196	2.31705e-06
Atp6v0b	1.08122e-10	0.344338	0.611	0.533	2.32193e-06
Elovl5	1.13774e-10	0.303038	0.623	0.504	2.4433e-06
Abhd16a	1.54921e-10	0.339578	0.466	0.366	3.32693e-06
Mxra8	1.62743e-10	0.531841	0.291	0.201	3.4949e-06
Slc31a2	3.37793e-10	0.369816	0.372	0.27	7.2541e-06
Clk1	3.55987e-10	0.263698	0.631	0.513	7.64483e-06
Acap2	5.2345e-10	0.252023	0.428	0.319	1.12411e-05
Pcbp1	5.67998e-10	0.307234	0.788	0.726	1.21978e-05
Smpdl3a	6.71021e-10	0.352298	0.571	0.477	1.44102e-05
Spcs2	7.85483e-10	0.272271	0.604	0.52	1.68682e-05
D17H6S53E	8.03679e-10	0.291082	0.288	0.201	1.7259e-05
Gsk3b	8.37334e-10	0.321522	0.768	0.708	1.79818e-05
Mxra7	1.02403e-09	0.348251	0.42	0.321	2.1991e-05
Tmed4	1.16355e-09	0.318452	0.438	0.34	2.49872e-05
Inpp4a	1.20774e-09	0.421162	0.453	0.369	2.59361e-05
Ecm1	1.29183e-09	0.307628	0.482	0.385	2.7742e-05
Syngr2	1.34479e-09	0.452406	0.501	0.425	2.88795e-05
Anxa2	1.73542e-09	0.33941	0.843	0.826	3.72682e-05
4632428N05Rik	1.766e-09	0.27694	0.41	0.304	3.79248e-05
Ppib	1.9359e-09	0.259717	0.721	0.696	4.15735e-05
Dapk3	2.02646e-09	0.302992	0.27	0.182	4.35182e-05
Dpagt1	2.32862e-09	0.290846	0.323	0.227	5.00072e-05
Vamp8	2.3764e-09	0.333937	0.551	0.48	5.10331e-05
Mgst3	2.39207e-09	0.309698	0.333	0.248	5.13698e-05
Psmb9	2.69098e-09	0.327508	0.518	0.441	5.77887e-05
Commd3	2.73714e-09	0.338472	0.365	0.276	5.878e-05
Limd2	2.73996e-09	0.312988	0.347	0.253	5.88406e-05
Rab31	3.2082e-09	0.350145	0.394	0.299	6.88962e-05
Trib2	3.8841e-09	0.412544	0.409	0.316	8.3411e-05
Gstm2	4.0893e-09	0.422941	0.397	0.312	8.78176e-05
Hfe	4.22104e-09	0.426171	0.315	0.227	9.06468e-05
Ucp2	4.54173e-09	0.362769	0.664	0.594	9.75336e-05
Emp3	4.9791e-09	0.498947	0.264	0.185	0.000106926
Tecr	5.56121e-09	0.394451	0.47	0.385	0.000119427
Smagp	6.07e-09	0.409098	0.485	0.416	0.000130353
Tapbpl	7.8623e-09	0.327272	0.349	0.258	0.000168843
Rgs12	8.00612e-09	0.289203	0.375	0.274	0.000171931
Unc50	1.25013e-08	0.39896	0.41	0.33	0.000268464
Iscu	1.30689e-08	0.301034	0.482	0.4	0.000280656
Zmynd8	1.3404e-08	0.287629	0.388	0.306	0.000287851
Vdac3	1.50361e-08	0.319331	0.546	0.468	0.0003229
Hn1	1.77294e-08	0.430314	0.422	0.344	0.000380739
Tpra1	1.79108e-08	0.368999	0.348	0.261	0.000384634
Dhrs7	1.82464e-08	0.384179	0.429	0.358	0.000391841
Rabac1	1.93307e-08	0.279432	0.801	0.778	0.000415126
Vdac2	2.27832e-08	0.332023	0.554	0.477	0.00048927
Ier2	2.29366e-08	0.339648	0.835	0.786	0.000492564
Pcdh1	2.60351e-08	0.565641	0.402	0.319	0.000559103
Jag1	2.75763e-08	0.364994	0.454	0.391	0.000592201
Leprot	2.80048e-08	0.278825	0.572	0.488	0.000601403
Akr1a1	2.8009e-08	0.254059	0.823	0.806	0.000601493
Rnasek	3.92453e-08	0.322082	0.64	0.579	0.000842793
Cnp	4.13027e-08	0.294716	0.347	0.265	0.000886975
Ssr2	4.69631e-08	0.343197	0.517	0.451	0.00100853
Cnn3	4.85699e-08	0.265642	0.772	0.742	0.00104304
Xbp1	5.0428e-08	0.275537	0.6	0.53	0.00108294
Fam3c	5.36869e-08	0.697513	0.502	0.431	0.00115293
Sdhb	6.02538e-08	0.360784	0.574	0.51	0.00129395
1110007C09Rik	7.23076e-08	0.3806	0.389	0.32	0.00155281
1110038F14Rik	7.73689e-08	0.367217	0.333	0.261	0.0016615
Lass2	1.0051e-07	0.275237	0.506	0.421	0.00215845
Hsd17b12	1.05105e-07	0.341613	0.38	0.297	0.00225713
Ddost	1.20529e-07	0.29267	0.612	0.534	0.00258835
H2-M3	1.28555e-07	0.337267	0.262	0.185	0.00276072
Mrps28	1.32971e-07	0.272222	0.254	0.18	0.00285556
Psma3	2.71204e-07	0.287898	0.671	0.632	0.0058241
Tmem85	2.7288e-07	0.262674	0.389	0.306	0.00586009
Lpcat3	3.0913e-07	0.274288	0.327	0.246	0.00663857
Vps36	3.68603e-07	0.28879	0.352	0.277	0.00791575
Mocs2	3.68784e-07	0.315181	0.313	0.241	0.00791964
Nol7	4.64226e-07	0.284549	0.478	0.416	0.00996925
Tmem208	5.86992e-07	0.321691	0.312	0.234	0.0126056
Cgrrf1	6.74843e-07	0.327608	0.259	0.185	0.0144923
Mrpl4	7.78016e-07	0.278056	0.413	0.348	0.0167079
Prdx2	8.08761e-07	0.358835	0.534	0.484	0.0173681
Ssbp3	9.23773e-07	0.260908	0.299	0.224	0.019838
Twf2	9.39771e-07	0.340596	0.327	0.25	0.0201816
Nenf	1.07056e-06	0.290815	0.39	0.328	0.0229902
Tmem205	1.16039e-06	0.252546	0.369	0.295	0.0249194
Tfg	1.18763e-06	0.269042	0.331	0.255	0.0255044
Acadl	1.20371e-06	0.280751	0.489	0.409	0.0258496
Rbm15	1.34696e-06	0.263513	0.36	0.299	0.0289261
Psmb2	1.50816e-06	0.32606	0.604	0.545	0.0323878
1110008F13Rik	1.59818e-06	0.311376	0.336	0.271	0.034321
Ociad1	1.66525e-06	0.269113	0.591	0.544	0.0357612
Ypel3	1.66855e-06	0.257467	0.558	0.488	0.035832
Tmed9	1.76113e-06	0.268284	0.616	0.563	0.0378203
Abcg1	1.77439e-06	0.445716	0.408	0.343	0.038105
Fuca1	1.77554e-06	0.264219	0.398	0.323	0.0381298
Slc48a1	2.59055e-06	0.289976	0.408	0.336	0.055632
Ppdpf	2.70375e-06	0.273168	0.428	0.37	0.058063
Orai1	3.2592e-06	0.285387	0.308	0.241	0.0699914
Ormdl2	3.31363e-06	0.259992	0.268	0.203	0.0711602
Cops4	3.35634e-06	0.302306	0.345	0.275	0.0720773
Sh3bgrl3	3.37433e-06	0.336605	0.752	0.746	0.0724638
Scamp3	3.56273e-06	0.331384	0.365	0.299	0.0765096
Hsd3b7	4.35945e-06	0.316993	0.328	0.255	0.0936192
0610031J06Rik	4.53789e-06	0.299876	0.534	0.489	0.0974512
Bub3	5.06842e-06	0.283228	0.445	0.383	0.108844
C330006A16Rik	6.46983e-06	0.495473	0.603	0.568	0.13894
Dctn5	6.82127e-06	0.381747	0.372	0.313	0.146487
Car4	6.91886e-06	0.325738	0.393	0.509	0.148583
Atp6v1g1	8.26562e-06	0.258148	0.652	0.611	0.177504
Efna1	8.47652e-06	0.44292	0.459	0.42	0.182033
Gna13	1.13365e-05	0.280742	0.293	0.226	0.243451
Rps27l	1.18342e-05	0.268072	0.623	0.603	0.25414
Dguok	1.26852e-05	0.368308	0.288	0.226	0.272415
0610007C21Rik	1.29329e-05	0.298686	0.525	0.488	0.277735
0610010K14Rik	1.32473e-05	0.348941	0.405	0.359	0.284485
Git2	1.59753e-05	0.258658	0.51	0.426	0.34307
Otub1	1.621e-05	0.302908	0.434	0.373	0.348111
Psmb10	1.63599e-05	0.333904	0.56	0.517	0.351328
Por	1.77915e-05	0.350943	0.378	0.314	0.382073
Tmem206	1.78378e-05	0.252519	0.256	0.196	0.383066
Psma5	1.95687e-05	0.335827	0.475	0.434	0.420239
Comt	2.15177e-05	0.330001	0.519	0.466	0.462092
Psma2	2.50995e-05	0.316235	0.575	0.558	0.539012
Psmb8	2.76347e-05	0.273088	0.676	0.638	0.593455
Nudt16l1	2.78053e-05	0.344452	0.263	0.207	0.597119
H13	2.8631e-05	0.263533	0.482	0.425	0.614851
Atp6v0e	3.26845e-05	0.304302	0.592	0.551	0.7019
Vps25	3.41061e-05	0.251476	0.425	0.362	0.732427
Yif1a	3.61526e-05	0.347904	0.287	0.225	0.776377
Rhog	3.69496e-05	0.296604	0.449	0.391	0.793493
Rnf7	3.72136e-05	0.306611	0.471	0.426	0.799163
Wdr61	5.75196e-05	0.265072	0.319	0.255	1
Gimap1	7.39408e-05	0.325709	0.501	0.447	1
Chmp6	8.88563e-05	0.283677	0.272	0.218	1
C1qbp	0.000108779	0.273219	0.272	0.221	1
Mgp	0.000145994	0.802225	0.459	0.406	1
Cd63	0.000198864	0.411494	0.388	0.338	1
Psme1	0.000224487	0.288206	0.671	0.65	1
Sema6a	0.00023888	0.288493	0.55	0.5	1
Stard3nl	0.000286059	0.296074	0.309	0.259	1
Prdx3	0.000320661	0.255806	0.259	0.207	1
Vcl	0.000325424	0.268676	0.467	0.42	1
Twf1	0.000340382	0.373318	0.548	0.533	1
Tor1b	0.000396668	0.266189	0.299	0.244	1
Vps72	0.000563059	0.251278	0.312	0.261	1
Manf	0.000613283	0.294276	0.485	0.461	1
Psmb1	0.000742035	0.255167	0.663	0.651	1
Nsfl1c	0.00079287	0.283816	0.371	0.325	1
Tax1bp1	0.00101433	0.252535	0.692	0.64	1
Tmed3	0.00131268	0.3024	0.347	0.304	1
Spin1	0.00136507	0.356936	0.375	0.339	1
Fkbp7	0.00139452	0.282613	0.266	0.225	1
Copz1	0.00205906	0.265196	0.388	0.351	1
Prdx6	0.00238297	0.391985	0.402	0.356	1
Dap	0.00244593	0.355637	0.301	0.264	1
Trappc4	0.0024911	0.324996	0.376	0.347	1
Rps4y2	0.00273245	0.281894	0.368	0.332	1
Fis1	0.00278089	0.293458	0.552	0.546	1
Trf	0.00296883	0.503138	0.478	0.44	1
Psmc2	0.002992	0.256203	0.397	0.372	1
Atp5d	0.00322509	0.297703	0.629	0.624	1
Yif1b	0.00337532	0.275013	0.39	0.362	1
Ddhd2	0.00372534	0.286687	0.254	0.211	1
Mrp63	0.00524979	0.257029	0.279	0.244	1
Hsbp1	0.00535205	0.264206	0.575	0.569	1
Golt1b	0.00579156	0.283603	0.27	0.236	1
Psma6	0.00596981	0.251597	0.555	0.543	1
Ctss	0.00597983	0.315364	0.303	0.259	1
Prelid1	0.00678173	0.291646	0.544	0.532	1
Necap2	0.00919345	0.276616	0.325	0.301	1
Fam195b	0.00984556	0.254842	0.373	0.348	1
Laptm5	0.0191093	0.351018	0.3	0.264	1
Atg3	0.0192258	0.251053	0.293	0.266	1
Fxyd5	0.0195963	0.310639	0.608	0.593	1
Ctsh	0.0209178	0.29558	0.305	0.355	1
Tbcb	0.0261375	0.285546	0.39	0.374	1
Gatad1	0.0290309	0.319524	0.47	0.471	1
Dusp3	0.0350491	0.288959	0.875	0.918	1
4933434E20Rik	0.044267	0.321275	0.351	0.331	1
9430023L20Rik	0.0491299	0.258767	0.251	0.228	1
Atp1a1	0.0638807	0.400772	0.594	0.577	1
Erp29	0.124801	0.280009	0.359	0.349	1
Gm2a	0.12934	0.331144	0.373	0.359	1
E030010A14Rik	0.142398	0.270315	0.254	0.236	1
Tek	0.144994	0.352741	0.668	0.694	1
2019-09-04	0.241404	0.305053	0.446	0.472	1
Flt4	0.37638	0.456852	0.424	0.472	1
Nudt3	0.413754	0.307417	0.444	0.461	1
Cebpb	0.815146	0.269696	0.353	0.353	1
Serping1	0.99592	0.3179	0.287	0.298	1

## Sheet: Mammary_Gland
	p_val	avg_logFC	pct.1	pct.2	p_val_adj
Csf3	9.23914e-54	2.5345	0.265	0.011	1.98411e-49
Sphk1	1.57928e-38	0.898824	0.51	0.059	3.3915e-34
Fosl1	1.58808e-33	0.598951	0.388	0.04	3.41039e-29
Rab20	5.63992e-32	1.00927	0.51	0.071	1.21117e-27
Adamts4	2.64066e-31	1.41448	0.531	0.081	5.67082e-27
Efhd1	2.5565e-30	1.16736	0.408	0.048	5.49008e-26
Socs3	6.63448e-29	1.53508	0.959	0.365	1.42475e-24
Gprc5a	6.35775e-26	1.32936	0.49	0.078	1.36533e-21
Gadd45g	8.23863e-25	1.53508	0.898	0.337	1.76925e-20
Litaf	1.56633e-23	1.63951	0.98	0.52	3.3637e-19
Il6	3.46503e-23	1.86093	0.347	0.045	7.44116e-19
Emp1	5.58034e-23	2.37462	0.878	0.378	1.19838e-18
Tgif1	1.0207e-22	1.30388	0.592	0.134	2.19195e-18
Lmna	1.40743e-22	2.02607	0.939	0.618	3.02246e-18
Stx11	5.32927e-22	0.985565	0.347	0.048	1.14446e-17
Arid5a	5.74296e-22	1.31944	0.735	0.213	1.2333e-17
Trex1	5.79952e-21	1.25589	0.694	0.202	1.24545e-16
Kdm6b	4.62137e-20	1.01054	0.98	0.688	9.92439e-16
Casp4	1.14803e-19	0.720006	0.551	0.126	2.4654e-15
Tnfrsf10b	3.63022e-19	1.17558	0.755	0.27	7.7959e-15
Csf2rb2	2.31256e-18	0.412307	0.306	0.043	4.96623e-14
Pde12	2.51902e-18	0.841741	0.551	0.128	5.4096e-14
Snai1	4.24395e-18	0.625411	0.388	0.071	9.11388e-14
Eps8l2	1.38221e-17	1.22773	0.531	0.127	2.9683e-13
Sbno2	4.00809e-17	0.985879	0.735	0.271	8.60738e-13
Fosl2	7.10002e-17	1.13167	0.796	0.344	1.52473e-12
Eif1a	9.66769e-17	1.33498	0.755	0.319	2.07614e-12
Ier3	1.8702e-16	1.36462	0.898	0.471	4.01625e-12
Ccrn4l	5.30931e-16	1.2993	0.571	0.173	1.14017e-11
Bcl3	6.47723e-16	0.892767	0.633	0.193	1.39098e-11
Lrrc32	7.38977e-16	0.850324	0.776	0.273	1.58695e-11
Rnd1	1.33439e-15	1.2752	0.592	0.177	2.8656e-11
Nop58	3.50788e-15	1.03302	0.735	0.291	7.53317e-11
Vmp1	3.73106e-15	1.13143	0.735	0.3	8.01246e-11
Clu	4.15993e-15	1.78526	0.755	0.357	8.93344e-11
Tnfrsf12a	4.53706e-15	0.808606	0.673	0.224	9.74334e-11
Actg1	8.04819e-15	1.29663	1	0.966	1.72835e-10
Tpm3	2.31385e-14	0.86295	0.98	0.852	4.969e-10
Fbln5	3.24253e-14	1.56392	0.592	0.207	6.96333e-10
Rgs16	6.89429e-14	0.726846	0.347	0.07	1.48055e-09
Irgm1	1.25986e-13	1.0064	0.796	0.356	2.70554e-09
Tgtp1	3.12365e-13	1.09382	0.714	0.289	6.70804e-09
Grrp1	4.81701e-13	1.00416	0.776	0.361	1.03445e-08
Tnfrsf1b	5.32716e-13	0.631678	0.429	0.109	1.14401e-08
2210403K04Rik	7.63187e-13	0.446621	0.469	0.125	1.63894e-08
Mnda	7.82752e-13	0.667579	0.286	0.054	1.68096e-08
Synpo	7.8811e-13	0.834519	0.51	0.152	1.69247e-08
Dusp5	1.13448e-12	0.436008	0.367	0.086	2.4363e-08
Hbegf	1.29466e-12	1.91022	0.673	0.289	2.78029e-08
Midn	2.30617e-12	0.273196	0.939	0.563	4.9525e-08
Uap1	2.76093e-12	1.71375	0.673	0.319	5.9291e-08
Azin1	2.86217e-12	0.922497	0.714	0.321	6.14651e-08
Pvr	3.87004e-12	0.869716	0.633	0.252	8.31091e-08
Eif4a1	4.21212e-12	0.814638	0.898	0.695	9.04553e-08
Ubc	6.16107e-12	0.845816	1	0.953	1.32309e-07
Iigp1	8.98773e-12	1.28225	0.796	0.389	1.93012e-07
Tnfaip8l1	1.7037e-11	0.621119	0.531	0.166	3.65871e-07
Arc	1.7214e-11	0.590168	0.306	0.065	3.69671e-07
Tuba1c	1.73333e-11	1.42412	0.837	0.604	3.72233e-07
Plaur	1.749e-11	1.506	0.673	0.306	3.75597e-07
Eif1	1.75532e-11	0.664454	1	0.976	3.76955e-07
Sat1	2.0202e-11	1.27736	0.878	0.661	4.33838e-07
Zfp593	2.76192e-11	0.545071	0.347	0.083	5.93122e-07
Procr	2.99906e-11	0.75815	0.408	0.11	6.44048e-07
Btg1	3.00754e-11	1.07551	0.898	0.686	6.45869e-07
Adamts9	5.2217e-11	0.422373	0.531	0.167	1.12136e-06
Nfe2l2	6.53985e-11	0.99137	0.816	0.56	1.40443e-06
Sertad1	7.52718e-11	0.740944	0.837	0.435	1.61646e-06
Junb	8.69256e-11	1.01428	0.98	0.763	1.86673e-06
Rcan1	9.88265e-11	1.58927	0.571	0.235	2.1223e-06
Fosb	1.30115e-10	0.534334	0.776	0.366	2.79422e-06
Csrnp1	1.31436e-10	0.817471	0.755	0.375	2.82258e-06
Bag3	1.34662e-10	0.89247	0.776	0.458	2.89186e-06
Birc3	1.51523e-10	0.924519	0.449	0.142	3.25396e-06
Osmr	1.672e-10	0.706756	0.796	0.431	3.59062e-06
Tnfaip2	1.97456e-10	0.497481	0.408	0.117	4.24036e-06
Map2k3	2.87616e-10	1.17493	0.673	0.332	6.17656e-06
Col8a1	4.10833e-10	0.609881	0.306	0.073	8.82264e-06
Ppp1r18	4.28192e-10	0.411278	0.612	0.268	9.19542e-06
Cdkn1a	6.20534e-10	0.77839	0.98	0.825	1.3326e-05
Ifrd1	8.38283e-10	0.981815	0.735	0.387	1.80021e-05
Tubb6	1.32221e-09	1.54418	0.49	0.199	2.83946e-05
H3f3b	1.33005e-09	0.587408	1	0.948	2.85628e-05
Ccnl1	1.47037e-09	1.04812	0.816	0.494	3.15762e-05
D730005E14Rik	4.18743e-09	0.703002	0.306	0.079	8.9925e-05
Efhd2	4.26022e-09	0.605025	0.531	0.205	9.14882e-05
Rlim	4.76583e-09	0.595772	0.776	0.413	0.000102346
BC031781	4.8505e-09	0.467869	0.571	0.23	0.000104165
Myc	5.72429e-09	1.19605	0.367	0.119	0.000122929
Gramd1a	7.45988e-09	0.492944	0.429	0.145	0.000160201
Nfil3	7.86714e-09	0.736789	0.388	0.125	0.000168947
Atf3	8.76975e-09	0.877729	0.837	0.475	0.00018833
Tm4sf1	1.20656e-08	0.939094	0.98	0.875	0.000259108
Trib1	1.21527e-08	0.471701	0.51	0.197	0.000260978
Lrrfip1	1.23405e-08	0.818978	0.653	0.337	0.000265011
Sdcbp	1.39096e-08	0.831226	0.918	0.757	0.000298708
Sqstm1	1.40368e-08	1.1525	0.959	0.792	0.000301441
Pfkp	1.60542e-08	0.769008	0.571	0.253	0.000344764
Apold1	1.83458e-08	0.617005	0.939	0.646	0.000393975
Ripk3	1.9194e-08	0.522679	0.367	0.11	0.000412191
Eef1a1	2.51014e-08	0.441322	1	0.996	0.000539052
Bhlhe40	2.55084e-08	0.616717	0.633	0.3	0.000547794
Mt2	2.59944e-08	1.39316	0.571	0.287	0.000558229
Nfkbia	3.35687e-08	0.949579	0.98	0.912	0.000720887
Txnrd1	3.64606e-08	0.516023	0.551	0.234	0.000782991
Nhp2l1	3.80627e-08	0.68333	0.837	0.536	0.000817397
Stom	4.35533e-08	0.65936	0.633	0.297	0.000935306
Pdlim1	5.12718e-08	1.28435	0.714	0.46	0.00110106
Tiparp	5.14213e-08	0.540256	0.469	0.179	0.00110427
Il4ra	6.58191e-08	0.559189	0.633	0.293	0.00141346
Ier5l	8.30623e-08	0.493726	0.571	0.26	0.00178376
Ywhaz	8.74518e-08	0.503008	0.959	0.932	0.00187803
Fam176a	9.85183e-08	0.669944	0.388	0.132	0.00211568
B4galt1	1.12865e-07	0.761865	0.776	0.563	0.00242377
S100a6	1.23092e-07	0.607694	0.735	0.419	0.00264341
Itga5	1.45442e-07	0.358542	0.612	0.269	0.00312337
4933407C03Rik	1.46158e-07	0.769144	0.714	0.423	0.00313874
Isg15	1.53202e-07	0.464129	0.633	0.324	0.00329001
Pcna	1.59582e-07	0.792208	0.694	0.404	0.00342703
Irf7	1.65235e-07	0.414082	0.571	0.245	0.00354841
Slc39a1	1.66352e-07	0.398829	0.898	0.781	0.00357242
Nr4a2	1.77944e-07	0.637147	0.49	0.197	0.00382135
Ypel2	2.11681e-07	0.506132	0.449	0.182	0.00454584
Pde4b	2.12634e-07	0.810501	0.776	0.478	0.00456631
Rel	2.6107e-07	0.413906	0.327	0.106	0.00560648
Igf2	2.97503e-07	0.311575	0.327	0.104	0.00638887
Tuba4a	3.30447e-07	0.589387	0.449	0.178	0.00709634
Srxn1	3.30634e-07	0.612878	0.327	0.107	0.00710037
Ptma	3.59175e-07	0.511887	0.98	0.952	0.00771329
Rabgef1	3.60464e-07	0.437906	0.469	0.198	0.00774097
Zfand2a	3.79479e-07	0.394255	0.408	0.151	0.00814932
Clic4	3.87298e-07	0.545961	0.98	0.862	0.00831722
Jak2	3.90694e-07	0.338126	0.449	0.18	0.00839016
Gja1	4.21057e-07	0.978896	0.776	0.502	0.0090422
Dnajb1	4.67003e-07	0.803367	0.714	0.461	0.0100289
Trpv4	4.71951e-07	0.309827	0.306	0.092	0.0101352
Cfb	5.10086e-07	0.616994	0.265	0.077	0.0109541
Ptrf	5.2626e-07	0.473591	1	0.929	0.0113014
St8sia6	5.37942e-07	0.282915	0.306	0.092	0.0115523
Hspa8	5.43456e-07	0.700683	1	0.966	0.0116707
Fbln2	5.45975e-07	0.664074	0.633	0.319	0.0117248
Emp3	5.61338e-07	0.42659	0.469	0.196	0.0120547
Ncoa7	5.84245e-07	0.481067	0.408	0.161	0.0125467
Pqlc1	6.30275e-07	0.63817	0.531	0.243	0.0135352
Gadd45b	6.4918e-07	0.810596	0.531	0.242	0.0139411
Dnajb9	6.59499e-07	0.797048	0.633	0.357	0.0141627
Hmox1	6.92478e-07	1.20856	0.408	0.163	0.014871
Rbm38	7.06967e-07	0.369728	0.265	0.079	0.0151821
Nol10	7.15894e-07	0.298659	0.327	0.105	0.0153738
Kazn	7.34782e-07	0.489861	0.265	0.077	0.0157795
Mafk	7.69181e-07	0.752253	0.592	0.321	0.0165182
Rps2	8.00236e-07	0.54935	0.959	0.824	0.0171851
Atf4	9.84832e-07	0.827282	0.796	0.556	0.0211493
Plk3	1.03084e-06	0.758614	0.408	0.169	0.0221372
Glul	1.15148e-06	0.903464	0.837	0.617	0.024728
Ier5	1.19259e-06	0.777573	0.735	0.48	0.0256109
Etf1	1.23168e-06	0.617103	0.551	0.287	0.0264503
Zfand5	1.25113e-06	0.806551	0.755	0.547	0.026868
Nfkbiz	1.2711e-06	0.638861	0.673	0.386	0.027297
Irf1	1.29899e-06	1.00623	0.735	0.538	0.0278957
Relb	1.3439e-06	0.329234	0.367	0.13	0.0288602
Cd63	1.55777e-06	1.01023	0.592	0.344	0.033453
Tmed5	1.57291e-06	0.617054	0.735	0.475	0.0337783
Hdc	1.6922e-06	0.521316	0.265	0.079	0.0363399
Trim25	1.70287e-06	0.512172	0.673	0.371	0.0365691
Tagln2	1.79597e-06	0.553764	0.918	0.875	0.0385685
Lrg1	1.91951e-06	1.04529	0.388	0.158	0.0412214
Ptbp1	2.05365e-06	0.556952	0.653	0.374	0.0441022
Hspa5	2.11057e-06	0.680013	0.959	0.856	0.0453245
Jund	2.14996e-06	0.448811	0.939	0.82	0.0461704
Tmem173	2.23525e-06	0.675052	0.49	0.223	0.0480019
Cd24a	2.38925e-06	0.427383	0.551	0.258	0.0513092
Ifi47	2.48137e-06	0.933624	0.49	0.244	0.0532875
Anxa7	2.70345e-06	0.532062	0.776	0.457	0.0580566
Slc25a5	2.72474e-06	0.557122	0.939	0.781	0.0585138
Tcf7l2	3.04643e-06	0.414331	0.633	0.358	0.0654221
Prkab1	3.3303e-06	0.518394	0.551	0.266	0.0715182
Rhoc	3.79952e-06	0.52042	0.857	0.631	0.0815946
Ifitm3	3.90496e-06	0.499046	0.959	0.969	0.083859
Krt17	3.99555e-06	0.395241	0.306	0.109	0.0858044
Avpi1	4.39062e-06	0.351229	0.367	0.141	0.0942885
Bzw1	4.503e-06	0.363657	0.735	0.431	0.096702
Ppp1r15a	4.50854e-06	0.853723	0.735	0.481	0.0968208
Zfp36	4.6451e-06	1.08365	0.857	0.782	0.0997535
Tceb1	4.84983e-06	0.523378	0.673	0.432	0.10415
Adcy4	5.1524e-06	0.412679	0.816	0.5	0.110648
Pnp	5.27912e-06	0.566724	0.735	0.464	0.113369
Bcl10	5.56355e-06	0.503255	0.612	0.345	0.119477
Bcr	5.67629e-06	0.930797	0.367	0.155	0.121898
Cnn3	6.16433e-06	0.637112	0.878	0.746	0.132379
Eif5	6.61074e-06	0.562267	0.796	0.576	0.141966
Pim3	6.86098e-06	0.709316	0.776	0.562	0.14734
Lrrc8a	7.48271e-06	0.320943	0.959	0.869	0.160691
Icam1	8.12279e-06	0.563365	0.653	0.386	0.174437
Ubap1	1.18226e-05	0.505328	0.367	0.15	0.253891
Actb	1.29945e-05	0.520747	1	1	0.279057
Entpd1	1.49051e-05	0.663705	0.653	0.392	0.320088
Rps25	1.50447e-05	0.298116	1	0.903	0.323084
Ddx3x	1.70729e-05	0.488929	0.878	0.656	0.366641
Cnnm4	1.73789e-05	0.326404	0.388	0.16	0.373213
N4bp1	1.78746e-05	0.298021	0.469	0.216	0.383857
Gpx1	1.83707e-05	0.534645	0.918	0.774	0.394511
Mfsd10	1.97286e-05	0.43948	0.347	0.138	0.423672
Mt1	2.0059e-05	1.54636	0.633	0.454	0.430767
Arid5b	2.03549e-05	0.442218	0.776	0.512	0.437122
Ripk1	2.10131e-05	0.545434	0.51	0.251	0.451257
Ppp2r2a	2.11533e-05	0.566916	0.612	0.368	0.454267
Csf2rb	2.21272e-05	1.09843	0.286	0.104	0.475183
Nr4a1	2.26193e-05	0.628899	0.735	0.508	0.48575
Lgals3	2.75268e-05	0.294384	0.347	0.142	0.591137
Papss2	2.96448e-05	0.465213	0.49	0.242	0.636622
Tmem33	3.11446e-05	0.545821	0.551	0.315	0.668831
Mat2a	3.53444e-05	0.629576	0.837	0.616	0.75902
Errfi1	3.83609e-05	0.588533	0.469	0.26	0.823799
Srsf10	3.91499e-05	0.311223	0.694	0.413	0.840743
Hnrnpab	3.99964e-05	0.467146	0.857	0.718	0.858923
Myd88	4.1625e-05	0.902487	0.408	0.196	0.893898
Tifa	4.63352e-05	0.372718	0.286	0.109	0.995048
Nfkb2	4.72198e-05	0.386399	0.347	0.149	1
Stat3	5.11205e-05	0.743103	0.694	0.509	1
Tes	5.15694e-05	0.529989	0.449	0.209	1
Ubb	5.20371e-05	0.258209	1	0.99	1
Mast4	5.21027e-05	0.566004	0.551	0.313	1
Ralb	5.32387e-05	0.524058	0.714	0.489	1
Arf4	5.39936e-05	0.518977	0.816	0.639	1
Hsp90aa1	5.69682e-05	0.468432	0.857	0.721	1
Prr13	6.0438e-05	0.443592	0.755	0.539	1
Ube2d3	6.4139e-05	0.52645	0.837	0.718	1
Alpl	6.92971e-05	0.655201	0.449	0.219	1
Upp1	7.21993e-05	1.09112	0.347	0.156	1
Elf1	7.51547e-05	0.429386	0.714	0.491	1
Sod1	8.18183e-05	0.332793	0.98	0.936	1
Eif6	8.43916e-05	0.463634	0.653	0.421	1
Srpk1	8.47158e-05	0.461466	0.367	0.16	1
Plec	8.86574e-05	0.569426	0.776	0.624	1
Rps14	9.17344e-05	0.259071	1	0.957	1
Eif2s2	9.30786e-05	0.362335	0.694	0.518	1
Sntb2	9.9437e-05	0.594327	0.449	0.223	1
Plvap	0.000103185	0.716995	0.633	0.359	1
Cirh1a	0.000129169	0.422933	0.286	0.118	1
Gpr56	0.000131287	0.269675	0.816	0.557	1
Gch1	0.000132329	0.526849	0.571	0.335	1
1110007C09Rik	0.000136	0.25336	0.571	0.329	1
Ppa1	0.000142324	0.542863	0.367	0.174	1
Nus1	0.000142522	0.469755	0.51	0.29	1
Parp14	0.000148298	0.48074	0.49	0.276	1
Hnrnpf	0.000152337	0.496152	0.898	0.75	1
Gem	0.000154513	0.592003	0.388	0.181	1
P2ry2	0.000159029	0.416601	0.306	0.127	1
Alyref	0.00016845	0.407343	0.551	0.331	1
Srsf7	0.000175697	0.423728	0.633	0.369	1
Rap1b	0.000181626	0.455506	0.878	0.733	1
Orai1	0.000183363	0.559286	0.449	0.25	1
Nup62	0.000193758	0.563704	0.306	0.129	1
Pnrc1	0.000195096	0.503927	0.796	0.629	1
Plscr1	0.00020505	0.754542	0.551	0.32	1
Rbm7	0.000207698	0.494241	0.551	0.343	1
Tspo	0.000239935	0.458991	0.878	0.694	1
Ccdc86	0.000251673	0.278164	0.265	0.102	1
Fxyd5	0.000255058	0.271267	0.837	0.593	1
Lap3	0.000267318	0.61465	0.347	0.163	1
Nolc1	0.000267676	0.435703	0.408	0.204	1
Ppp1cc	0.000274079	0.324703	0.551	0.353	1
Slc35e4	0.000275671	0.427183	0.327	0.144	1
Foxn3	0.000284718	0.375413	0.755	0.492	1
Rpl4	0.000292805	0.368393	0.959	0.876	1
Ppme1	0.000300074	0.508789	0.388	0.192	1
Klf10	0.000305914	0.258994	0.592	0.371	1
Trim30a	0.000307258	0.290542	0.551	0.312	1
Cdc42ep4	0.000310966	0.405035	0.551	0.314	1
Rhoj	0.000315366	0.576119	0.755	0.592	1
Tgoln1	0.000343625	0.396556	0.694	0.48	1
Hnrnpc	0.000346677	0.400149	0.878	0.699	1
Cish	0.000370729	0.375501	0.429	0.216	1
Siah2	0.000388927	0.44805	0.265	0.11	1
Nampt	0.000392272	0.420229	0.469	0.259	1
Impdh2	0.000428327	0.384466	0.49	0.279	1
Mmrn2	0.000430613	0.257939	0.898	0.702	1
Mcl1	0.000432063	0.496212	0.816	0.678	1
Dtx3l	0.000437693	0.263471	0.49	0.27	1
Cttn	0.00045709	0.355309	0.531	0.314	1
Chn2	0.000468915	0.323797	0.286	0.123	1
Daxx	0.00047968	0.544613	0.306	0.143	1
Eif4e	0.000488921	0.256683	0.531	0.303	1
Rab33b	0.000531117	0.266732	0.265	0.11	1
Taf7	0.000537326	0.308029	0.469	0.262	1
Tor1aip1	0.00054922	0.369771	0.694	0.488	1
Pdlim4	0.000561487	0.614154	0.265	0.115	1
Plekho2	0.000566368	0.260714	0.388	0.2	1
Pls3	0.000572903	0.250912	0.816	0.547	1
Ebf1	0.000603822	0.506068	0.531	0.316	1
Akap2	0.000643602	0.500653	0.898	0.776	1
Ezr	0.000655749	0.469416	0.286	0.135	1
Iqgap1	0.000692599	0.368465	0.898	0.78	1
Ece1	0.00069699	0.292189	0.939	0.856	1
AI848100	0.000697235	0.291835	0.327	0.155	1
Skil	0.000701165	0.465116	0.694	0.53	1
Pmp22	0.000757875	0.354002	0.694	0.481	1
Adamts1	0.000773869	0.539954	0.776	0.577	1
Ube2f	0.000776741	0.325892	0.367	0.187	1
Brd2	0.000786512	0.371796	0.694	0.506	1
Cdkn2d	0.00081424	0.496808	0.327	0.162	1
Ncl	0.000816454	0.685015	0.857	0.751	1
Ifit1	0.000854688	1.10349	0.388	0.212	1
Stc1	0.000873181	1.0077	0.265	0.122	1
Arpc5	0.000911467	0.424906	0.816	0.66	1
Nfatc1	0.000970357	0.274156	0.49	0.278	1
1810013L24Rik	0.000996747	0.646694	0.449	0.265	1
Igtp	0.00103408	0.318289	0.531	0.314	1
Bcar1	0.00104713	0.645086	0.51	0.335	1
Socs5	0.00104826	0.510802	0.429	0.255	1
S100a10	0.00106357	0.435827	0.796	0.693	1
Egr1	0.0010639	0.979178	0.816	0.662	1
Rasip1	0.00114015	0.353613	0.857	0.732	1
0610010O12Rik	0.00114041	0.363912	0.286	0.134	1
Tpt1	0.00114158	0.268927	0.939	0.938	1
Odc1	0.00123973	0.783941	0.367	0.209	1
Mid1ip1	0.00126949	0.251624	0.388	0.206	1
Cd9	0.00128694	0.308199	0.918	0.709	1
Nfkbib	0.00131869	0.437031	0.388	0.215	1
Cltb	0.00133855	0.468307	0.714	0.581	1
Pdlim7	0.00138177	0.370282	0.49	0.315	1
Uaca	0.0014044	0.523333	0.592	0.389	1
Tra2b	0.00140596	0.376383	0.755	0.588	1
Kdm5c	0.00150826	0.287979	0.388	0.207	1
Ptpn12	0.00153116	0.368101	0.449	0.277	1
Gabarap	0.00156129	0.333488	0.796	0.746	1
Aff4	0.00157374	0.553806	0.551	0.35	1
Chic2	0.00157761	0.455873	0.408	0.247	1
Tmem176b	0.00162338	0.369228	0.735	0.512	1
Sdc4	0.00162672	0.543546	0.633	0.403	1
Npm1	0.00171483	0.357487	0.776	0.645	1
Coq10b	0.00182927	0.471039	0.429	0.247	1
Stk38l	0.0019422	0.27287	0.327	0.173	1
Crtc2	0.00194809	0.696367	0.347	0.185	1
Zswim6	0.00197269	0.44546	0.306	0.151	1
Serp1	0.00201002	0.304143	0.51	0.322	1
Ecscr	0.00206466	0.273243	0.857	0.628	1
Timeless	0.00211635	0.430836	0.306	0.158	1
Rtp4	0.00213027	0.707435	0.531	0.371	1
Txnl1	0.00216677	0.320948	0.531	0.361	1
Dnttip2	0.0021728	0.393026	0.49	0.308	1
Crip1	0.00222215	0.431317	0.878	0.779	1
Nme2	0.00231822	0.290108	0.816	0.677	1
Chd1	0.00237833	0.64449	0.51	0.332	1
Tgtp2	0.00238967	0.518564	0.612	0.422	1
Clic1	0.00254887	0.429398	0.816	0.775	1
Jag1	0.00276483	0.617633	0.571	0.4	1
Angptl4	0.00279263	0.811039	0.347	0.197	1
Gbp6	0.00295607	0.304658	0.265	0.13	1
Ninj1	0.00300429	0.491658	0.449	0.295	1
Gapdh	0.00301977	0.332422	0.939	0.872	1
Vim	0.00326315	0.462427	0.878	0.801	1
Cebpb	0.00327882	0.259244	0.51	0.351	1
Pkig	0.00328438	0.356315	0.51	0.337	1
Arf6	0.00333871	0.278478	0.816	0.651	1
E030010A14Rik	0.00344773	0.950681	0.388	0.237	1
Rnf125	0.0037419	0.384794	0.571	0.399	1
Capg	0.00380364	0.278865	0.429	0.259	1
Hnrnph2	0.00388573	0.373385	0.551	0.374	1
Ptpn1	0.00390144	0.671886	0.429	0.288	1
Cfl1	0.00399473	0.297975	0.939	0.955	1
Strap	0.00419943	0.511598	0.51	0.365	1
Socs2	0.00455192	0.422649	0.469	0.294	1
Cdv3	0.00468739	0.502021	0.673	0.574	1
A4galt	0.00498511	0.264858	0.265	0.129	1
Nufip2	0.005015	0.28666	0.714	0.552	1
Ednrb	0.00502852	0.253999	0.571	0.38	1
Eif5a	0.00521321	0.383865	0.878	0.776	1
Prdx6	0.0056807	0.361665	0.551	0.362	1
Sox17	0.00589102	0.343203	0.735	0.518	1
Mapre1	0.00598116	0.354951	0.673	0.565	1
Klf6	0.00618333	0.314687	0.857	0.718	1
Atp1b3	0.0062862	0.348073	0.857	0.699	1
Ets1	0.00629381	0.590523	0.878	0.786	1
Anxa2	0.00639351	0.464471	0.878	0.829	1
Dstn	0.00641216	0.333994	0.837	0.629	1
Zrsr2	0.00648226	0.310556	0.367	0.217	1
Serpinb1a	0.00675464	0.876742	0.306	0.169	1
Slfn2	0.00683741	0.464374	0.327	0.19	1
Fam129b	0.00691313	0.500992	0.469	0.312	1
Fos	0.00699164	0.579521	0.857	0.768	1
Ccdc6	0.0070044	0.352429	0.388	0.232	1
Usp37	0.00755654	0.252564	0.327	0.185	1
Cited2	0.00809594	0.261043	0.367	0.207	1
Lpgat1	0.00817406	0.276488	0.265	0.135	1
Arpc2	0.00837971	0.255974	0.857	0.807	1
Syne2	0.00864603	0.563894	0.551	0.378	1
Rftn1	0.00865445	0.261092	0.449	0.281	1
Ptp4a2	0.00908477	0.286891	0.796	0.74	1
Csrp1	0.00908606	0.290861	0.735	0.561	1
Anxa1	0.0100827	0.743941	0.449	0.299	1
Rbm18	0.0101408	0.450528	0.388	0.247	1
Slc38a2	0.0103707	0.59234	0.673	0.504	1
Hspa1a	0.010373	0.575809	0.551	0.382	1
Gna13	0.0104574	0.491024	0.367	0.237	1
Morf4l2	0.0106388	0.367249	0.694	0.533	1
Actr3	0.0111348	0.473292	0.633	0.496	1
Gnl3	0.0113658	0.497535	0.286	0.168	1
Il2rg	0.0120351	0.287609	0.653	0.441	1
Rps7	0.012264	0.321149	0.939	0.847	1
Eef1g	0.012276	0.273646	0.735	0.588	1
Wsb1	0.0126312	0.463653	0.531	0.39	1
2019-09-11	0.0129339	0.556606	0.612	0.474	1
Rnps1	0.0130269	0.254761	0.449	0.306	1
Ddx5	0.0131444	0.282532	0.898	0.852	1
Rara	0.0131858	0.285931	0.327	0.185	1
Gas7	0.0132988	0.69823	0.286	0.173	1
Phf23	0.0137016	0.514874	0.286	0.161	1
Acot9	0.013987	0.302238	0.449	0.288	1
Slc3a2	0.0143062	0.29357	0.816	0.673	1
Scpep1	0.0149513	0.295473	0.286	0.161	1
Gpr146	0.0155869	0.481786	0.592	0.455	1
Rassf1	0.0162411	0.370682	0.571	0.45	1
Hn1	0.0172412	0.455613	0.49	0.357	1
Tmem47	0.0173992	0.330756	0.347	0.206	1
Scarb1	0.0175867	0.608929	0.653	0.581	1
Trim16	0.0176865	0.464329	0.306	0.192	1
S100a11	0.0181253	0.291909	0.755	0.701	1
Zfp948	0.018359	0.271607	0.286	0.165	1
Slc6a6	0.0186933	0.342918	0.755	0.564	1
B3gnt2	0.0193826	0.525301	0.51	0.371	1
Tnfrsf1a	0.0195383	0.28	0.653	0.571	1
Smarca5	0.0197078	0.253451	0.531	0.388	1
B3gnt3	0.0197622	0.318545	0.408	0.263	1
Rnh1	0.0209395	0.381616	0.531	0.408	1
Phax	0.0210054	0.291654	0.388	0.233	1
5430417L22Rik	0.0243055	0.459062	0.388	0.265	1
Ckb	0.0251792	0.464167	0.449	0.337	1
Rela	0.0273763	0.321769	0.551	0.439	1
Tor1aip2	0.0277192	0.304041	0.469	0.346	1
Baz1a	0.0283065	0.329992	0.265	0.159	1
Stmn2	0.0288486	0.307789	0.408	0.264	1
Zfp655	0.030985	0.35212	0.306	0.2	1
Set	0.0312025	0.2522	0.776	0.697	1
Cebpd	0.0314972	0.372441	0.673	0.564	1
Mdm2	0.031501	0.363851	0.347	0.23	1
Nars	0.0322959	0.354677	0.469	0.333	1
Pkm2	0.0339959	0.396758	0.837	0.708	1
Wsb2	0.0347175	0.252668	0.388	0.263	1
Tinagl1	0.0359813	0.383428	0.816	0.808	1
Rasd1	0.0367072	0.285082	0.388	0.255	1
Slc5a3	0.0381368	0.32047	0.265	0.163	1
Diap2	0.0405133	0.324735	0.265	0.162	1
Tubb4b	0.0410111	0.290322	0.816	0.71	1
Ski	0.0424307	0.252413	0.429	0.301	1
Akap12	0.0438314	0.56127	0.633	0.591	1
Tspan31	0.0449403	0.250078	0.531	0.39	1
Srsf5	0.0459571	0.333596	0.673	0.718	1
Ccnd2	0.0468819	0.447225	0.592	0.518	1
Anapc2	0.0470739	0.303134	0.184	0.325	1
Dnaja4	0.0475418	0.460376	0.265	0.167	1
Ppp2ca	0.0497105	0.372671	0.653	0.553	1
Tppp3	0.0543248	0.290384	0.429	0.311	1
Peli1	0.0609479	0.283531	0.429	0.324	1
Lima1	0.0635968	0.311651	0.49	0.376	1
Adam15	0.0680235	0.326148	0.653	0.624	1
Sf3b1	0.0703937	0.254062	0.653	0.577	1
Ier2	0.0710569	0.264709	0.857	0.794	1
Sf3b3	0.0744544	0.681396	0.306	0.197	1
Dazap2	0.0769099	0.333621	0.837	0.731	1
Rbm25	0.0771698	0.269148	0.531	0.461	1
Rai12	0.0772489	0.440473	0.347	0.245	1
Wls	0.0779021	0.405621	0.388	0.293	1
U2af2	0.0857976	0.261375	0.449	0.334	1
Serpinb6a	0.0900713	0.255827	0.673	0.543	1
Cdc42ep3	0.091571	0.26231	0.612	0.479	1
Tcf7l1	0.0925553	0.380276	0.306	0.222	1
Hexim1	0.0971754	0.344053	0.306	0.207	1
Ran	0.115746	0.286281	0.592	0.523	1
Tab2	0.118923	0.321356	0.327	0.245	1
Nos3	0.122025	0.359538	0.571	0.489	1
1300014I06Rik	0.125244	0.293013	0.429	0.348	1
Sptlc2	0.128231	0.304766	0.408	0.352	1
Keap1	0.128566	0.515195	0.143	0.251	1
Gdi1	0.139416	0.297878	0.49	0.4	1
Fhl1	0.139536	0.382609	0.347	0.269	1
Anp32b	0.143073	0.286601	0.51	0.478	1
H2afz	0.156235	0.256181	0.633	0.592	1
Dll4	0.170581	0.332684	0.449	0.383	1
Itpripl1	0.17451	0.332412	0.51	0.457	1
Sar1a	0.180554	0.264591	0.551	0.495	1
Wdr1	0.191743	0.268246	0.694	0.577	1
Tpd52	0.196731	0.313357	0.347	0.264	1
Abcf1	0.20946	0.336188	0.449	0.352	1
Psmd12	0.22146	0.292431	0.408	0.365	1
Cdk9	0.223906	0.335064	0.367	0.276	1
Anapc5	0.22812	0.402371	0.551	0.453	1
Cct2	0.24101	0.500173	0.429	0.376	1
Sh3glb1	0.255875	0.315615	0.755	0.735	1
2400003C14Rik	0.273715	0.301591	0.388	0.322	1
Oasl2	0.274637	0.420957	0.306	0.238	1
Bdp1	0.326295	0.519594	0.265	0.212	1
Btg2	0.338626	0.48262	0.816	0.848	1
Lzts2	0.346958	0.738437	0.367	0.301	1
Hnrnpa0	0.351541	0.588251	0.531	0.493	1
Ddhd2	0.364706	0.420794	0.265	0.218	1
Shc1	0.450862	0.292062	0.265	0.212	1
Lpcat3	0.460311	0.318308	0.286	0.26	1
Ep400	0.495776	0.284681	0.245	0.319	1
Pfkl	0.558863	0.40268	0.245	0.281	1
Dlc1	0.595965	0.271355	0.531	0.61	1
Aggf1	0.613429	0.320956	0.286	0.261	1
Plat	0.626382	0.279618	0.367	0.394	1
Tmf1	0.642757	0.257372	0.673	0.594	1
Fn1	0.665948	0.327771	0.245	0.278	1
Igfbp7	0.673945	0.349995	0.878	0.859	1
Stx4a	0.6863	0.405753	0.265	0.241	1
Man2b1	0.776565	0.319927	0.286	0.272	1
Plk2	0.834946	0.331902	0.612	0.604	1
Cyr61	0.858537	0.821909	0.51	0.536	1
Hdlbp	0.862405	0.452141	0.327	0.337	1
Acadm	0.876115	0.448023	0.265	0.262	1
1810011O10Rik	0.89373	0.260573	0.673	0.61	1
Ddx54	0.896414	0.272682	0.265	0.257	1
Fam120a	0.910233	0.299528	0.367	0.381	1
Ceacam1	0.911349	0.392146	0.51	0.553	1
Ctla2a	0.981013	0.300431	0.633	0.721	1

## Sheet: Muscle
	p_val	avg_logFC	pct.1	pct.2	p_val_adj
Rnd1	5.44066e-112	2.22527	0.7	0.155	1.16838e-107
Adamts4	6.14063e-105	1.70307	0.479	0.065	1.3187e-100
Sphk1	7.55062e-68	1.14174	0.343	0.05	1.6215e-63
Socs3	1.57424e-62	1.37395	0.803	0.348	3.38069e-58
Kdm6b	8.6234e-60	1.22278	0.901	0.68	1.85187e-55
Litaf	1.1193e-59	1.55065	0.887	0.506	2.40369e-55
Irf1	1.78465e-57	2.02062	0.84	0.525	3.83253e-53
Lmna	2.62728e-55	1.74336	0.869	0.608	5.64209e-51
Arid5a	8.54193e-55	1.50049	0.596	0.199	1.83438e-50
Pde12	4.73905e-54	1.07243	0.469	0.115	1.01771e-49
Cdkn1a	1.09755e-51	1.30385	0.944	0.821	2.35699e-47
Ccrn4l	2.06722e-51	0.998889	0.54	0.159	4.43936e-47
Pdlim1	5.20891e-51	1.49438	0.803	0.445	1.11861e-46
Gadd45g	1.06597e-49	1.59107	0.714	0.324	2.28918e-45
Slc10a6	1.15991e-48	1.47903	0.469	0.131	2.49092e-44
Atf3	3.72244e-47	1.6258	0.836	0.46	7.99394e-43
Gja1	1.85678e-44	1.3198	0.84	0.487	3.98743e-40
Gadd45b	1.38468e-43	1.40433	0.582	0.228	2.97359e-39
Tmem173	2.85742e-42	1.33082	0.563	0.208	6.13632e-38
Apold1	4.55188e-41	1.16805	0.883	0.637	9.77517e-37
Prkcc	1.48969e-40	0.522832	0.263	0.047	3.1991e-36
Ier3	7.68463e-40	1.44934	0.775	0.46	1.65027e-35
Tnfrsf10b	4.53539e-39	0.950017	0.61	0.258	9.73975e-35
Hspa8	9.86141e-39	0.93968	0.986	0.966	2.11774e-34
Sbno2	1.21571e-38	1.07894	0.615	0.259	2.61073e-34
Ifrd1	5.2961e-38	1.15088	0.723	0.374	1.13734e-33
Plaur	5.53989e-38	1.75895	0.629	0.294	1.18969e-33
Tpm3	1.93224e-36	0.923262	0.939	0.848	4.14948e-32
Trex1	3.55269e-36	1.27499	0.512	0.191	7.62941e-32
Nfkbia	8.83492e-36	1.20561	0.944	0.911	1.8973e-31
Bcl3	2.36258e-35	1.06482	0.507	0.181	5.07365e-31
Icam1	2.49352e-35	1.92072	0.676	0.373	5.35484e-31
Iigp1	1.67629e-33	1.2839	0.7	0.378	3.59983e-29
Fosl2	3.20252e-33	1.02586	0.657	0.333	6.8774e-29
Junb	1.03278e-32	0.905109	0.934	0.757	2.21791e-28
Cxcl1	1.98475e-32	1.69775	0.455	0.175	4.26226e-28
Fosb	3.90991e-30	1.08156	0.671	0.355	8.39654e-26
Fxyd4	4.04041e-30	0.618284	0.272	0.067	8.67678e-26
Hspa5	6.0403e-30	1.00455	0.92	0.853	1.29715e-25
Zfp36	1.2467e-29	1.0022	0.92	0.775	2.6773e-25
Pim3	2.0221e-29	1.09072	0.775	0.553	4.34246e-25
Ubc	5.17128e-29	0.731931	0.977	0.953	1.11053e-24
Nup210l	2.45387e-28	0.442488	0.31	0.086	5.26968e-24
Timp4	4.53051e-28	0.905291	0.615	0.288	9.72927e-24
Pde4b	5.64774e-28	1.09574	0.732	0.468	1.21285e-23
Ccnl1	6.03792e-28	0.948769	0.77	0.484	1.29664e-23
Midn	7.08037e-28	0.435883	0.784	0.556	1.52051e-23
Pfkfb3	1.14258e-27	0.839355	0.394	0.13	2.45368e-23
Myd88	2.01533e-27	1.0461	0.455	0.185	4.32793e-23
Actg1	2.30185e-27	0.901396	0.986	0.966	4.94323e-23
Nop58	7.49098e-27	0.957835	0.573	0.281	1.60869e-22
Hspb1	8.61107e-27	0.995624	0.925	0.819	1.84923e-22
Adamts9	2.45161e-26	0.639278	0.418	0.158	5.26482e-22
Sertad1	3.3096e-26	1.02261	0.7	0.426	7.10736e-22
Rab20	1.29987e-25	0.886052	0.254	0.067	2.79148e-21
Hsp90aa1	1.7545e-25	1.09456	0.859	0.716	3.76778e-21
Tgtp1	2.59258e-25	1.03527	0.563	0.28	5.56757e-21
Isg15	1.56771e-24	0.730571	0.573	0.314	3.36666e-20
Tubb6	2.41819e-24	1.70835	0.437	0.189	5.19307e-20
Gprc5a	6.27604e-24	0.986394	0.263	0.073	1.34778e-19
Hspa2	9.93323e-24	0.606961	0.404	0.153	2.13316e-19
Ier5l	1.41085e-23	0.711053	0.521	0.25	3.0298e-19
Aqp1	1.53914e-23	1.00512	0.803	0.552	3.3053e-19
Ier5	2.13494e-23	0.851889	0.714	0.471	4.58478e-19
Fbln2	2.60371e-23	0.813859	0.624	0.307	5.59148e-19
Plekho2	4.14883e-23	0.681907	0.446	0.189	8.90962e-19
Hspa1a	4.47209e-23	1.4576	0.657	0.37	9.60382e-19
D730005E14Rik	4.72941e-23	0.734505	0.258	0.072	1.01564e-18
2210403K04Rik	5.02085e-23	0.507817	0.343	0.118	1.07823e-18
Eif1	8.12416e-23	0.563563	0.991	0.976	1.74466e-18
Ifit1	2.24584e-22	1.54357	0.446	0.202	4.82294e-18
Zfand5	2.52329e-22	0.759785	0.765	0.538	5.41876e-18
Socs1	3.28536e-22	0.364396	0.347	0.124	7.05531e-18
Pnp	3.71311e-22	1.09643	0.676	0.456	7.97391e-18
Rel	8.23115e-22	0.332551	0.3	0.098	1.76764e-17
Lnx1	1.32559e-21	0.660156	0.455	0.199	2.8467e-17
Cdh13	1.7901e-21	0.764592	0.671	0.394	3.84423e-17
Tnfrsf12a	2.17089e-21	0.866571	0.455	0.218	4.66198e-17
Txnrd1	4.21466e-21	0.549275	0.498	0.224	9.05098e-17
Tnfaip8l1	4.91774e-21	1.03505	0.39	0.159	1.05609e-16
Fos	1.2556e-20	0.677297	0.911	0.761	2.69639e-16
Srsf2	4.4559e-20	0.896223	0.878	0.824	9.56905e-16
Csrnp1	5.97681e-20	0.700248	0.634	0.366	1.28352e-15
Ppp1r15a	7.40893e-20	0.931222	0.7	0.473	1.59107e-15
Rnf125	8.07368e-20	1.05827	0.634	0.388	1.73382e-15
Dnajb1	1.05135e-19	1.07558	0.685	0.452	2.25777e-15
Tiparp	2.32564e-19	0.872935	0.39	0.172	4.99432e-15
Atf4	4.45106e-19	0.882419	0.728	0.55	9.55864e-15
Flt1	4.90413e-19	0.563061	0.948	0.847	1.05316e-14
Pvr	8.8839e-19	0.730282	0.484	0.245	1.90782e-14
Emp1	9.71635e-19	1.46351	0.568	0.374	2.08659e-14
S100a6	1.0071e-18	0.628753	0.638	0.412	2.16274e-14
Wsb1	1.25258e-18	0.595749	0.638	0.378	2.68991e-14
Malat1	1.27214e-18	0.317791	1	0.997	2.73192e-14
Btg1	2.17522e-18	0.700982	0.836	0.68	4.67129e-14
Ifitm3	2.36106e-18	0.415928	0.981	0.968	5.07038e-14
Pim1	2.43724e-18	0.316216	0.3	0.11	5.23397e-14
Tuba1c	2.46233e-18	1.38965	0.709	0.601	5.28785e-14
Dennd4a	2.53167e-18	0.327847	0.254	0.084	5.43676e-14
Gm12216	3.43972e-18	1.36676	0.376	0.172	7.3868e-14
Lrrc8a	8.33896e-18	0.430491	0.93	0.866	1.79079e-13
Irgm1	9.28762e-18	0.974245	0.582	0.349	1.99452e-13
Klf6	2.75694e-17	0.964925	0.798	0.716	5.92053e-13
Sat1	3.24818e-17	1.04677	0.779	0.658	6.97546e-13
Hbegf	3.81522e-17	1.27758	0.498	0.283	8.19318e-13
C1qtnf9	3.99849e-17	0.507939	0.662	0.376	8.58676e-13
Plk3	5.45903e-17	0.754654	0.371	0.161	1.17233e-12
Mustn1	6.33812e-17	0.589638	0.399	0.179	1.36111e-12
Parp14	1.16123e-16	0.668769	0.498	0.267	2.49375e-12
Jak2	2.18542e-16	0.411783	0.385	0.172	4.6932e-12
Irf8	2.47985e-16	0.684409	0.329	0.141	5.32548e-12
Nfe2l2	2.71322e-16	0.882517	0.732	0.554	5.82665e-12
Egr1	2.73579e-16	0.794359	0.854	0.653	5.87511e-12
Rabgef1	3.95617e-16	0.52805	0.399	0.19	8.49588e-12
Bhlhe40	7.48994e-16	0.772925	0.531	0.292	1.60846e-11
Clic4	8.1408e-16	0.797379	0.939	0.859	1.74824e-11
Lpl	1.50745e-15	0.742173	0.718	0.485	3.23724e-11
H3f3b	2.96982e-15	0.626382	0.958	0.948	6.37769e-11
Bag3	2.98778e-15	0.727207	0.671	0.451	6.41626e-11
Casp4	3.57636e-15	0.559944	0.3	0.122	7.68024e-11
Nfkbiz	3.71255e-15	0.823485	0.606	0.378	7.97269e-11
Pdlim4	3.822e-15	0.552951	0.277	0.108	8.20774e-11
Ptma	5.69471e-15	0.371086	0.948	0.952	1.22294e-10
Pcna	1.70362e-14	0.682765	0.596	0.397	3.65852e-10
Mgat4a	1.98704e-14	0.774884	0.399	0.198	4.26716e-10
Rapgef1	2.4582e-14	0.623871	0.624	0.444	5.27899e-10
1300014I06Rik	2.46145e-14	0.664174	0.559	0.338	5.28596e-10
Slfn5	3.60729e-14	0.854084	0.859	0.735	7.74666e-10
Akap12	3.64784e-14	1.34549	0.681	0.587	7.83373e-10
1190002H23Rik	3.88816e-14	0.620592	0.831	0.658	8.34982e-10
Col4a1	5.97408e-14	0.611992	0.864	0.784	1.28293e-09
Rlim	6.53158e-14	0.682556	0.629	0.406	1.40266e-09
Gem	8.5801e-14	1.12853	0.352	0.174	1.84258e-09
S100a10	1.02847e-13	0.626275	0.784	0.689	2.20863e-09
Cebpb	1.10872e-13	0.83795	0.545	0.342	2.38099e-09
Myc	1.4243e-13	0.687807	0.272	0.114	3.05869e-09
Rnf122	1.62529e-13	0.483819	0.333	0.153	3.49031e-09
Mapk6	1.98011e-13	0.451872	0.352	0.168	4.25229e-09
Coq10b	2.85481e-13	0.637502	0.441	0.239	6.13071e-09
Mcl1	3.24701e-13	0.625497	0.803	0.673	6.97296e-09
Ripk1	3.3596e-13	0.502254	0.441	0.244	7.21474e-09
Ppp1r2	6.82077e-13	0.502475	0.854	0.745	1.46476e-08
Ripk3	1.11393e-12	0.705341	0.258	0.105	2.39216e-08
Cnnm4	1.2401e-12	0.857478	0.315	0.155	2.66312e-08
Adamts1	1.33056e-12	1.04407	0.709	0.573	2.85737e-08
Osmr	1.35488e-12	0.642694	0.638	0.425	2.90961e-08
Pfkp	1.87217e-12	0.521948	0.451	0.247	4.02048e-08
Klf10	1.92865e-12	0.46544	0.587	0.362	4.14177e-08
Sox17	2.23063e-12	0.917258	0.662	0.513	4.79027e-08
Hsph1	2.42973e-12	1.02392	0.319	0.152	5.21785e-08
Igfbp7	2.62924e-12	0.385818	0.934	0.855	5.64629e-08
Tifa	2.68136e-12	0.330968	0.254	0.104	5.75822e-08
Gramd1a	3.36445e-12	0.463344	0.31	0.14	7.22516e-08
Nus1	4.23948e-12	0.72937	0.474	0.283	9.10429e-08
Nufip2	7.21309e-12	0.716508	0.676	0.547	1.54901e-07
Ddx3x	9.45982e-12	0.651206	0.789	0.652	2.0315e-07
Hmox1	9.98569e-12	1.11131	0.319	0.158	2.14443e-07
Fam38a	1.21003e-11	0.416967	0.455	0.273	2.59853e-07
Stat3	3.12507e-11	0.725572	0.643	0.504	6.71109e-07
Adh1	3.37644e-11	0.675878	0.469	0.274	7.25091e-07
Cish	3.65626e-11	0.849333	0.376	0.21	7.85181e-07
Nup62	4.47452e-11	0.761557	0.268	0.124	9.60904e-07
Pnrc1	4.50605e-11	0.780173	0.723	0.626	9.67675e-07
Azin1	5.25835e-11	0.340129	0.521	0.316	1.12923e-06
Jund	5.28984e-11	0.653842	0.911	0.816	1.13599e-06
Slc38a2	6.04325e-11	0.677531	0.662	0.498	1.29779e-06
Nfil3	7.38721e-11	0.52444	0.268	0.121	1.5864e-06
Slc39a1	7.4305e-11	0.344571	0.85	0.779	1.5957e-06
Fbxo30	8.94514e-11	0.546329	0.268	0.121	1.92097e-06
Eif1a	9.06056e-11	0.650633	0.488	0.316	1.94576e-06
Myadm	9.58831e-11	0.63971	0.822	0.671	2.05909e-06
Trim25	1.40606e-10	1.01665	0.498	0.367	3.01951e-06
Rhbdf2	1.58475e-10	0.316402	0.305	0.145	3.40325e-06
Itga5	1.74362e-10	0.51605	0.441	0.264	3.74442e-06
Zfp948	2.261e-10	0.298333	0.315	0.158	4.85549e-06
Cxcl9	2.59371e-10	0.785207	0.268	0.125	5.56998e-06
Cdc42ep3	2.66051e-10	0.765899	0.61	0.474	5.71344e-06
Bcr	2.80064e-10	0.83829	0.296	0.15	6.01437e-06
Brd2	2.80471e-10	0.728915	0.638	0.502	6.02311e-06
Mir24-2	3.1983e-10	0.336373	0.469	0.304	6.86836e-06
Rassf1	4.13463e-10	0.699373	0.601	0.444	8.87911e-06
Gch1	4.82596e-10	0.744953	0.465	0.331	1.03638e-05
Dnaja1	5.68658e-10	0.583919	0.84	0.765	1.22119e-05
Pcf11	6.12953e-10	0.404472	0.465	0.299	1.31632e-05
Cebpd	9.37296e-10	0.569594	0.714	0.557	2.01284e-05
Tgtp2	1.10952e-09	0.535948	0.587	0.416	2.38268e-05
Grrp1	1.20409e-09	0.714498	0.498	0.359	2.58578e-05
Gpr56	1.42124e-09	0.468948	0.709	0.552	3.05212e-05
Eif4a1	1.5312e-09	0.380444	0.822	0.69	3.28826e-05
Elf1	1.6735e-09	0.53945	0.653	0.486	3.59384e-05
Fam176a	1.7811e-09	0.814237	0.258	0.128	3.8249e-05
Cdkn2d	2.91248e-09	0.691865	0.291	0.158	6.25455e-05
Sqstm1	3.6329e-09	0.670173	0.812	0.793	7.80166e-05
Zbtb16	3.7821e-09	0.411993	0.296	0.151	8.12207e-05
Lrrc32	4.797e-09	0.687321	0.432	0.27	0.000103016
Sik1	4.93612e-09	0.275838	0.793	0.598	0.000106003
Tgif1	5.69673e-09	0.532716	0.263	0.133	0.000122337
Slc1a1	9.83496e-09	0.325271	0.338	0.179	0.000211206
Btg2	1.05193e-08	0.639188	0.901	0.845	0.000225901
Gm1821	1.19098e-08	0.296471	0.972	0.981	0.000255762
Lama4	1.26938e-08	0.492747	0.512	0.331	0.0002726
Ppp1r18	1.37362e-08	0.287906	0.423	0.264	0.000294984
B2m	1.61078e-08	0.258849	0.995	0.992	0.000345915
Vcl	1.71047e-08	0.568201	0.559	0.422	0.000367324
Timp3	1.74105e-08	0.340531	0.93	0.841	0.00037389
Hsp90ab1	1.81803e-08	0.32129	0.962	0.974	0.000390422
Col4a2	2.28075e-08	0.578371	0.798	0.736	0.000489791
Zfp36l1	4.63625e-08	0.376562	0.873	0.861	0.000995635
Map2k3	6.55348e-08	0.533147	0.479	0.328	0.00140736
Sntb2	7.59411e-08	0.398342	0.371	0.218	0.00163083
Timeless	8.23552e-08	0.458928	0.282	0.153	0.00176858
Stat2	8.61872e-08	0.382082	0.404	0.255	0.00185087
Dgkh	8.62013e-08	0.28585	0.338	0.194	0.00185117
Mafk	8.62451e-08	0.464423	0.484	0.316	0.00185211
Map3k8	9.50905e-08	0.259276	0.286	0.15	0.00204207
Rell1	1.08898e-07	0.365552	0.488	0.328	0.00233859
Skil	1.28807e-07	0.542655	0.62	0.527	0.00276613
Picalm	1.51045e-07	0.452688	0.676	0.56	0.0032437
Prr13	2.09721e-07	0.4467	0.634	0.536	0.00450377
Jmjd1c	2.20782e-07	0.718942	0.455	0.325	0.00474129
Ahnak	3.0431e-07	0.306043	0.967	0.896	0.00653505
Car8	3.26729e-07	0.257849	0.441	0.27	0.00701651
Sf3b1	3.34426e-07	0.561761	0.676	0.573	0.0071818
Flnb	3.68128e-07	0.590848	0.587	0.451	0.00790555
Igtp	4.45646e-07	0.437926	0.465	0.308	0.00957025
Mast4	4.76362e-07	0.405384	0.446	0.309	0.0102299
Zbtb11	4.88326e-07	0.284809	0.286	0.161	0.0104868
Nfat5	6.59107e-07	0.336326	0.441	0.302	0.0141543
Nras	6.6037e-07	0.507438	0.718	0.652	0.0141814
Krt14	8.07822e-07	0.421123	0.347	0.218	0.017348
Zswim4	1.00132e-06	0.3855	0.268	0.149	0.0215034
Arid5b	1.40636e-06	0.452179	0.61	0.51	0.0302017
Ubb	1.45564e-06	0.319115	0.991	0.99	0.0312599
Rasgrf2	1.58643e-06	0.346246	0.254	0.14	0.0340685
Spry4	1.89405e-06	0.446024	0.408	0.268	0.0406747
Ube2d3	1.92617e-06	0.501096	0.779	0.717	0.0413645
Klf9	1.9501e-06	0.406929	0.718	0.688	0.0418784
Tob1	2.27438e-06	0.362049	0.554	0.388	0.0488424
Cxcr7	2.60667e-06	0.454002	0.587	0.421	0.0559783
Ppa1	3.0066e-06	0.409777	0.291	0.17	0.0645668
Prnp	3.54778e-06	0.530259	0.521	0.391	0.0761885
BC006779	7.59612e-06	0.623307	0.3	0.189	0.163127
1810011O10Rik	7.93069e-06	0.469039	0.695	0.606	0.170312
Rcan1	8.58429e-06	0.830862	0.343	0.234	0.184348
Mat2a	9.30513e-06	0.566058	0.685	0.615	0.199828
Tagln2	1.01057e-05	0.387922	0.836	0.877	0.21702
Tgoln1	1.04009e-05	0.690831	0.554	0.479	0.22336
Errfi1	1.11597e-05	0.272136	0.376	0.257	0.239654
Rap1b	1.17727e-05	0.365695	0.775	0.733	0.252819
Herc6	1.39471e-05	0.334763	0.3	0.185	0.299514
Plxna2	1.40468e-05	0.391596	0.493	0.376	0.301656
Csf1	1.46462e-05	0.39292	0.296	0.184	0.314526
Apobec3	1.68476e-05	0.342974	0.385	0.269	0.361802
Tuba4a	1.77074e-05	0.440464	0.282	0.176	0.380267
Gapdh	1.96374e-05	0.326206	0.897	0.872	0.421713
Socs2	2.367e-05	0.577215	0.399	0.29	0.508313
Nos3	2.6948e-05	0.324115	0.606	0.484	0.578708
Slc25a5	2.88647e-05	0.522169	0.817	0.781	0.61987
Tgm2	2.97262e-05	0.454028	0.742	0.691	0.63837
Plec	3.03897e-05	0.518538	0.653	0.624	0.652618
Jam2	3.12417e-05	0.327688	0.779	0.711	0.670915
Lrrc8c	3.26562e-05	0.421638	0.531	0.414	0.701292
N4bp1	3.95874e-05	0.250107	0.324	0.213	0.850139
Id1	4.35556e-05	0.51876	0.732	0.715	0.935356
Ano6	4.5989e-05	0.263838	0.592	0.463	0.987613
Papss2	4.93203e-05	0.51749	0.352	0.239	1
Ier2	4.96139e-05	0.307891	0.84	0.793	1
4933407C03Rik	5.40519e-05	0.486009	0.54	0.42	1
Nr4a2	5.7216e-05	0.348435	0.3	0.195	1
Spag9	5.86012e-05	0.319776	0.653	0.562	1
Il4ra	6.565e-05	0.468718	0.408	0.291	1
Ddx5	8.81544e-05	0.355387	0.892	0.851	1
1810013L24Rik	0.000124614	0.392535	0.366	0.262	1
Arl13b	0.000133366	0.429736	0.263	0.172	1
Gcnt2	0.000137143	0.534581	0.31	0.213	1
Tceb1	0.000142992	0.353848	0.502	0.432	1
Ldha	0.000146593	0.448771	0.822	0.809	1
Kdm1a	0.000149134	0.377474	0.376	0.286	1
Kitl	0.000165936	0.426619	0.704	0.634	1
Luzp1	0.000191288	0.385227	0.653	0.59	1
Itga6	0.000191598	0.448503	0.62	0.535	1
Map3k6	0.00021898	0.369558	0.296	0.204	1
Chka	0.000230382	0.354654	0.268	0.178	1
Mt2	0.000299658	0.815059	0.376	0.286	1
Klf7	0.00030108	0.449873	0.563	0.49	1
Trib1	0.000305012	0.416566	0.282	0.196	1
Nop56	0.000348927	0.380611	0.319	0.227	1
Dusp8	0.000357975	0.380058	0.324	0.22	1
Cd93	0.000382833	0.26477	0.822	0.825	1
Srsf7	0.000394836	0.492664	0.446	0.368	1
Fam70b	0.000429226	0.385448	0.291	0.198	1
Itpripl1	0.000455141	0.621803	0.498	0.456	1
Ehd1	0.000495359	0.278535	0.596	0.504	1
Dennd5b	0.000552684	0.385145	0.545	0.448	1
Klf3	0.00056606	0.533373	0.521	0.445	1
Rsrc2	0.00060797	0.323424	0.592	0.511	1
Rhoc	0.000611708	0.352401	0.643	0.634	1
Gna13	0.000662967	0.324715	0.324	0.234	1
Pqlc1	0.000702246	0.51968	0.329	0.242	1
Arf4	0.000711988	0.468955	0.718	0.637	1
Ccnt1	0.000767603	0.2782	0.366	0.267	1
Rbm18	0.000797966	0.292106	0.347	0.244	1
Pdlim7	0.000907773	0.292197	0.408	0.312	1
Dst	0.000909215	0.337371	0.606	0.536	1
Ppp1r10	0.00096255	0.478431	0.385	0.31	1
Gnl2	0.000971471	0.349881	0.272	0.192	1
Spty2d1	0.00105339	0.255406	0.286	0.199	1
Ppp1cc	0.0012049	0.309173	0.427	0.352	1
Tap1	0.0013189	0.394828	0.357	0.275	1
Fam43a	0.00134961	0.450366	0.507	0.409	1
Jun	0.00139575	0.387011	0.906	0.866	1
Calm2	0.00139684	0.303864	0.873	0.884	1
H2afz	0.00144135	0.336826	0.592	0.592	1
Gnai3	0.00146384	0.41336	0.427	0.339	1
Cd9	0.00147152	0.300315	0.779	0.708	1
Tspan6	0.00149724	0.461649	0.333	0.257	1
Plcb4	0.00179129	0.429637	0.46	0.375	1
Tob2	0.00189052	0.266075	0.408	0.33	1
Swap70	0.00199965	0.378199	0.366	0.277	1
Trip10	0.00208969	0.381423	0.357	0.272	1
Srsf10	0.00234192	0.380066	0.469	0.414	1
Arl5b	0.00249537	0.31633	0.343	0.272	1
Uap1	0.00253726	1.04076	0.39	0.32	1
Akap2	0.00272582	0.370622	0.826	0.775	1
Pmp22	0.00274709	0.411303	0.554	0.479	1
Dnajb6	0.00285017	0.252476	0.526	0.451	1
Nhp2l1	0.00315137	0.338172	0.582	0.537	1
Tubb2a	0.00324418	0.430121	0.559	0.536	1
Esyt1	0.00329161	0.286138	0.352	0.273	1
Wnk1	0.00365054	0.377888	0.648	0.58	1
Taf7	0.00442538	0.347257	0.333	0.261	1
Irf7	0.00468014	0.418065	0.319	0.245	1
Odc1	0.0050501	0.285011	0.277	0.208	1
Chd4	0.00539943	0.271551	0.441	0.37	1
Dennd3	0.00549752	0.391964	0.371	0.297	1
Jak1	0.00619081	0.263489	0.662	0.607	1
Cdc42ep4	0.00635223	0.298202	0.39	0.313	1
Cyr61	0.00651586	0.293028	0.624	0.531	1
Pdlim5	0.00655989	0.546726	0.451	0.399	1
Ifi47	0.00684558	0.551491	0.305	0.244	1
Tubb4b	0.00710707	0.413504	0.695	0.712	1
Anxa2	0.00722069	0.28639	0.854	0.828	1
Gabarap	0.0073452	0.270067	0.737	0.747	1
Zc3h11a	0.0079179	0.306403	0.507	0.441	1
Socs5	0.00924697	0.325642	0.319	0.254	1
Eif5	0.0103528	0.291826	0.615	0.576	1
Hspg2	0.0125592	0.351332	0.559	0.5	1
Bcl10	0.013422	0.287657	0.418	0.345	1
Myo10	0.0140698	0.289968	0.615	0.553	1
Crk	0.0147346	0.385367	0.502	0.443	1
Lmo7	0.0150528	0.342208	0.319	0.263	1
Klf4	0.0151902	0.378385	0.784	0.743	1
Rtp4	0.0166682	0.275541	0.432	0.37	1
Eml1	0.0177527	0.705166	0.329	0.278	1
Magi1	0.0226726	0.284153	0.305	0.26	1
Kcnq1ot1	0.0292603	0.393449	0.376	0.326	1
Oat	0.0293301	0.256057	0.413	0.351	1
Nedd9	0.0303879	0.359544	0.413	0.364	1
Morf4l2	0.0316299	0.459552	0.559	0.534	1
Prex2	0.0330438	0.291548	0.606	0.599	1
Csnk1a1	0.033538	0.278592	0.606	0.587	1
Grasp	0.034268	0.287727	0.418	0.379	1
Cdh5	0.0354293	0.26649	0.897	0.903	1
Sox7	0.0356485	0.366601	0.587	0.533	1
Rhoj	0.0360665	0.292017	0.629	0.592	1
Clic1	0.0368387	0.299003	0.756	0.777	1
Tmed5	0.042174	0.324917	0.488	0.478	1
Lamb2	0.044586	0.300709	0.319	0.425	1
Tsc22d2	0.0460866	0.301926	0.315	0.265	1
2900026A02Rik	0.0475763	0.33695	0.249	0.339	1
H2afy	0.0490883	0.287363	0.535	0.508	1
Mbnl1	0.0514258	0.289199	0.601	0.594	1
Tmem33	0.0577812	0.39101	0.357	0.316	1
Scarb1	0.0610885	0.28319	0.629	0.58	1
Filip1l	0.0646635	0.294139	0.357	0.315	1
Gbp2	0.0700977	0.398321	0.437	0.395	1
Notch1	0.0709854	0.263659	0.761	0.731	1
Krt15	0.0745694	0.719087	0.31	0.264	1
Impdh2	0.0765383	0.435016	0.305	0.28	1
Ralb	0.0797591	0.285278	0.498	0.492	1
Tor1aip2	0.0815451	0.292273	0.385	0.345	1
Ypel5	0.0836265	0.252511	0.423	0.382	1
Tmod3	0.083935	0.276769	0.653	0.636	1
Fmo2	0.100374	0.253691	0.3	0.264	1
Lmcd1	0.103821	0.382601	0.347	0.321	1
Igf2r	0.12649	0.279912	0.347	0.32	1
Mt1	0.134299	0.881307	0.469	0.456	1
Eif6	0.137725	0.388832	0.432	0.423	1
Sod2	0.145497	0.276497	0.399	0.377	1
Sdc4	0.151216	0.777888	0.432	0.404	1
Hnrnpab	0.157826	0.252099	0.69	0.721	1
Acox1	0.179082	0.266626	0.31	0.288	1
Sar1a	0.179664	0.266764	0.521	0.494	1
Lima1	0.186661	0.447168	0.385	0.377	1
Hspe1	0.204381	0.26427	0.272	0.353	1
Rai12	0.215555	0.253178	0.268	0.245	1
Pnrc2	0.219085	0.273602	0.432	0.417	1
Whsc1l1	0.219957	0.298486	0.465	0.466	1
Clu	0.221354	0.475483	0.324	0.363	1
Pabpc1	0.232159	0.297384	0.568	0.578	1
Rsad2	0.233737	0.26456	0.366	0.345	1
Ckap4	0.244846	0.326076	0.31	0.286	1
Jmjd6	0.270109	0.317217	0.286	0.267	1
Mtap1b	0.2799	0.290253	0.263	0.241	1
Rapgef4	0.29767	0.278447	0.343	0.403	1
Spry1	0.317375	0.281267	0.343	0.34	1
Atxn1	0.32879	0.396728	0.399	0.395	1
Ceacam1	0.339987	0.286584	0.516	0.554	1
Wwtr1	0.368736	0.354395	0.479	0.485	1
Pkp4	0.424411	0.290392	0.371	0.38	1
Tm4sf1	0.456183	0.264957	0.831	0.878	1
Mllt4	0.503013	0.252817	0.573	0.673	1
2010106G01Rik	0.503233	0.260071	0.427	0.5	1
Syne2	0.555234	0.256751	0.39	0.38	1
Polr2l	0.575932	0.255332	0.371	0.41	1
Rtn4	0.579021	0.267265	0.451	0.461	1
Arl6ip1	0.586676	0.289213	0.601	0.615	1
Itpkb	0.588953	0.25272	0.305	0.346	1
Sdf2	0.5943	0.279533	0.352	0.366	1
Cebpg	0.594621	0.289654	0.446	0.46	1
Kbtbd2	0.614124	0.284276	0.3	0.302	1
Fas	0.663621	0.344926	0.437	0.476	1
Slk	0.733112	0.332075	0.357	0.362	1
Gpr146	0.765041	0.418907	0.432	0.458	1
Rnf19a	0.817686	0.286225	0.249	0.257	1
Tmx3	0.871763	0.317191	0.249	0.266	1
Neat1	0.973606	0.332679	0.371	0.399	1

## Sheet: Pancreas
	p_val	avg_logFC	pct.1	pct.2	p_val_adj
Reg1	2.77809e-268	1.3813	0.531	0.005	5.96595e-264
Rnase1	2.83934e-258	2.17744	0.735	0.014	6.09749e-254
Try5	1.17736e-249	1.96219	0.673	0.012	2.52837e-245
Clps	2.23085e-245	2.30898	0.714	0.014	4.79076e-241
Cela3b	1.7928e-243	2.45458	0.633	0.01	3.85005e-239
2210010C04Rik	5.78605e-234	2.35073	0.694	0.014	1.24255e-229
Ctrl	7.36694e-212	1.7493	0.592	0.011	1.58205e-207
Sycn	2.86976e-193	1.49609	0.673	0.018	6.16281e-189
Cpb1	2.16455e-191	2.23757	0.551	0.011	4.64838e-187
Cpa2	9.8037e-186	1.2254	0.408	0.005	2.10535e-181
Try4	3.58896e-183	2.87494	0.694	0.02	7.70729e-179
Prss2	4.18476e-178	3.21802	0.735	0.024	8.98678e-174
Pnlip	4.7457e-166	2.99405	0.714	0.025	1.01914e-161
Pnliprp1	4.8662e-159	1.74152	0.51	0.012	1.04502e-154
Cpa1	1.99251e-154	2.3232	0.612	0.019	4.27893e-150
Ctrb1	3.48303e-146	3.06456	0.714	0.03	7.4798e-142
Cela1	6.06647e-128	3.45005	0.755	0.04	1.30277e-123
Cela2a	9.09136e-118	3.79463	0.694	0.037	1.95237e-113
Nkx2-3	2.1787e-107	0.514781	0.367	0.009	4.67876e-103
Cel	3.74175e-107	2.44526	0.49	0.018	8.0354e-103
Zg16	7.7677e-105	1.88528	0.796	0.057	1.66811e-100
Bdkrb2	5.80723e-74	0.347704	0.347	0.013	1.2471e-69
Col13a1	6.98356e-70	0.913794	0.714	0.063	1.49972e-65
Fut4	6.96658e-61	0.776512	0.306	0.012	1.49607e-56
Lama3	2.19026e-50	0.713926	0.612	0.065	4.70358e-46
Rhbdl2	8.39794e-45	0.35673	0.327	0.02	1.80346e-40
Klk1	4.12743e-34	1.00458	0.469	0.058	8.86365e-30
Plvap	2.17865e-31	1.66759	0.98	0.354	4.67866e-27
Ces2e	4.65397e-31	1.25206	0.531	0.078	9.99441e-27
Kcnk5	2.9459e-29	0.637337	0.265	0.021	6.32633e-25
Igfbp3	1.85122e-28	1.82495	0.878	0.26	3.9755e-24
Fam38b	3.04465e-28	0.64524	0.571	0.097	6.53838e-24
Thbs1	1.33587e-27	1.07333	0.49	0.077	2.86878e-23
Esm1	2.06089e-27	1.83776	0.469	0.069	4.42576e-23
Chst2	9.5321e-27	0.981463	0.633	0.128	2.04702e-22
Prss23	3.47427e-26	1.09263	0.898	0.271	7.461e-22
Col15a1	4.55854e-25	0.530176	0.551	0.1	9.78946e-21
Pde4d	6.55187e-24	0.617239	0.469	0.08	1.40701e-19
Inhbb	3.79218e-23	0.583895	0.408	0.061	8.1437e-19
Jam3	5.68455e-23	1.1456	0.735	0.2	1.22076e-18
Ramp3	1.4226e-21	1.01036	0.673	0.17	3.05504e-17
Stc1	1.43075e-21	0.946054	0.571	0.119	3.07254e-17
Rai14	6.60743e-21	0.637947	0.673	0.168	1.41895e-16
Plscr2	9.52739e-21	0.897784	0.796	0.241	2.04601e-16
Upp1	2.95975e-20	0.617467	0.653	0.152	6.35607e-16
1200009I06Rik	1.72641e-19	0.355925	0.408	0.069	3.70746e-15
Fam167b	1.43258e-18	0.437292	0.571	0.124	3.07647e-14
Kctd12b	5.90021e-18	0.709787	0.633	0.171	1.26707e-13
Ins2	6.25121e-18	0.32637	0.714	0.225	1.34245e-13
Hoxd8	1.17277e-17	0.454952	0.367	0.062	2.51853e-13
Sntb2	3.65966e-17	0.634515	0.714	0.22	7.85913e-13
Cd24a	5.37709e-17	1.30821	0.735	0.256	1.15473e-12
Synpo	1.28086e-16	0.635775	0.571	0.151	2.75065e-12
Ppap2b	5.05341e-16	1.07956	1	0.703	1.08522e-11
Igfbp7	6.23582e-16	0.979434	0.98	0.857	1.33914e-11
Mtap6	2.59878e-15	0.463745	0.388	0.076	5.58088e-11
Thrsp	6.17651e-15	0.760185	0.796	0.288	1.3264e-10
Gpx8	6.51825e-15	0.571385	0.388	0.082	1.39979e-10
Tnfaip2	1.77058e-14	0.743985	0.469	0.116	3.80233e-10
Ints9	3.31231e-14	0.272173	0.551	0.148	7.11318e-10
Emcn	3.81412e-14	1.04513	1	0.761	8.19083e-10
Mcf2l	4.03512e-14	0.689753	0.857	0.371	8.66543e-10
Cyp26b1	1.46379e-13	0.431388	0.551	0.159	3.14348e-09
Lpcat1	1.4699e-13	0.646806	0.571	0.172	3.1566e-09
Hecw2	1.5535e-13	0.400022	0.653	0.212	3.33613e-09
Endod1	1.30897e-12	0.83522	0.551	0.184	2.81102e-08
Chst15	2.10632e-12	0.271665	0.51	0.138	4.52331e-08
Spred1	4.38889e-12	0.348621	0.367	0.086	9.42514e-08
Fam174b	5.08114e-12	0.638911	0.49	0.141	1.09118e-07
Ldb2	7.82932e-12	0.547538	0.816	0.377	1.68135e-07
Ehd4	8.69916e-12	0.652288	0.918	0.459	1.86814e-07
5430407P10Rik	1.27992e-11	0.445707	0.408	0.104	2.74863e-07
Rapgef4	1.32223e-11	0.626001	0.796	0.395	2.83949e-07
Alox12	1.45975e-11	0.281549	0.367	0.085	3.13482e-07
Emid1	1.58614e-11	0.330131	0.265	0.05	3.40623e-07
Ripply3	2.10502e-11	0.257932	0.714	0.256	4.52054e-07
Sorbs2	2.65955e-11	0.39813	0.755	0.287	5.71137e-07
Rbp7	3.02393e-11	0.263655	0.735	0.267	6.49388e-07
Tbxa2r	3.57697e-11	0.665752	0.51	0.155	7.68153e-07
Atp8b1	3.73106e-11	0.506281	0.388	0.103	8.01246e-07
Lrrc3b	4.34027e-11	0.462123	0.347	0.08	9.32073e-07
Vamp5	8.32214e-11	0.518023	0.837	0.404	1.78718e-06
Btnl9	1.17954e-10	0.532574	0.755	0.3	2.53307e-06
Fkbp5	1.39581e-10	0.295078	0.469	0.142	2.9975e-06
Ivns1abp	1.55451e-10	0.73097	0.714	0.34	3.33831e-06
Mfge8	2.37329e-10	0.844921	0.918	0.645	5.09663e-06
Heg1	2.61502e-10	0.843132	0.959	0.585	5.61576e-06
Ifi44	3.32018e-10	0.385042	0.612	0.226	7.1301e-06
Dysf	4.1204e-10	0.427138	0.653	0.266	8.84856e-06
Rdx	4.27982e-10	0.646515	0.959	0.661	9.19091e-06
Eml1	6.50174e-10	0.860847	0.653	0.276	1.39625e-05
Fam101b	6.5483e-10	0.549998	0.918	0.5	1.40625e-05
Fbln2	8.39236e-10	0.940949	0.673	0.319	1.80226e-05
Clec14a	1.0106e-09	0.481054	0.959	0.523	2.17026e-05
Entpd1	1.03947e-09	0.623242	0.776	0.39	2.23226e-05
Flt1	1.21964e-09	0.568262	1	0.85	2.61918e-05
Ntf3	1.29694e-09	0.351693	0.367	0.098	2.78517e-05
Hspg2	1.87087e-09	0.348746	0.918	0.498	4.01769e-05
Kdr	1.91944e-09	0.815983	0.959	0.755	4.12201e-05
Tspan9	1.96836e-09	0.534397	0.898	0.518	4.22705e-05
Crispld1	2.54666e-09	0.402843	0.388	0.113	5.46896e-05
Mid2	2.95385e-09	0.36183	0.388	0.115	6.34339e-05
Id4	3.10671e-09	0.252277	0.286	0.068	6.67167e-05
Ednrb	3.41663e-09	0.411919	0.816	0.377	7.3372e-05
Bhlhe40	3.83075e-09	0.335503	0.694	0.299	8.22654e-05
Slc43a3	4.39836e-09	0.740048	0.959	0.631	9.44548e-05
Slc12a7	4.52209e-09	0.45599	0.469	0.157	9.71119e-05
Pitpnm2	6.24976e-09	0.547398	0.571	0.218	0.000134214
Polr2b	6.57607e-09	0.351926	0.653	0.282	0.000141221
Abcg1	6.59039e-09	0.274068	0.776	0.35	0.000141529
Ephb4	7.40337e-09	0.363851	0.816	0.385	0.000158987
Fmo2	8.12764e-09	0.546988	0.612	0.262	0.000174541
Card10	8.145e-09	0.411328	0.633	0.269	0.000174914
Prdx4	9.95285e-09	0.262442	0.694	0.278	0.000213737
Notch4	1.0704e-08	0.47303	0.755	0.355	0.000229869
Sox13	1.12906e-08	0.558565	0.653	0.285	0.000242466
Col4a1	1.21451e-08	0.871159	0.959	0.786	0.000260816
Fam114a1	1.33445e-08	0.281397	0.449	0.151	0.000286574
Ptgs1	1.36209e-08	0.52461	0.592	0.248	0.00029251
Prpf40b	1.54122e-08	0.271868	0.347	0.101	0.000330977
Scarb1	1.63094e-08	0.900934	0.878	0.579	0.000350244
Eml3	1.86161e-08	0.405751	0.49	0.178	0.000399781
B3gnt2	1.96852e-08	0.513559	0.735	0.368	0.00042274
Snai2	2.34194e-08	0.361207	0.388	0.121	0.000502933
Fbxo7	2.54707e-08	0.326066	0.469	0.164	0.000546984
Meox1	3.0049e-08	0.414001	0.49	0.177	0.000645302
Spry4	3.34383e-08	0.278252	0.633	0.271	0.000718087
4933407C03Rik	3.41786e-08	0.386256	0.816	0.422	0.000733985
Prdm1	3.47365e-08	0.303976	0.306	0.084	0.000745966
Rapgef3	3.59437e-08	0.364188	0.755	0.349	0.000771891
Mcam	3.60376e-08	0.418651	0.714	0.318	0.000773908
Mtx2	3.64469e-08	0.276677	0.469	0.164	0.000782697
Crim1	3.65343e-08	0.365616	0.857	0.48	0.000784573
Lepr	4.75505e-08	0.333826	0.306	0.086	0.00102115
6430548M08Rik	4.84531e-08	0.272071	0.429	0.148	0.00104053
Lipe	4.96023e-08	0.251561	0.776	0.355	0.00106521
Ppap2a	5.28425e-08	0.980313	0.878	0.667	0.00113479
B4galt4	5.84252e-08	0.462269	0.735	0.354	0.00125468
St3gal5	9.19493e-08	0.305093	0.469	0.173	0.00197461
Nid2	1.16065e-07	0.350366	0.347	0.106	0.0024925
Golm1	1.16458e-07	0.520346	0.449	0.178	0.00250094
Mef2c	1.25379e-07	0.417836	0.816	0.455	0.00269251
Pcdh17	1.30381e-07	0.258122	0.653	0.309	0.00279993
Syvn1	1.43355e-07	0.299906	0.612	0.252	0.00307855
Ckap4	1.43845e-07	0.390866	0.612	0.284	0.00308908
Stom	1.68877e-07	0.622164	0.612	0.298	0.00362664
Robo4	1.99958e-07	0.422788	0.918	0.577	0.0042941
Lats2	2.01578e-07	0.40242	0.878	0.508	0.00432888
Tmem176a	2.30715e-07	0.263614	0.714	0.338	0.00495461
Sipa1l2	2.37087e-07	0.27659	0.388	0.133	0.00509144
Gas6	3.07003e-07	0.478675	0.878	0.572	0.00659289
Slc44a1	4.73219e-07	0.338001	0.429	0.156	0.0101624
Fzd4	4.93212e-07	0.440905	0.776	0.42	0.0105917
Sos1	6.42868e-07	0.301354	0.51	0.216	0.0138056
Lars2	6.63294e-07	0.810283	1	0.898	0.0142442
Spry1	6.64997e-07	0.31218	0.673	0.336	0.0142808
Flcn	6.87051e-07	0.280825	0.388	0.137	0.0147544
Nid1	7.04873e-07	0.429293	0.735	0.397	0.0151372
AW112010	7.40614e-07	0.348078	0.898	0.529	0.0159047
Nedd9	7.91853e-07	0.390908	0.714	0.362	0.017005
Plcb1	9.45072e-07	0.546511	0.551	0.257	0.0202954
Scamp4	1.00897e-06	0.294435	0.531	0.225	0.0216677
Tnfrsf1b	1.03277e-06	0.344387	0.327	0.111	0.0221787
Phc2	1.05475e-06	0.3946	0.714	0.371	0.0226508
Ptprr	1.05694e-06	0.293898	0.469	0.179	0.0226978
Cd200	1.08354e-06	0.373593	0.98	0.774	0.0232689
Amotl1	1.08401e-06	0.315391	0.816	0.449	0.0232791
Myo18a	1.14134e-06	0.300175	0.571	0.276	0.0245103
Tnfaip1	1.21271e-06	0.355663	0.959	0.633	0.026043
Zhx3	1.41475e-06	0.3823	0.51	0.221	0.0303818
Col4a2	1.4619e-06	0.650772	0.898	0.737	0.0313944
Fez2	1.62286e-06	0.358593	0.796	0.443	0.0348509
Lrrc8d	1.63016e-06	0.413015	0.327	0.114	0.0350078
Slc23a2	1.71686e-06	0.25862	0.306	0.101	0.0368696
Gdap2	1.81265e-06	0.432392	0.347	0.12	0.0389266
Oaz2	1.84734e-06	0.547852	0.918	0.599	0.0396717
Caskin2	1.88696e-06	0.397894	0.735	0.426	0.0405226
Nrp1	1.98726e-06	0.492158	1	0.863	0.0426763
Ptpn14	1.99666e-06	0.262682	0.531	0.233	0.0428782
Ptk2	2.6289e-06	0.268543	0.633	0.294	0.0564555
Exoc3l	2.90964e-06	0.272986	0.327	0.109	0.0624846
Nudt4	2.99099e-06	0.430616	0.612	0.315	0.0642315
Ncoa7	3.67603e-06	0.296125	0.408	0.161	0.0789427
Prkcdbp	3.80107e-06	0.410999	0.918	0.575	0.081628
Zfp143	4.22726e-06	0.278207	0.265	0.081	0.0907804
Sox4	4.29036e-06	0.290704	0.49	0.225	0.0921355
Ceacam1	4.43823e-06	0.534032	0.857	0.549	0.095311
Lmcd1	4.49561e-06	0.315178	0.653	0.319	0.0965431
Cd300lg	4.51381e-06	0.293976	0.959	0.598	0.0969341
Ltbp4	5.69929e-06	0.666164	0.939	0.746	0.122392
Sel1l	6.28501e-06	0.315933	0.571	0.278	0.13497
Gbp9	6.30335e-06	0.297446	0.551	0.264	0.135364
Itga1	6.5796e-06	0.342148	0.837	0.556	0.141297
Dab2	6.68828e-06	0.293082	0.592	0.292	0.143631
Lamc1	6.84713e-06	0.420971	0.571	0.266	0.147042
Inpp5d	7.20857e-06	0.264573	0.408	0.178	0.154804
Tmem88	7.64579e-06	0.258749	0.98	0.713	0.164193
Agpat2	7.66874e-06	0.300553	0.469	0.2	0.164686
Srprb	7.97331e-06	0.2568	0.49	0.21	0.171227
Plxna2	8.12631e-06	0.267446	0.714	0.378	0.174512
Grn	8.67015e-06	0.331329	0.939	0.685	0.186191
Tmem185b	1.00439e-05	0.314691	0.408	0.166	0.215693
Foxo1	1.11207e-05	0.290824	0.837	0.5	0.238817
Sdhd	1.26894e-05	0.264967	0.653	0.332	0.272506
Tspan15	1.2948e-05	0.438654	0.592	0.295	0.278058
Tnfsf10	1.39626e-05	0.492824	0.653	0.362	0.299847
Fgd5	1.42624e-05	0.274938	0.776	0.45	0.306286
Myo1c	1.47636e-05	0.427686	0.796	0.497	0.317049
Agtrap	1.50173e-05	0.265027	0.49	0.224	0.322497
Mgll	1.51187e-05	0.338798	1	0.721	0.324675
She	1.67753e-05	0.351725	0.612	0.334	0.36025
Pecam1	1.70353e-05	0.461387	1	0.906	0.365832
Ahr	1.87544e-05	0.26912	0.408	0.172	0.402751
Dock1	1.99245e-05	0.26849	0.735	0.412	0.427879
Nmd3	2.24333e-05	0.301767	0.347	0.14	0.481755
Ptprb	2.30756e-05	0.364753	0.98	0.842	0.495549
Prpf8	2.33202e-05	0.355749	0.592	0.308	0.500801
Tril	2.33595e-05	0.587407	0.367	0.154	0.501645
Ttc39b	2.50494e-05	0.256413	0.265	0.091	0.537937
Rbms1	2.54242e-05	0.321997	0.939	0.644	0.545984
Zdhhc7	2.6516e-05	0.281927	0.408	0.176	0.569432
Ank	2.73696e-05	0.273697	0.286	0.101	0.587762
Dlc1	2.98197e-05	0.274593	0.837	0.606	0.640377
Map3k5	3.45036e-05	0.352069	0.327	0.126	0.740965
Cog6	3.84085e-05	0.344732	0.286	0.104	0.824823
Fam129b	4.10853e-05	0.351906	0.592	0.311	0.882306
Ndst1	4.29473e-05	0.487401	0.367	0.15	0.922294
Zfp259	4.47869e-05	0.266169	0.367	0.153	0.961799
Srsf4	5.25302e-05	0.276232	0.51	0.255	1
Podxl	5.32759e-05	0.380331	0.918	0.688	1
Ep400	5.55694e-05	0.436898	0.571	0.315	1
Il6st	5.868e-05	0.352911	0.714	0.417	1
Nfe2l1	6.22256e-05	0.306905	0.755	0.483	1
Fam133b	6.41648e-05	0.397556	0.388	0.17	1
Adam15	6.51432e-05	0.328829	0.939	0.621	1
Edc3	6.77234e-05	0.431656	0.306	0.121	1
Mrpl55	6.87236e-05	0.26433	0.408	0.176	1
Cd34	6.92898e-05	0.390159	0.959	0.708	1
8430408G22Rik	7.43512e-05	0.328442	0.837	0.56	1
H2-T23	7.65013e-05	0.331494	0.98	0.765	1
Usp21	8.79086e-05	0.537587	0.408	0.183	1
Tsc22d1	9.05976e-05	0.454458	0.98	0.774	1
Spna2	9.22365e-05	0.258175	0.959	0.681	1
Hexa	9.2338e-05	0.520913	0.653	0.422	1
Mmrn2	9.56391e-05	0.311124	0.959	0.701	1
Tbc1d20	9.56915e-05	0.317201	0.388	0.184	1
Mbtps1	0.000100021	0.547324	0.367	0.174	1
Prkcsh	0.000116143	0.252102	0.429	0.199	1
Marveld1	0.00013322	0.288328	0.347	0.147	1
Cdan1	0.000136885	0.28426	0.388	0.175	1
Nck1	0.000149936	0.301383	0.653	0.388	1
Snrk	0.000149967	0.481204	0.939	0.783	1
Pdia4	0.000153445	0.258879	0.592	0.325	1
Hivep2	0.000161807	0.291207	0.429	0.212	1
Crbn	0.000166062	0.356203	0.367	0.167	1
Pfkfb3	0.000167114	0.316714	0.327	0.141	1
Tbc1d1	0.000179493	0.293339	0.327	0.139	1
Imp4	0.000180633	0.302551	0.388	0.178	1
Aco2	0.000182535	0.272747	0.673	0.409	1
Rnf215	0.000183513	0.581134	0.429	0.225	1
Tgfbr2	0.000189517	0.259205	0.796	0.503	1
Eng	0.000191203	0.292394	1	0.927	1
Nrip1	0.000200267	0.315963	0.367	0.16	1
Bcam	0.000207163	0.34497	0.98	0.722	1
Napa	0.000207193	0.250949	0.673	0.391	1
Fes	0.00021182	0.288314	0.367	0.165	1
Camk1	0.000241217	0.376587	0.612	0.357	1
Fas	0.000284696	0.361168	0.735	0.471	1
Plcg1	0.000285234	0.324866	0.592	0.35	1
Msn	0.000291753	0.280208	0.959	0.757	1
Rraga	0.000301366	0.29046	0.653	0.417	1
Tmem167b	0.000304836	0.321914	0.347	0.165	1
Gapdh	0.000315792	0.25045	0.98	0.872	1
Itm2b	0.000322277	0.254554	1	0.992	1
Pigy	0.00034991	0.27675	0.306	0.129	1
Rab12	0.000353951	0.320572	0.673	0.424	1
2310067B10Rik	0.000408446	0.286171	0.367	0.175	1
Cd81	0.00041194	0.284021	1	0.908	1
Aggf1	0.000435252	0.287355	0.469	0.259	1
Zufsp	0.000441097	0.25509	0.265	0.108	1
Zfp292	0.000470158	0.265504	0.408	0.207	1
Tubb4b	0.00048547	0.359001	0.939	0.709	1
Myo6	0.000487699	0.27661	0.653	0.417	1
Il10rb	0.000528555	0.297777	0.694	0.462	1
Fam38a	0.000540824	0.325001	0.51	0.279	1
Ddx41	0.000541421	0.325309	0.306	0.14	1
Rgp1	0.000545227	0.335107	0.449	0.222	1
Fam57a	0.00055329	0.521769	0.265	0.111	1
Atf7ip	0.000567126	0.435891	0.551	0.321	1
Slco2b1	0.000632996	0.460759	0.429	0.241	1
Spryd3	0.000652527	0.283843	0.306	0.137	1
1190002H23Rik	0.000657523	0.3139	0.918	0.664	1
Glt25d2	0.000659172	0.308569	0.306	0.135	1
Repin1	0.000663431	0.376251	0.265	0.111	1
Amfr	0.00070276	0.373556	0.551	0.341	1
Adar	0.000749504	0.278936	0.49	0.268	1
Phrf1	0.000749772	0.316949	0.306	0.142	1
Eif4g3	0.000784995	0.271962	0.592	0.374	1
Tom1l2	0.000848114	0.314103	0.408	0.22	1
Baz1b	0.00085608	0.252676	0.551	0.324	1
Cog4	0.000859722	0.299724	0.347	0.166	1
Eftud2	0.000860345	0.280761	0.449	0.238	1
Safb	0.000883132	0.254572	0.429	0.228	1
E030010A14Rik	0.000997258	0.254372	0.449	0.237	1
Pld3	0.00106441	0.457996	0.469	0.272	1
Ifi35	0.001083	0.351029	0.694	0.443	1
Pdcl	0.00118004	0.257149	0.388	0.195	1
Gne	0.00118659	0.335268	0.306	0.148	1
Itgb5	0.00131299	0.275285	0.429	0.24	1
Sfxn3	0.00144652	0.305591	0.449	0.25	1
Eif3i	0.00150816	0.268736	0.571	0.351	1
Nde1	0.00152278	0.281303	0.429	0.233	1
App	0.00167442	0.315906	1	0.9	1
Fbxo38	0.00172976	0.298663	0.367	0.192	1
Serinc3	0.00178634	0.264126	1	0.915	1
Adam17	0.001808	0.276198	0.449	0.252	1
Clic5	0.00181454	0.355151	0.755	0.531	1
Degs1	0.00193958	0.355725	0.735	0.538	1
Eif2b1	0.0021624	0.321987	0.306	0.142	1
Sparc	0.0025136	0.25012	1	0.959	1
Eif2b5	0.00274189	0.258838	0.408	0.218	1
Tanc1	0.0027428	0.361722	0.551	0.344	1
St6galnac2	0.00310151	0.256743	0.49	0.286	1
Rab43	0.00319039	0.285066	0.286	0.14	1
2510009E07Rik	0.00322839	0.26079	0.327	0.169	1
Socs5	0.00332745	0.350505	0.449	0.255	1
Slc3a2	0.00335805	0.295122	0.878	0.672	1
Vegfc	0.00343501	0.255266	0.265	0.124	1
Tmem204	0.00344888	0.290099	0.918	0.728	1
Slc25a12	0.00352393	0.545493	0.347	0.182	1
Lass5	0.00358189	0.370515	0.551	0.35	1
Jup	0.00373417	0.513962	0.918	0.841	1
Clta	0.0040148	0.259457	0.776	0.529	1
Ddx58	0.00406246	0.283418	0.408	0.247	1
Akt1	0.0040722	0.27131	0.633	0.418	1
Timp3	0.00437604	0.278933	0.959	0.844	1
Aars	0.00497237	0.334397	0.306	0.162	1
Zhx1	0.00570997	0.409867	0.429	0.278	1
Usp25	0.005877	0.39987	0.469	0.311	1
Fxr1	0.00589335	0.423208	0.429	0.259	1
Cep170	0.00595098	0.326226	0.306	0.165	1
Ccpg1	0.00605334	0.291742	0.49	0.308	1
Prps1	0.0070956	0.300708	0.286	0.149	1
Itga6	0.00770719	0.302156	0.735	0.537	1
Fam171a1	0.00800694	0.268088	0.449	0.272	1
Eef2	0.00810278	0.33897	0.959	0.84	1
Ppp1r12c	0.00879342	0.321117	0.469	0.313	1
Notch1	0.00915263	0.401652	0.939	0.73	1
Lipa	0.0110054	0.281618	0.612	0.401	1
Caprin1	0.0122756	0.400304	0.51	0.373	1
Eltd1	0.0139946	0.320975	0.918	0.784	1
Rcbtb1	0.0142285	0.302092	0.286	0.157	1
Gusb	0.0156667	0.268725	0.367	0.227	1
Cmtm6	0.0184166	0.289075	0.531	0.366	1
Plekha3	0.0223676	0.278863	0.347	0.221	1
Tmx2	0.0227192	0.255247	0.388	0.242	1
Ogdh	0.0233667	0.319866	0.673	0.478	1
Mpnd	0.0265325	0.281846	0.286	0.168	1
Gja4	0.02741	0.288418	0.347	0.211	1
Cct8	0.0328783	0.259836	0.612	0.482	1
Slc44a2	0.0359546	0.286239	0.51	0.348	1
Scarb2	0.0378206	0.32475	0.388	0.263	1
Dock6	0.0385099	0.483677	0.429	0.3	1
Hdac5	0.0416122	0.311176	0.327	0.207	1
Zfp871	0.0471151	0.260457	0.347	0.233	1
Rpa1	0.0471157	0.284302	0.265	0.166	1
P4hb	0.0612895	0.291275	0.959	0.793	1
Nr1d1	0.0785549	0.498609	0.347	0.26	1
Zfp281	0.0856356	0.281863	0.265	0.171	1
Sema7a	0.0915926	0.272611	0.51	0.387	1
Atrn	0.1046	0.281143	0.429	0.304	1
Aplnr	0.178267	0.325983	0.327	0.253	1
Fbln5	0.199945	0.641954	0.265	0.211	1

## Sheet: Trachea
	p_val	avg_logFC	pct.1	pct.2	p_val_adj
Nup210l	3.88352e-93	0.698761	0.649	0.082	8.33987e-89
Rnd1	1.0258e-85	1.76103	0.825	0.164	2.20291e-81
Fut2	2.62664e-75	0.506173	0.447	0.046	5.64071e-71
Adamts4	1.97567e-70	1.20356	0.535	0.074	4.24276e-66
Rel	1.23646e-68	0.599038	0.596	0.095	2.6553e-64
Tnfaip3	1.8481e-63	0.625072	0.509	0.073	3.96879e-59
Socs3	5.5469e-63	1.90994	0.921	0.356	1.1912e-58
Bhlhe40	2.09613e-61	1.84287	0.868	0.288	4.50143e-57
Rab20	7.89895e-58	0.747351	0.465	0.065	1.6963e-53
Prkcc	1.01427e-57	0.441433	0.404	0.048	2.17815e-53
Ccrn4l	9.3918e-57	1.24606	0.693	0.163	2.01689e-52
Sbno2	6.01984e-56	1.1223	0.851	0.261	1.29276e-51
Pfkfb3	1.11813e-54	1.16385	0.614	0.13	2.40119e-50
Pim1	4.11849e-54	0.349808	0.57	0.107	8.84446e-50
Pde12	2.89691e-53	1.01291	0.596	0.12	6.22111e-49
Snai1	5.39021e-53	0.604611	0.439	0.065	1.15755e-48
Csrnp1	2.20325e-52	1.39127	0.895	0.365	4.73147e-48
Tnfrsf10b	2.64576e-52	0.923858	0.833	0.26	5.68177e-48
Fosb	6.85049e-51	1.36175	0.912	0.356	1.47114e-46
Psd	2.20476e-50	0.31972	0.447	0.07	4.73471e-46
Gadd45b	2.13375e-49	0.946049	0.807	0.23	4.58222e-45
Trex1	2.20646e-49	1.3377	0.711	0.194	4.73838e-45
Sema4c	3.67656e-48	0.3968	0.632	0.153	7.89541e-44
Mapk6	1.07768e-46	0.997058	0.649	0.164	2.31431e-42
Ier3	5.93201e-46	1.5888	0.947	0.463	1.2739e-41
Bcl3	1.51604e-44	0.881607	0.702	0.184	3.25569e-40
Txnrd1	2.22414e-44	0.869883	0.737	0.224	4.77634e-40
Fosl2	2.69636e-43	1.08016	0.868	0.335	5.79044e-39
Tifa	2.95078e-43	0.573605	0.5	0.101	6.3368e-39
Socs1	2.05796e-42	0.415963	0.553	0.123	4.41948e-38
Fxyd4	1.20278e-40	0.356894	0.404	0.068	2.58298e-36
Plekho2	1.43099e-40	0.810782	0.667	0.189	3.07304e-36
Gcc1	1.57161e-40	0.61896	0.421	0.076	3.37504e-36
Hspa2	9.17535e-40	0.792076	0.605	0.153	1.97041e-35
Lmna	1.11367e-39	1.47088	0.93	0.613	2.39161e-35
Nfkbiz	1.20538e-39	1.20663	0.868	0.376	2.58854e-35
Kdm6b	1.21033e-39	0.918019	0.965	0.683	2.59918e-35
Sphk1	1.54263e-39	0.572449	0.36	0.056	3.31279e-35
Cxcl1	2.33939e-39	1.4791	0.605	0.178	5.02384e-35
Wsb1	4.17783e-39	1.24414	0.833	0.379	8.97189e-35
Midn	1.8325e-38	0.599687	0.947	0.557	3.93529e-34
Synpo	2.66479e-38	0.600944	0.588	0.144	5.72265e-34
Dennd4a	1.66114e-37	0.359016	0.43	0.083	3.56729e-33
2210403K04Rik	2.47037e-37	0.495632	0.518	0.118	5.30511e-33
Myd88	2.6746e-37	0.817111	0.649	0.186	5.74371e-33
Ifrd1	2.77988e-37	1.20503	0.851	0.379	5.96979e-33
Arid5a	6.09107e-37	0.935571	0.667	0.207	1.30806e-32
Junb	3.28962e-36	1.07199	0.991	0.76	7.06446e-32
Nfkbia	3.71493e-36	1.13389	1	0.91	7.97781e-32
Cebpb	2.62816e-35	0.908669	0.816	0.34	5.64397e-31
Irf1	2.83904e-35	1.24943	0.912	0.53	6.09683e-31
Emp1	3.17293e-35	1.31521	0.807	0.372	6.81386e-31
Col15a1	4.74062e-35	0.43148	0.447	0.096	1.01805e-30
Prr7	7.57009e-35	0.426276	0.325	0.052	1.62568e-30
Ccnl1	2.21063e-34	0.811484	0.912	0.487	4.74733e-30
Adamts9	2.54982e-34	0.431777	0.588	0.16	5.47573e-30
Icam1	2.98631e-34	1.74754	0.798	0.377	6.4131e-30
Bcor	1.16307e-33	0.360029	0.43	0.091	2.49769e-29
Tgtp1	7.22705e-33	0.986363	0.746	0.282	1.55201e-28
Atf4	9.69766e-33	0.921638	0.947	0.548	2.08257e-28
Col13a1	9.73306e-33	0.958958	0.342	0.063	2.09017e-28
Nr4a2	1.13569e-32	1.01563	0.596	0.19	2.43889e-28
Plk3	1.17445e-32	0.96549	0.553	0.161	2.52214e-28
Rrad	2.19518e-32	0.758373	0.36	0.068	4.71415e-28
Zswim4	2.88396e-32	0.473961	0.535	0.144	6.1933e-28
Fam38a	3.44421e-32	0.566567	0.746	0.269	7.39644e-28
Ier5	3.53204e-32	0.990466	0.886	0.472	7.58505e-28
Cxcl2	3.63932e-32	0.387275	0.254	0.035	7.81543e-28
Jund	1.0242e-31	0.830558	0.974	0.817	2.19947e-27
Iigp1	2.11368e-31	1.62215	0.772	0.384	4.53914e-27
Litaf	2.42398e-31	1.13322	0.886	0.515	5.20549e-27
Sqstm1	2.67471e-31	1.35454	1	0.789	5.74393e-27
Mcl1	3.24156e-31	0.919998	0.965	0.671	6.96124e-27
Eif1a	3.38264e-31	0.81814	0.772	0.312	7.26421e-27
Pvr	6.81465e-31	0.821056	0.675	0.245	1.46345e-26
Eif4a1	7.81211e-31	0.999283	0.93	0.691	1.67765e-26
Cish	8.48069e-31	0.931969	0.632	0.207	1.82123e-26
Cdkn1a	1.53804e-30	0.866839	0.982	0.822	3.30295e-26
Ddx5	1.80394e-30	0.785974	1	0.849	3.87396e-26
Eif1	5.71811e-30	0.669088	0.991	0.976	1.22796e-25
Ppp1r18	6.04521e-30	0.278198	0.711	0.26	1.29821e-25
Ints6	6.81678e-30	0.359946	0.518	0.14	1.4639e-25
9330133O14Rik	7.9813e-30	0.389318	0.316	0.055	1.71399e-25
Tiparp	1.03581e-29	0.85694	0.553	0.172	2.22439e-25
Slc25a25	1.19203e-29	0.684171	0.526	0.148	2.55989e-25
Birc3	1.50945e-29	0.613525	0.5	0.136	3.24154e-25
Fbxo30	2.34825e-29	0.546871	0.465	0.119	5.04286e-25
Atf3	6.76979e-29	0.774181	0.912	0.467	1.45381e-24
Pcna	2.70641e-28	0.662358	0.86	0.395	5.81201e-24
Sertad1	6.82742e-28	0.683598	0.921	0.426	1.46619e-23
Ppp1r15a	7.13331e-28	0.859936	0.877	0.473	1.53188e-23
Gja1	7.42792e-28	1.13132	0.851	0.495	1.59514e-23
Pcf11	8.97678e-28	0.631074	0.719	0.296	1.92776e-23
Nasp	9.74434e-28	0.422812	0.57	0.177	2.0926e-23
Taf4b	1.05525e-27	0.414237	0.298	0.054	2.26614e-23
Apold1	1.17462e-27	0.891005	0.965	0.641	2.5225e-23
Hspa8	1.73126e-27	0.781368	0.991	0.966	3.71787e-23
Ripk1	3.62919e-27	0.628551	0.667	0.243	7.79368e-23
Ppp1r10	4.17173e-27	0.662602	0.728	0.302	8.95879e-23
Bag3	5.49917e-27	0.803703	0.833	0.451	1.18095e-22
Nuak2	6.89945e-27	0.730287	0.342	0.073	1.48166e-22
Tubb6	7.69736e-27	0.95027	0.561	0.192	1.65301e-22
Rlim	1.36476e-26	1.04781	0.798	0.406	2.93082e-22
Erf	2.26355e-26	0.337232	0.605	0.218	4.86096e-22
Ces2e	2.78393e-26	0.96291	0.351	0.076	5.97849e-22
Hspa5	2.98618e-26	0.802726	0.965	0.854	6.41282e-22
Gprc5a	3.89944e-26	0.553908	0.351	0.076	8.37405e-22
Lrrc32	5.88666e-26	0.962248	0.667	0.268	1.26416e-21
Spag9	6.90071e-26	0.543325	0.921	0.557	1.48193e-21
Cdkn2d	9.51345e-26	0.549123	0.518	0.154	2.04301e-21
Hbegf	1.339e-25	1.12965	0.684	0.283	2.87551e-21
Zfp36	1.88176e-25	0.888588	0.956	0.778	4.04108e-21
Tsc22d2	3.10011e-25	0.447916	0.675	0.257	6.65749e-21
Pim3	5.81563e-25	0.963739	0.895	0.555	1.24891e-20
Irgm1	6.12591e-25	1.14043	0.737	0.35	1.31554e-20
Ubc	6.79454e-25	0.640731	1	0.952	1.45913e-20
Sox7	9.29953e-25	0.905635	0.886	0.526	1.99707e-20
Nop58	1.66893e-24	0.467835	0.684	0.285	3.58402e-20
Jak2	1.95572e-24	0.354905	0.535	0.173	4.19991e-20
Pnrc1	3.34089e-24	0.823161	0.921	0.622	7.17456e-20
Clic4	5.64937e-24	1.02856	0.982	0.86	1.2132e-19
Rnf122	6.09382e-24	0.525861	0.491	0.152	1.30865e-19
Klf10	8.13445e-24	0.917485	0.737	0.363	1.74687e-19
Baz1a	1.82474e-23	0.35003	0.491	0.152	3.91863e-19
Stx11	1.87535e-23	0.381152	0.254	0.046	4.02732e-19
Ddx3x	1.89007e-23	0.829696	0.93	0.651	4.05892e-19
Spred1	2.14898e-23	0.265139	0.351	0.082	4.61494e-19
Mafk	2.21885e-23	0.857449	0.711	0.314	4.76498e-19
Spry4	2.48844e-23	0.695187	0.658	0.264	5.34392e-19
Tob2	4.52295e-23	0.564264	0.711	0.323	9.71304e-19
Zfand5	7.05859e-23	0.685115	0.895	0.54	1.51583e-18
Klf9	1.16207e-22	0.596635	0.947	0.682	2.49555e-18
Kdm1a	1.25211e-22	0.346921	0.684	0.279	2.6889e-18
Tpm3	1.58501e-22	0.682869	0.974	0.85	3.4038e-18
Crk	1.8623e-22	0.754196	0.807	0.436	3.99928e-18
Pde4b	1.88114e-22	0.936749	0.842	0.471	4.03974e-18
S100a6	2.11324e-22	0.653344	0.789	0.413	4.53819e-18
Parp14	3.65776e-22	0.605909	0.649	0.268	7.85505e-18
Uap1	3.67248e-22	0.997875	0.667	0.314	7.88665e-18
Isg15	5.59698e-22	0.538022	0.693	0.317	1.20195e-17
Map3k8	5.69367e-22	0.657988	0.456	0.149	1.22272e-17
Map2k3	1.0015e-21	0.734334	0.711	0.325	2.15072e-17
Bcr	1.12743e-21	0.918997	0.456	0.149	2.42116e-17
Plaur	1.13589e-21	0.879215	0.675	0.3	2.43933e-17
Mdm2	1.4166e-21	0.455824	0.579	0.222	3.04215e-17
Rgs16	1.45507e-21	1.25031	0.298	0.067	3.12475e-17
Pycard	2.13068e-21	0.329045	0.518	0.178	4.57563e-17
Cd24a	2.25361e-21	1.57492	0.588	0.252	4.83963e-17
Timp3	2.25849e-21	0.901725	0.982	0.841	4.85011e-17
Ptpn12	2.36502e-21	0.335716	0.649	0.268	5.07888e-17
Tob1	2.50161e-21	0.505249	0.789	0.385	5.37222e-17
Ttpal	3.1172e-21	0.367209	0.509	0.171	6.6942e-17
Hsp90aa1	3.20016e-21	0.673237	0.93	0.717	6.87234e-17
Osmr	3.81165e-21	0.716143	0.781	0.426	8.18552e-17
Elf1	3.96832e-21	0.677037	0.842	0.484	8.52197e-17
Itpkc	4.18866e-21	0.37501	0.298	0.068	8.99515e-17
Rap1b	5.46178e-21	0.73694	0.921	0.73	1.17292e-16
Katna1	6.13178e-21	0.415061	0.43	0.126	1.3168e-16
Slc38a2	7.12139e-21	0.681146	0.833	0.497	1.52932e-16
Dusp2	8.48392e-21	0.97776	0.36	0.098	1.82192e-16
Gm12216	1.09954e-20	1.14624	0.491	0.174	2.36126e-16
Gls	1.10768e-20	0.461445	0.763	0.367	2.37875e-16
Gbp5	1.36136e-20	0.334433	0.386	0.107	2.92352e-16
Pdlim1	1.48116e-20	0.779957	0.816	0.453	3.18079e-16
Adamts1	1.68523e-20	1.1561	0.833	0.572	3.61903e-16
Stat3	1.87904e-20	0.526617	0.895	0.501	4.03523e-16
Tmem173	2.03355e-20	0.649377	0.561	0.217	4.36704e-16
1810013L24Rik	2.37532e-20	0.454518	0.632	0.257	5.101e-16
Coq10b	3.86129e-20	0.467095	0.605	0.239	8.29212e-16
Nfil3	5.12768e-20	0.582762	0.404	0.121	1.10117e-15
Sowahc	8.62815e-20	0.482097	0.289	0.068	1.8529e-15
Nfe2l2	9.03559e-20	0.663788	0.895	0.554	1.94039e-15
Trib1	1.54479e-19	0.473495	0.509	0.192	3.31743e-15
Arl13b	2.11902e-19	0.509964	0.474	0.169	4.5506e-15
Esm1	2.18751e-19	1.1208	0.289	0.068	4.69768e-15
Fam53c	2.72283e-19	0.278492	0.333	0.089	5.84727e-15
Tnfrsf12a	3.23027e-19	0.738851	0.544	0.221	6.93701e-15
Arc	3.6046e-19	0.71633	0.272	0.062	7.74087e-15
Tnfaip2	3.91526e-19	0.337651	0.386	0.113	8.40802e-15
Arih1	3.95576e-19	0.292619	0.579	0.23	8.495e-15
Pabpc1	9.33401e-19	0.357089	0.877	0.57	2.00448e-14
Sik1	9.53045e-19	0.534526	0.868	0.601	2.04666e-14
Slbp	1.55731e-18	0.427153	0.632	0.258	3.34433e-14
Tnfaip8l1	1.72426e-18	0.603859	0.474	0.162	3.70285e-14
Ube2s	1.75665e-18	0.279196	0.763	0.391	3.7724e-14
Casp4	1.94556e-18	0.314952	0.404	0.123	4.1781e-14
Jam3	1.9779e-18	0.595166	0.526	0.197	4.24754e-14
Fam38b	2.5214e-18	0.469319	0.342	0.096	5.4147e-14
Tgoln1	4.96548e-18	0.505692	0.842	0.473	1.06634e-13
Egr1	4.98656e-18	0.83237	0.93	0.656	1.07086e-13
Zfp46	5.78019e-18	0.348482	0.368	0.108	1.2413e-13
Rabgef1	6.37348e-18	0.41237	0.509	0.192	1.36871e-13
Gadd45g	7.03541e-18	0.495212	0.693	0.334	1.51085e-13
Rtn4	9.01649e-18	0.303495	0.842	0.449	1.93629e-13
Gna13	1.08424e-17	0.474287	0.561	0.229	2.32841e-13
Elf4	1.57448e-17	0.262488	0.289	0.073	3.3812e-13
Zcchc6	1.93484e-17	0.278755	0.711	0.342	4.15507e-13
Ipo7	2.45491e-17	0.312916	0.368	0.112	5.27192e-13
Ptpre	2.45835e-17	0.424314	0.412	0.135	5.2793e-13
Dusp5	3.01348e-17	0.351086	0.307	0.083	6.47144e-13
Igfbp3	3.96095e-17	1.73808	0.553	0.259	8.50614e-13
Azin1	4.79853e-17	0.435638	0.658	0.317	1.03048e-12
Dnajb1	5.76036e-17	0.620105	0.789	0.455	1.23704e-12
Nr4a1	6.28464e-17	0.58377	0.816	0.502	1.34963e-12
Slc10a6	7.89529e-17	0.511611	0.421	0.141	1.69551e-12
Stc1	1.12909e-16	1.26059	0.36	0.117	2.42472e-12
Ier5l	1.16085e-16	0.521141	0.579	0.255	2.49293e-12
Bcar1	1.16169e-16	0.562584	0.658	0.328	2.49473e-12
Tuba1c	1.29607e-16	0.95205	0.789	0.601	2.78331e-12
Igfbp7	1.30687e-16	0.665875	0.965	0.856	2.8065e-12
Csnk1d	1.38203e-16	0.548792	0.649	0.311	2.96791e-12
Lrrfip1	1.43546e-16	0.444292	0.702	0.331	3.08266e-12
Sema7a	1.7221e-16	0.456839	0.711	0.379	3.6982e-12
Gem	1.88446e-16	0.723501	0.456	0.176	4.04687e-12
Ripk2	1.91629e-16	0.351305	0.325	0.093	4.11523e-12
Slc41a1	2.0535e-16	0.380113	0.36	0.112	4.40988e-12
Itprip	2.1994e-16	0.506118	0.465	0.175	4.72322e-12
Zhx3	2.25099e-16	0.389025	0.526	0.216	4.834e-12
Trip10	2.28818e-16	0.421583	0.605	0.267	4.91387e-12
Gnai3	2.59884e-16	0.518519	0.667	0.334	5.58102e-12
Sf1	2.90091e-16	0.277195	0.772	0.416	6.22969e-12
H3f3b	3.81074e-16	0.492574	1	0.947	8.18356e-12
Zfp948	3.92527e-16	0.340463	0.439	0.159	8.42951e-12
1700029F09Rik	4.07002e-16	0.317267	0.333	0.097	8.74038e-12
Gch1	4.83032e-16	0.562988	0.667	0.329	1.03731e-11
Myh9	6.19402e-16	0.48191	0.965	0.808	1.33017e-11
Eif4g2	6.25387e-16	0.430789	0.947	0.695	1.34302e-11
D730005E14Rik	6.65588e-16	0.264175	0.289	0.076	1.42935e-11
Chd4	6.80392e-16	0.426883	0.693	0.365	1.46114e-11
Bach1	6.89864e-16	0.353255	0.474	0.183	1.48148e-11
Map4k4	7.26293e-16	0.367535	0.728	0.399	1.55971e-11
Sat1	7.44256e-16	0.730662	0.904	0.657	1.59829e-11
Hspb1	9.10824e-16	0.516227	1	0.819	1.95599e-11
Brd2	9.91633e-16	0.57709	0.798	0.501	2.12953e-11
4933424B01Rik	1.06825e-15	0.294495	0.307	0.088	2.29407e-11
Ppp1r2	1.26667e-15	0.595002	0.939	0.745	2.72018e-11
Zbtb11	1.49756e-15	0.291394	0.439	0.16	3.21602e-11
Nfat5	1.57238e-15	0.279043	0.623	0.3	3.37669e-11
Prkch	1.59563e-15	0.388389	0.816	0.47	3.42663e-11
Jmjd1c	1.60195e-15	0.36232	0.667	0.323	3.4402e-11
Tgm2	1.62903e-15	0.664174	0.886	0.688	3.49835e-11
Gm13889	1.68802e-15	0.369628	0.377	0.128	3.62503e-11
Ada	1.71158e-15	0.452184	0.272	0.071	3.67561e-11
Trim25	1.88032e-15	0.504747	0.711	0.365	4.038e-11
Zbtb16	2.25391e-15	0.426351	0.421	0.151	4.84027e-11
Siah2	2.504e-15	0.328342	0.333	0.105	5.37735e-11
Slfn5	2.70731e-15	0.647324	0.93	0.736	5.81395e-11
Tgif1	3.53351e-15	0.46257	0.377	0.133	7.58822e-11
Chd1	3.99278e-15	0.341781	0.64	0.326	8.5745e-11
Ralgds	4.53331e-15	0.380737	0.465	0.184	9.73527e-11
Hif1a	4.53392e-15	0.646975	0.614	0.32	9.7366e-11
Rnf19b	5.07367e-15	0.317248	0.342	0.111	1.08957e-10
Glt25d2	7.60422e-15	0.382684	0.377	0.13	1.63301e-10
Wnk1	8.53799e-15	0.354633	0.886	0.575	1.83353e-10
Neurl3	8.78196e-15	0.433234	0.333	0.105	1.88593e-10
Papss2	1.07953e-14	0.425973	0.553	0.237	2.31829e-10
Erbb2ip	1.37952e-14	0.343006	0.658	0.329	2.96252e-10
Scarb1	1.50151e-14	0.855574	0.816	0.576	3.22449e-10
Grasp	1.66322e-14	0.493751	0.684	0.373	3.57177e-10
Nfkb2	1.7788e-14	0.336547	0.404	0.145	3.81998e-10
Cxcr7	1.77933e-14	1.0953	0.684	0.422	3.82112e-10
Pnp	2.44004e-14	0.442911	0.789	0.458	5.23998e-10
Plxna2	2.44557e-14	0.325494	0.711	0.373	5.25186e-10
Cdc42ep3	2.5005e-14	0.610407	0.816	0.471	5.36983e-10
Gm9766	3.47613e-14	0.407921	0.561	0.26	7.465e-10
Hk1	4.32915e-14	0.277708	0.596	0.285	9.29685e-10
Fscn1	4.4795e-14	0.336729	0.693	0.373	9.61973e-10
Ube2d3	4.80073e-14	0.493728	0.939	0.714	1.03096e-09
Zc3hav1	5.19905e-14	0.348966	0.43	0.163	1.1165e-09
4933407C03Rik	5.39349e-14	0.27779	0.763	0.417	1.15825e-09
Elf2	5.63751e-14	0.362688	0.596	0.286	1.21065e-09
Ranbp2	5.66596e-14	0.266361	0.518	0.224	1.21677e-09
Msn	6.35805e-14	0.486744	0.912	0.755	1.36539e-09
Map3k6	1.08047e-13	0.37432	0.474	0.201	2.3203e-09
Nup62	1.0844e-13	0.576711	0.351	0.125	2.32874e-09
Nrp2	1.49839e-13	0.281682	0.684	0.339	3.2178e-09
Rod1	1.60188e-13	0.308959	0.842	0.541	3.44003e-09
Ankhd1	1.63431e-13	0.281545	0.544	0.245	3.50968e-09
Ivns1abp	1.75797e-13	0.644607	0.649	0.335	3.77524e-09
Eif5	2.57456e-13	0.423327	0.886	0.57	5.52888e-09
Fos	3.23653e-13	0.313627	0.947	0.764	6.95044e-09
Il4ra	3.37535e-13	0.535302	0.579	0.289	7.24856e-09
Sntb2	3.43375e-13	0.321716	0.509	0.218	7.37398e-09
Capn7	3.8736e-13	0.257546	0.395	0.148	8.31856e-09
Rassf1	4.18474e-13	0.37425	0.772	0.443	8.98672e-09
Flt1	4.31254e-13	0.696905	0.947	0.849	9.26119e-09
Grrp1	4.61038e-13	0.561516	0.658	0.358	9.9008e-09
Hnrnpa2b1	5.06253e-13	0.409784	0.974	0.873	1.08718e-08
Ifitm3	6.6241e-13	0.331274	1	0.968	1.42253e-08
Ptprg	7.08792e-13	0.540674	0.684	0.42	1.52213e-08
Lrrc8c	7.1256e-13	0.393975	0.728	0.411	1.53022e-08
Ahctf1	7.25843e-13	0.252393	0.544	0.251	1.55875e-08
Col4a1	7.68404e-13	0.504555	0.965	0.783	1.65015e-08
Pgm1	8.01422e-13	0.413964	0.474	0.2	1.72105e-08
Sfr1	8.14931e-13	0.374146	0.789	0.458	1.75007e-08
Skil	9.17576e-13	0.5594	0.772	0.525	1.9705e-08
Mprip	9.20564e-13	0.338354	0.886	0.582	1.97691e-08
Ywhaz	9.57597e-13	0.358366	1	0.93	2.05644e-08
Hnrnpul1	1.0702e-12	0.27804	0.474	0.205	2.29826e-08
Nufip2	1.08985e-12	0.399994	0.833	0.546	2.34046e-08
Sema3f	1.14502e-12	0.483211	0.57	0.276	2.45892e-08
Pecam1	1.41468e-12	0.372808	1	0.905	3.03803e-08
Gpr56	1.46361e-12	0.403179	0.842	0.552	3.14311e-08
Odc1	1.54113e-12	0.640722	0.456	0.204	3.30957e-08
Impdh2	1.93438e-12	0.390535	0.561	0.274	4.15408e-08
Hnrnph1	2.26219e-12	0.440618	0.789	0.512	4.85806e-08
Fkbp5	2.27596e-12	0.285956	0.368	0.14	4.88762e-08
Myadm	2.29726e-12	0.435668	0.904	0.672	4.93336e-08
Cd274	2.38232e-12	0.333228	0.36	0.133	5.11604e-08
Robo4	2.41803e-12	0.51241	0.825	0.574	5.19273e-08
Itpkb	2.58357e-12	0.300637	0.667	0.335	5.54822e-08
Klf11	2.74762e-12	0.385994	0.421	0.174	5.90051e-08
Hexim1	2.75801e-12	0.405491	0.456	0.201	5.92283e-08
Mat2a	2.75961e-12	0.540091	0.842	0.613	5.92627e-08
Mapre1	2.89012e-12	0.452965	0.825	0.559	6.20654e-08
Lmcd1	2.93728e-12	0.40584	0.64	0.314	6.3078e-08
Tie1	3.25696e-12	0.484916	0.921	0.761	6.99431e-08
Klf16	3.40733e-12	0.28276	0.325	0.118	7.31724e-08
Crtc2	3.51101e-12	0.310969	0.43	0.18	7.53989e-08
Rasip1	3.77845e-12	0.468571	0.921	0.729	8.11422e-08
Topors	4.42914e-12	0.472018	0.456	0.201	9.51158e-08
Zcchc14	4.87519e-12	0.313664	0.535	0.249	1.04695e-07
Mknk2	5.1009e-12	0.29736	0.728	0.425	1.09542e-07
Cyth1	5.33165e-12	0.345625	0.588	0.291	1.14497e-07
Med13	6.0431e-12	0.276451	0.491	0.222	1.29776e-07
Ets1	6.28149e-12	0.429967	0.965	0.782	1.34895e-07
Etf1	7.8713e-12	0.366319	0.553	0.283	1.69036e-07
Pqlc1	8.06526e-12	0.45141	0.518	0.239	1.73201e-07
Wwtr1	8.50856e-12	0.386051	0.798	0.476	1.82721e-07
Sirt1	9.82315e-12	0.337636	0.342	0.131	2.10952e-07
Rell1	1.02953e-11	0.428675	0.588	0.329	2.21091e-07
Crim1	1.0905e-11	0.342681	0.754	0.477	2.34185e-07
Gabpb1	1.13371e-11	0.32377	0.395	0.16	2.43465e-07
Jhdm1d	1.14521e-11	0.397511	0.5	0.238	2.45933e-07
Cebpg	1.25629e-11	0.386704	0.746	0.451	2.69788e-07
Hnrnpu	1.26053e-11	0.352106	0.93	0.656	2.70699e-07
Ahnak	1.37918e-11	0.413729	0.991	0.897	2.96179e-07
Hnrnpf	1.59373e-11	0.381356	0.939	0.747	3.42253e-07
Ubap1	1.70724e-11	0.395651	0.368	0.146	3.6663e-07
Eef1a1	1.80732e-11	0.273073	1	0.996	3.88122e-07
Uaca	1.90709e-11	0.479077	0.675	0.384	4.09548e-07
Nhp2l1	2.61792e-11	0.408419	0.798	0.533	5.62197e-07
B3gnt2	2.66009e-11	0.332197	0.667	0.364	5.71253e-07
Errfi1	2.70599e-11	0.923297	0.482	0.257	5.81111e-07
Eef2	2.89733e-11	0.404879	0.974	0.838	6.22202e-07
Smad1	3.24585e-11	0.430106	0.605	0.333	6.97047e-07
6430527G18Rik	3.64469e-11	0.282153	0.675	0.42	7.82698e-07
Marcksl1	3.65289e-11	0.321712	0.43	0.192	7.84459e-07
Arf4	3.78089e-11	0.528865	0.816	0.636	8.11947e-07
Ankrd33b	4.03438e-11	0.330208	0.395	0.163	8.66383e-07
Bzw1	4.31961e-11	0.393602	0.711	0.427	9.27636e-07
Rbbp6	4.38698e-11	0.265353	0.667	0.376	9.42105e-07
Pfkp	4.79349e-11	0.370359	0.509	0.25	1.0294e-06
Serinc3	5.56425e-11	0.350857	0.991	0.914	1.19492e-06
Bambi	5.94245e-11	0.449383	0.439	0.194	1.27614e-06
Jmjd6	6.30525e-11	0.362038	0.526	0.261	1.35405e-06
Col4a2	6.75226e-11	0.437425	0.939	0.733	1.45005e-06
Abl2	7.11031e-11	0.362435	0.333	0.129	1.52694e-06
Tgtp2	7.35971e-11	0.451257	0.684	0.417	1.5805e-06
Nfkbib	7.58966e-11	0.294434	0.465	0.21	1.62988e-06
Itga5	8.2377e-11	0.282961	0.535	0.265	1.76905e-06
Bcl10	8.54416e-11	0.312964	0.614	0.341	1.83486e-06
Golph3	9.28525e-11	0.407201	0.57	0.305	1.99401e-06
Cdc42ep2	9.69509e-11	0.51411	0.561	0.282	2.08202e-06
Daxx	1.14724e-10	0.324941	0.351	0.139	2.46369e-06
Sertad2	1.21589e-10	0.259854	0.667	0.373	2.61111e-06
Cited2	1.21707e-10	0.417895	0.439	0.203	2.61366e-06
Pdlim5	1.3697e-10	0.349822	0.667	0.394	2.94143e-06
Kcmf1	1.39705e-10	0.368606	0.535	0.277	3.00016e-06
Kpna2	1.40979e-10	0.287037	0.333	0.129	3.02751e-06
Myo1c	1.44549e-10	0.263687	0.772	0.493	3.10418e-06
S100a10	1.48962e-10	0.495497	0.868	0.689	3.19897e-06
Rcan1	1.51812e-10	0.831288	0.456	0.233	3.26017e-06
Smarca5	1.57776e-10	0.333206	0.658	0.382	3.38823e-06
Entpd1	2.16606e-10	0.414697	0.658	0.387	4.6516e-06
Rapgef1	2.26868e-10	0.297122	0.737	0.445	4.87199e-06
Gimap5	2.42899e-10	0.312862	0.658	0.363	5.21627e-06
Csde1	2.54437e-10	0.330598	0.851	0.627	5.46404e-06
Ifit1	2.62545e-10	0.724145	0.439	0.208	5.63815e-06
Zfp36l1	2.63319e-10	0.370915	0.965	0.858	5.65477e-06
Plcb1	2.6503e-10	0.380898	0.5	0.254	5.69153e-06
Glud1	2.72753e-10	0.40719	0.719	0.466	5.85737e-06
Sf3b1	2.90601e-10	0.364471	0.825	0.571	6.24065e-06
Spty2d1	2.95317e-10	0.260443	0.43	0.197	6.34193e-06
Tmod3	3.13446e-10	0.354754	0.886	0.63	6.73126e-06
Rhbdf2	3.25815e-10	0.31266	0.36	0.147	6.99687e-06
Fam70b	3.56903e-10	0.275503	0.447	0.196	7.66448e-06
Slc5a3	4.06955e-10	0.347405	0.368	0.159	8.73935e-06
Srsf10	4.3343e-10	0.28072	0.693	0.409	9.30792e-06
BC006779	4.49831e-10	0.296252	0.421	0.189	9.66013e-06
Dnajb9	5.04464e-10	0.39091	0.623	0.353	1.08334e-05
Slc20a1	5.21693e-10	0.336476	0.281	0.104	1.12033e-05
Ddx3y	5.49523e-10	0.271782	0.474	0.229	1.1801e-05
Rnf125	5.92977e-10	0.266204	0.693	0.392	1.27342e-05
Syne2	7.01928e-10	0.334018	0.64	0.373	1.50739e-05
Actg1	7.22935e-10	0.475447	1	0.966	1.5525e-05
Chka	7.24628e-10	0.39804	0.395	0.177	1.55614e-05
Rapgef4	8.15812e-10	0.366856	0.632	0.393	1.75196e-05
Btg1	8.49541e-10	0.505675	0.868	0.683	1.82439e-05
Pdcd6ip	9.1893e-10	0.38882	0.658	0.419	1.9734e-05
Ednrb	1.08557e-09	0.526325	0.632	0.375	2.33126e-05
Capza1	1.17313e-09	0.259532	0.658	0.397	2.51931e-05
Rbm27	1.49628e-09	0.353267	0.439	0.211	3.21327e-05
Tor1aip2	1.49806e-09	0.413511	0.588	0.341	3.21709e-05
Irf8	1.70013e-09	0.419192	0.333	0.145	3.65103e-05
Hnrnpab	1.85521e-09	0.34569	0.921	0.714	3.98405e-05
Ralb	1.95712e-09	0.438802	0.719	0.486	4.2029e-05
Ramp3	2.04324e-09	0.666771	0.368	0.17	4.38786e-05
Plvap	2.23846e-09	0.733678	0.588	0.355	4.80709e-05
F2r	2.27451e-09	0.377449	0.5	0.25	4.88451e-05
Csf1	2.33399e-09	0.412355	0.395	0.184	5.01225e-05
Rbm18	2.59138e-09	0.401014	0.474	0.243	5.56499e-05
Tenc1	2.59742e-09	0.446653	0.693	0.491	5.57796e-05
Aff4	3.01839e-09	0.263118	0.596	0.345	6.48198e-05
Cdc42ep4	3.53262e-09	0.471203	0.553	0.31	7.58629e-05
Dusp8	3.68828e-09	0.257632	0.447	0.219	7.92059e-05
Pnpla2	3.73904e-09	0.298029	0.746	0.465	8.0296e-05
Bcam	3.82845e-09	0.369166	0.895	0.72	8.2216e-05
Mef2a	4.06578e-09	0.350837	0.658	0.413	8.73127e-05
Akap2	4.70558e-09	0.375851	0.921	0.773	0.000101052
Ncl	4.76104e-09	0.293682	0.921	0.747	0.000102243
Tpp2	4.95652e-09	0.338122	0.509	0.282	0.000106441
Nfatc1	5.52777e-09	0.250866	0.5	0.275	0.000118709
Ppap2b	5.66621e-09	0.458855	0.912	0.701	0.000121682
Nrp1	6.21515e-09	0.508798	0.93	0.863	0.00013347
Actn4	6.33509e-09	0.298211	0.965	0.819	0.000136046
Swap70	6.40728e-09	0.255036	0.518	0.275	0.000137596
Emcn	7.04881e-09	0.483541	0.947	0.758	0.000151373
Eml1	7.58918e-09	0.651687	0.482	0.275	0.000162978
Dll4	8.14332e-09	0.534643	0.623	0.377	0.000174878
Mmrn2	8.33526e-09	0.349857	0.886	0.699	0.000179
Eif6	8.44274e-09	0.269005	0.693	0.416	0.000181308
Mylip	9.67904e-09	0.254804	0.649	0.378	0.000207857
Trp53i11	1.09423e-08	0.42101	0.544	0.3	0.000234985
Prr14	1.12466e-08	0.376224	0.509	0.28	0.00024152
Sdcbp	1.15463e-08	0.431022	0.886	0.755	0.000247956
Pmp22	1.23541e-08	0.261883	0.711	0.477	0.000265304
Acox1	1.29119e-08	0.268246	0.518	0.283	0.000277284
Samhd1	1.38709e-08	0.403947	0.544	0.31	0.000297877
1190002H23Rik	1.48236e-08	0.427563	0.868	0.661	0.000318337
Mob3c	1.48332e-08	0.262987	0.281	0.109	0.000318544
Khdrbs1	1.48843e-08	0.282522	0.535	0.31	0.000319641
Riok3	1.6226e-08	0.263063	0.474	0.253	0.000348452
Endod1	1.66076e-08	0.359482	0.386	0.183	0.000356647
Arf6	1.66254e-08	0.311627	0.868	0.647	0.00035703
Rsad2	1.74471e-08	0.312703	0.588	0.34	0.000374677
Csnk1a1	1.8323e-08	0.26442	0.807	0.581	0.000393487
Epha2	1.9594e-08	0.322806	0.289	0.121	0.000420782
Atf1	2.11251e-08	0.274447	0.342	0.155	0.000453661
Nbl1	2.36488e-08	0.329422	0.289	0.12	0.000507858
Rhoc	2.44814e-08	0.261227	0.886	0.627	0.000525739
Rc3h1	2.51605e-08	0.349836	0.526	0.312	0.000540321
Upp1	2.82929e-08	0.425707	0.342	0.153	0.000607591
Myc	2.98326e-08	0.795742	0.272	0.117	0.000640654
Wac	3.07936e-08	0.25639	0.632	0.412	0.000661294
2810403A07Rik	4.11791e-08	0.289569	0.596	0.383	0.000884322
Rictor	4.13835e-08	0.332018	0.395	0.204	0.000888711
Eltd1	4.29684e-08	0.416338	0.921	0.781	0.000922746
Lama4	4.42095e-08	0.311407	0.57	0.334	0.000949399
Cnnm4	4.74461e-08	0.291263	0.342	0.158	0.0010189
Lrrc59	4.88269e-08	0.351138	0.456	0.251	0.00104856
Fam43a	5.0519e-08	0.547905	0.623	0.408	0.0010849
Gpr146	5.25884e-08	0.35385	0.684	0.45	0.00112934
Dgke	5.39181e-08	0.2729	0.368	0.173	0.00115789
Tnfrsf1a	5.87573e-08	0.303498	0.798	0.566	0.00126181
Whsc1l1	5.88942e-08	0.344404	0.693	0.459	0.00126475
Mapkapk2	6.73889e-08	0.285259	0.395	0.2	0.00144718
Ifi47	7.59182e-08	0.508786	0.447	0.242	0.00163034
App	9.3003e-08	0.362479	0.991	0.899	0.00199724
Cnn3	9.50544e-08	0.348781	0.912	0.743	0.00204129
Tmem185b	1.03375e-07	0.294995	0.351	0.164	0.00221999
Mustn1	1.11748e-07	0.364693	0.377	0.185	0.00239979
BC031781	1.19236e-07	0.302739	0.43	0.229	0.0025606
Spry1	1.27069e-07	0.539509	0.535	0.334	0.0027288
Prdm2	1.32353e-07	0.269406	0.474	0.275	0.00284227
Ier2	1.41852e-07	0.332584	0.965	0.79	0.00304628
Ccdc85a	1.65863e-07	0.431321	0.43	0.239	0.00356192
Podxl	1.67186e-07	0.259919	0.886	0.686	0.00359033
Tap1	1.70727e-07	0.331899	0.482	0.274	0.00366635
Zfand2a	2.13878e-07	0.300917	0.316	0.149	0.00459303
Kitl	2.4271e-07	0.34607	0.825	0.632	0.0052122
Tbcc	2.68727e-07	0.285669	0.386	0.19	0.00577092
Sar1a	2.7324e-07	0.306273	0.693	0.49	0.00586783
Rnf19a	3.34536e-07	0.281352	0.456	0.251	0.00718417
Calu	3.46584e-07	0.270527	0.719	0.512	0.0074429
Lnx1	3.48975e-07	0.451518	0.386	0.208	0.00749423
Peli1	3.53801e-07	0.283393	0.535	0.319	0.00759788
Ptbp1	3.6827e-07	0.452185	0.553	0.372	0.00790859
Smtn	4.28805e-07	0.296503	0.623	0.41	0.00920859
Ptgs1	6.91249e-07	0.386645	0.439	0.247	0.0148446
Itih5	7.28872e-07	0.462704	0.368	0.192	0.0156525
Birc2	7.62585e-07	0.351819	0.263	0.117	0.0163765
Nfe2l1	7.74635e-07	0.261649	0.684	0.481	0.0166353
Zbed6	7.79524e-07	0.264794	0.263	0.113	0.0167403
Jak3	9.00606e-07	0.25836	0.386	0.201	0.0193405
Pdlim4	9.70008e-07	0.390684	0.254	0.113	0.0208309
Ltbp4	9.75469e-07	0.2767	0.947	0.743	0.0209482
Cdv3	1.42955e-06	0.316834	0.746	0.57	0.0306996
Csrp1	1.54515e-06	0.309793	0.746	0.558	0.0331821
Rhoj	1.93608e-06	0.276209	0.781	0.589	0.0415774
Rela	1.95472e-06	0.280726	0.64	0.435	0.0419777
Tspan12	2.07543e-06	0.280177	0.693	0.491	0.0445699
Yrdc	2.34198e-06	0.297889	0.404	0.219	0.050294
B4galt3	2.4145e-06	0.300551	0.298	0.143	0.0518514
Ehd4	2.46056e-06	0.272011	0.667	0.458	0.0528406
Mta2	2.49785e-06	0.254121	0.5	0.31	0.0536414
Plk2	3.35587e-06	0.43972	0.754	0.6	0.0720672
Mpp5	3.61035e-06	0.251873	0.281	0.135	0.0775322
Gas6	3.66975e-06	0.286037	0.746	0.571	0.0788079
Ifit2	6.06766e-06	0.350148	0.298	0.148	0.130303
Slc35e4	6.48246e-06	0.260829	0.289	0.142	0.139211
Baiap2	7.23182e-06	0.321847	0.395	0.23	0.155303
Cdh13	7.99632e-06	0.257868	0.614	0.403	0.171721
Clk1	8.63846e-06	0.298128	0.737	0.529	0.185511
Vgll4	9.50417e-06	0.312363	0.5	0.322	0.204102
Insr	1.49779e-05	0.316482	0.412	0.245	0.321651
Fbln2	1.76924e-05	0.491502	0.474	0.319	0.379944
Trim16	2.08805e-05	0.274906	0.342	0.189	0.448408
Tuba4a	2.12543e-05	0.375846	0.316	0.178	0.456437
Mef2c	2.5264e-05	0.270191	0.614	0.455	0.542545
Med13l	2.87192e-05	0.303297	0.421	0.27	0.616745
Hsph1	3.22438e-05	0.310759	0.289	0.156	0.692435
Zfp281	3.88954e-05	0.263466	0.307	0.168	0.835278
Tmem33	4.32927e-05	0.27479	0.491	0.313	0.929712
Tcp11l2	9.29391e-05	0.269945	0.447	0.295	1
Dnajb4	9.56509e-05	0.405113	0.298	0.173	1
Klhl4	9.70422e-05	0.305412	0.263	0.139	1
Myo6	0.000118293	0.251015	0.561	0.416	1
Sap130	0.000147246	0.296579	0.298	0.17	1
Irf7	0.000204824	0.305287	0.386	0.245	1
Dnaja4	0.00026678	0.316229	0.281	0.165	1
Ppme1	0.000511496	0.264827	0.316	0.191	1
Ablim3	0.000533274	0.347698	0.43	0.296	1
Pmm2	0.00067837	0.252315	0.289	0.173	1
Gbp2	0.00108628	0.324888	0.535	0.393	1
Akap12	0.00169314	0.587334	0.702	0.589	1
Nxf1	0.00192596	0.293699	0.351	0.239	1
Slco2b1	0.00198071	0.255655	0.351	0.241	1
Lrg1	0.00202769	0.510548	0.263	0.157	1
Ugdh	0.0037818	0.311921	0.254	0.159	1
Klf6	0.0041532	0.297831	0.807	0.717	1
Itgb5	0.00552467	0.258308	0.325	0.24	1
Nr1d1	0.00686893	0.275132	0.36	0.258	1
Aqp1	0.0146028	0.580841	0.596	0.564	1
Erap1	0.0166792	0.262845	0.307	0.221	1
Efr3b	0.0287309	0.286798	0.368	0.276	1
Mt2	0.0323148	0.654413	0.342	0.289	1
Mt1	0.0584651	0.6995	0.456	0.456	1
Anxa1	0.340103	0.454926	0.307	0.3	1
